# Supplementary material for: Synthesis of 5,10,15,20-meso-unsubstituted and 5,10,15,20-meso-substituted-21,23-ditellura/diselena core-modified porphyrinogens: oxidation and detection of mercury(ii)
Source: Royal Society of Chemistry journal article supplement (doi:10.1039/c3ra46491a), 2013-12-02
Supplement: c3ra46491a.pdf [file c3ra46491a.pdf]

Supplementary Information for publication

**Synthesis of 5,10,15,20-*meso*-unsubstituted and 5,10,15,20-*meso*-substituted-21,23-ditellura/diselena core-modified porphyrinogens: oxidation and detection of mercury(II)**

Sohail Ahmad, Kumar Karitkey Yadav, Sarangthem Joychandra Singh and S. M. S. Chauhan\*  
Bio-organic laboratory, Department of Chemistry, University of Delhi, Delhi-110007, India  
Tel.: 91-11-27666845; fax: 91-11-27666845; e-mail: [smschauhan@chemistry.du.ac.in](mailto:smschauhan@chemistry.du.ac.in)

**Table of Contents:**

|                                                                                                            |          |
|------------------------------------------------------------------------------------------------------------|----------|
| <sup>1</sup> H NMR and <sup>13</sup> C NMR spectra of diynediols.                                          | S2-S6    |
| <sup>1</sup> H NMR and <sup>13</sup> C NMR spectra of tellurophene and selenophene diols ( <b>3a-3h</b> ). | S7-S20   |
| <sup>1</sup> H NMR and <sup>13</sup> C NMR spectra of dipyrroles ( <b>4a-4h</b> ).                         | S21-S31  |
| <sup>1</sup> H NMR and <sup>13</sup> C NMR spectra of porphyrinogens <b>5a-5g, 6a, 7a 8a, 9, 10</b> .      | S32-S56  |
| <sup>1</sup> H NMR spectra of porphine, porphyrin and reduced porphyrins.                                  | S57-S64  |
| Uv-Visible spectra of porphine, porphyrin and reduced porphyrins.                                          | S65- S67 |
| Uv-Visible spectra of <b>7g</b> and <b>8g</b> with Hg <sup>2+</sup> .                                      | S68      |
| Job's Plot of <b>5g</b> with Hg <sup>2+</sup> ions.                                                        | S69      |
| <sup>125</sup> Te NMR spectra of porphyrinogens.                                                           | S70      |
| <sup>77</sup> Se NMR spectra of porphyrinogens.                                                            | S71      |
| <sup>125</sup> Te NMR spectra of <b>5g</b> with Hg <sup>2+</sup> .                                         | S72      |
| Selected HR mass spectra of porphyrinogens.                                                                | S73-S76  |
| Crystal data of <b>5g</b> .                                                                                | S77      |

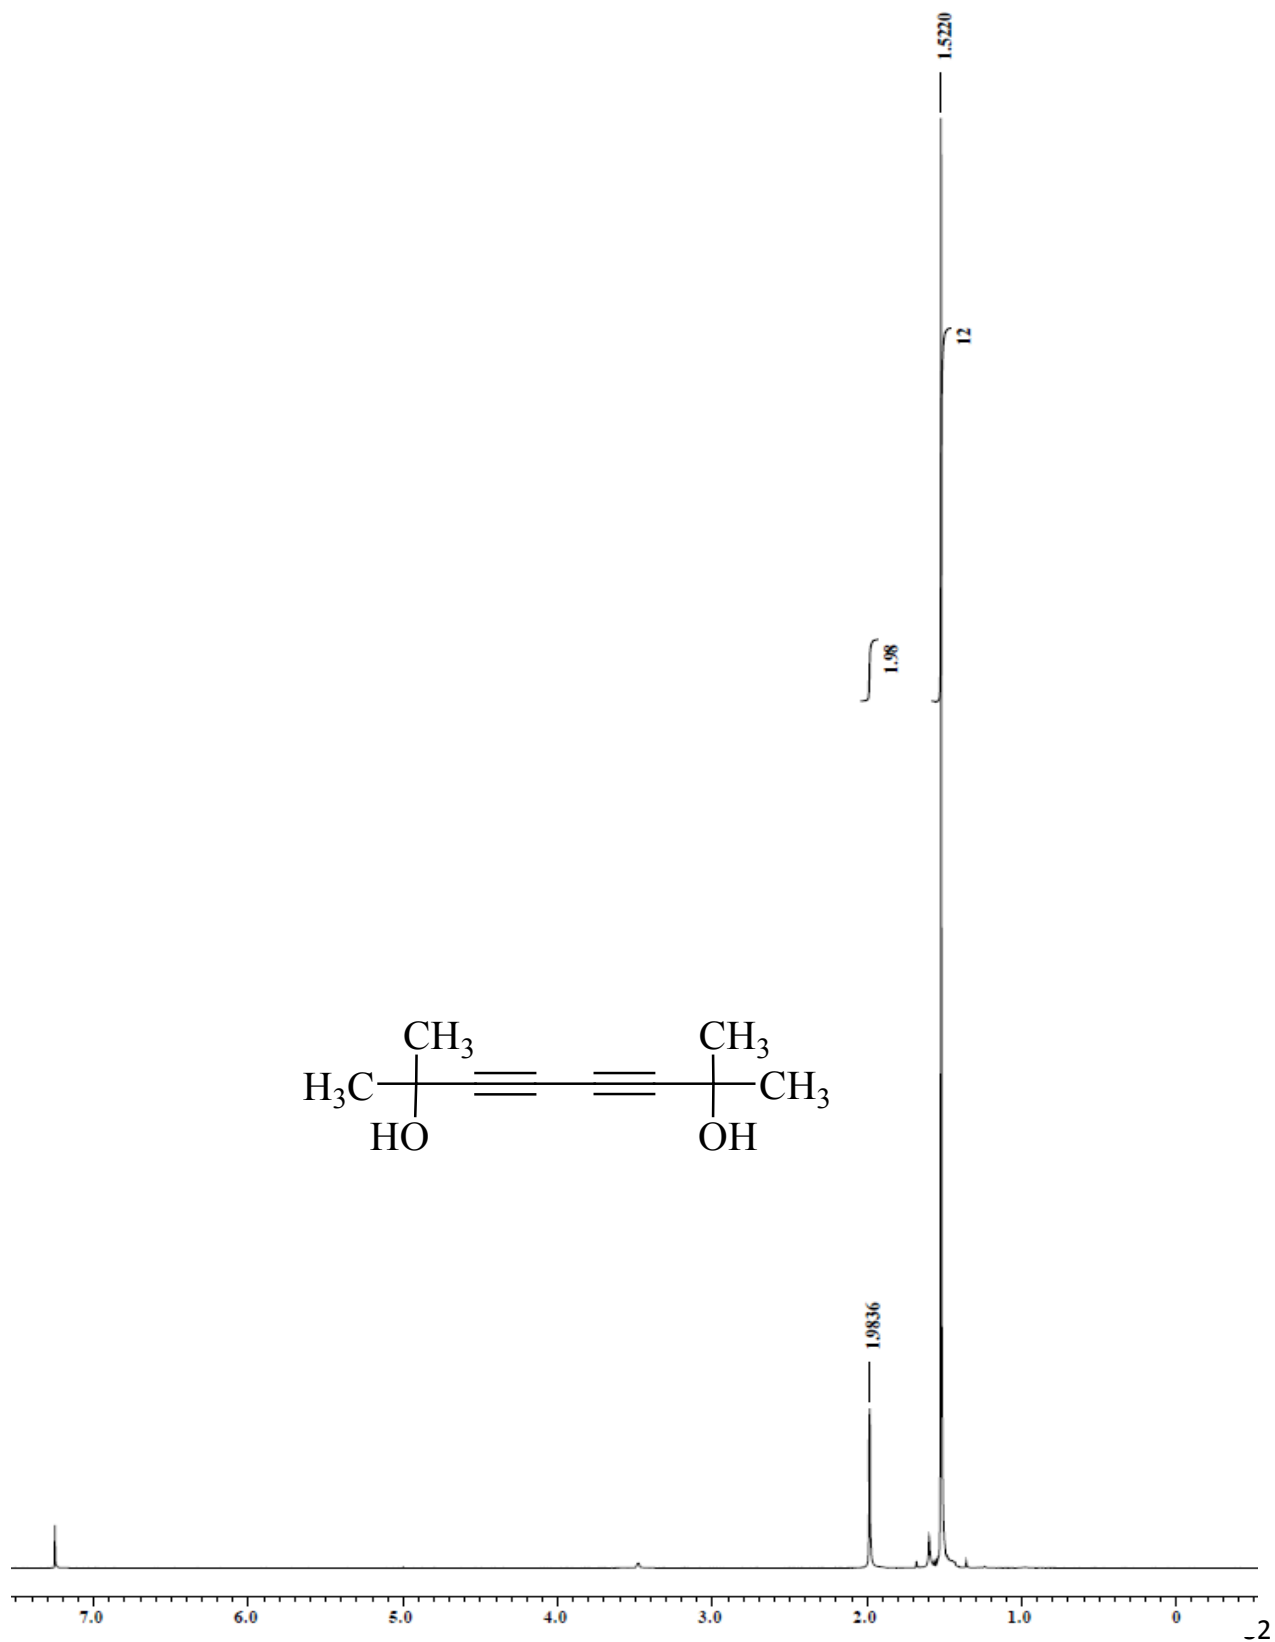

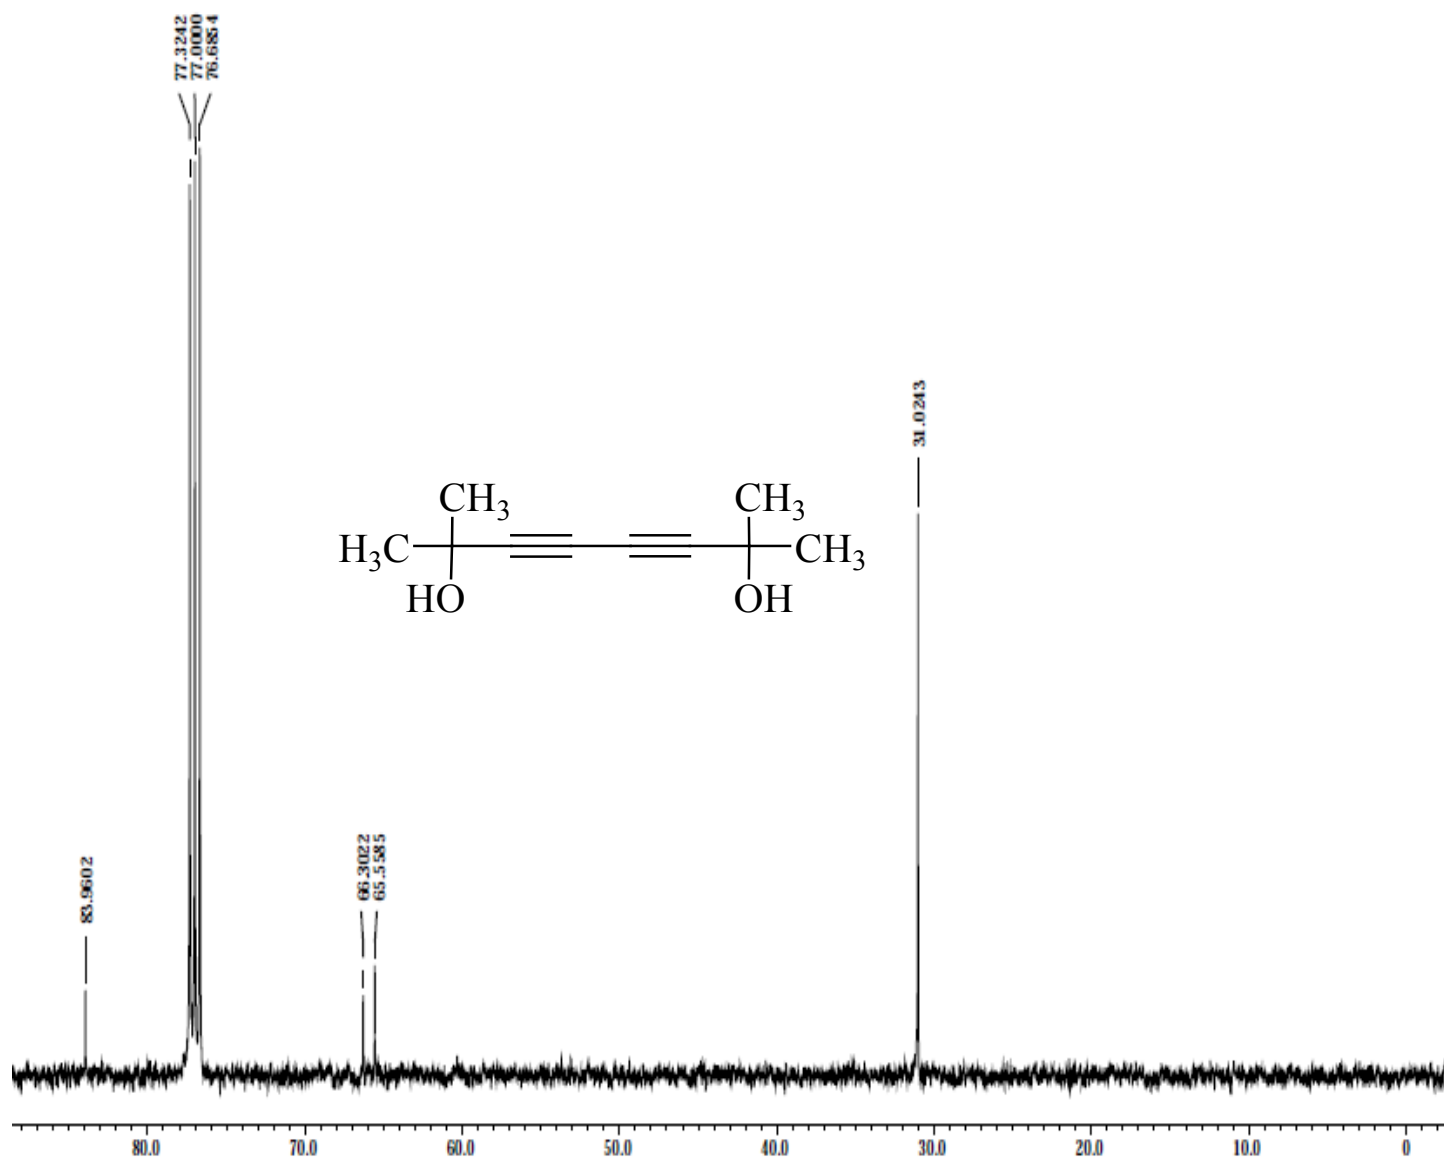

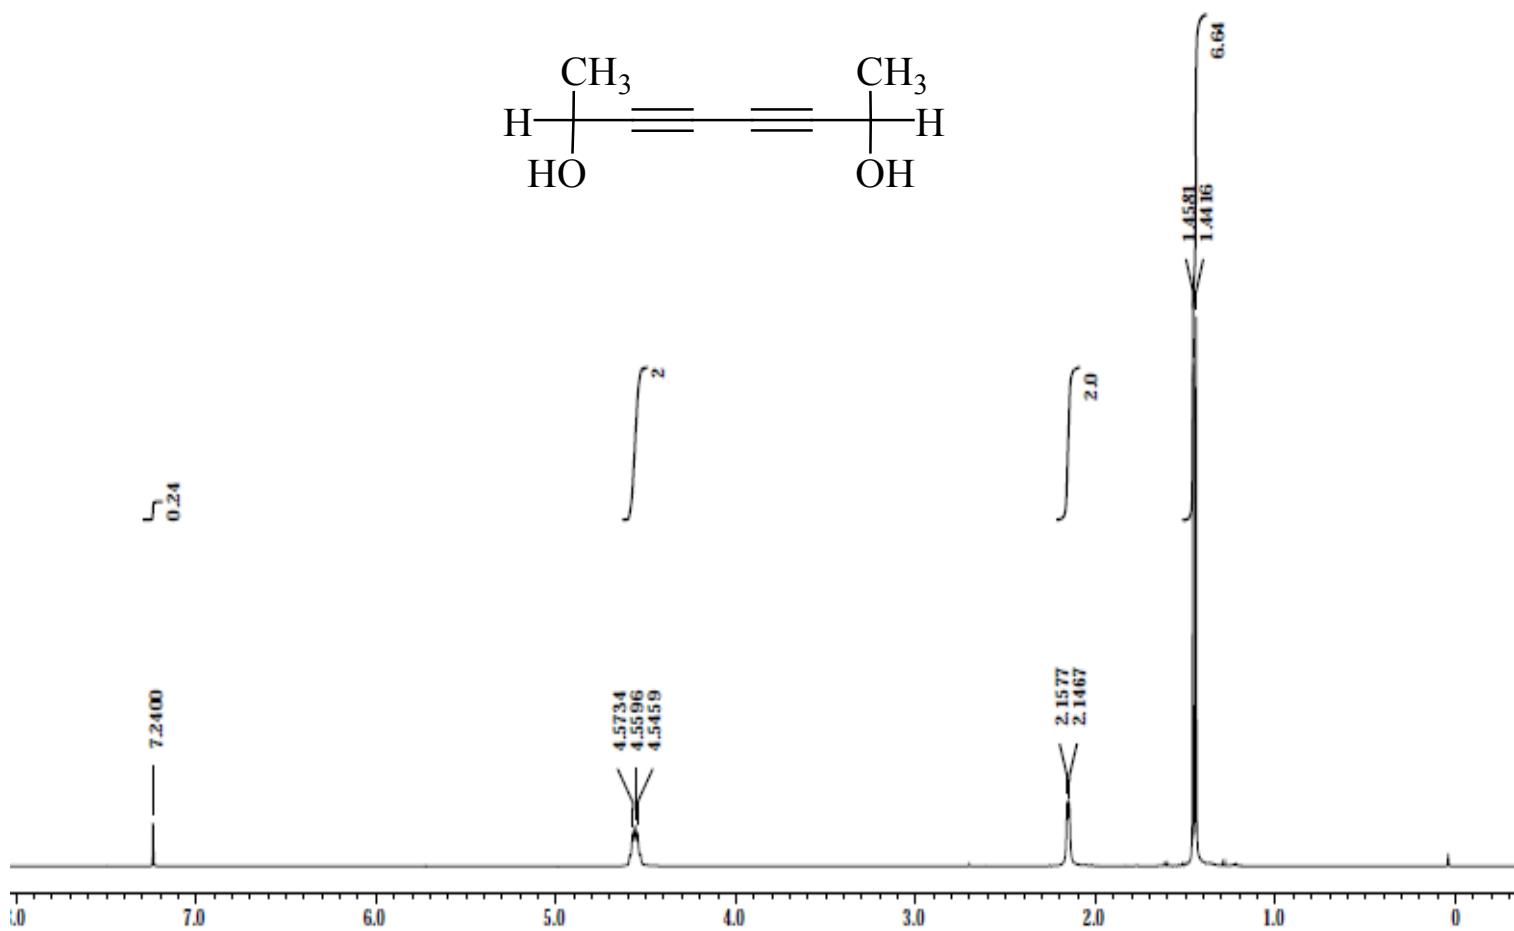

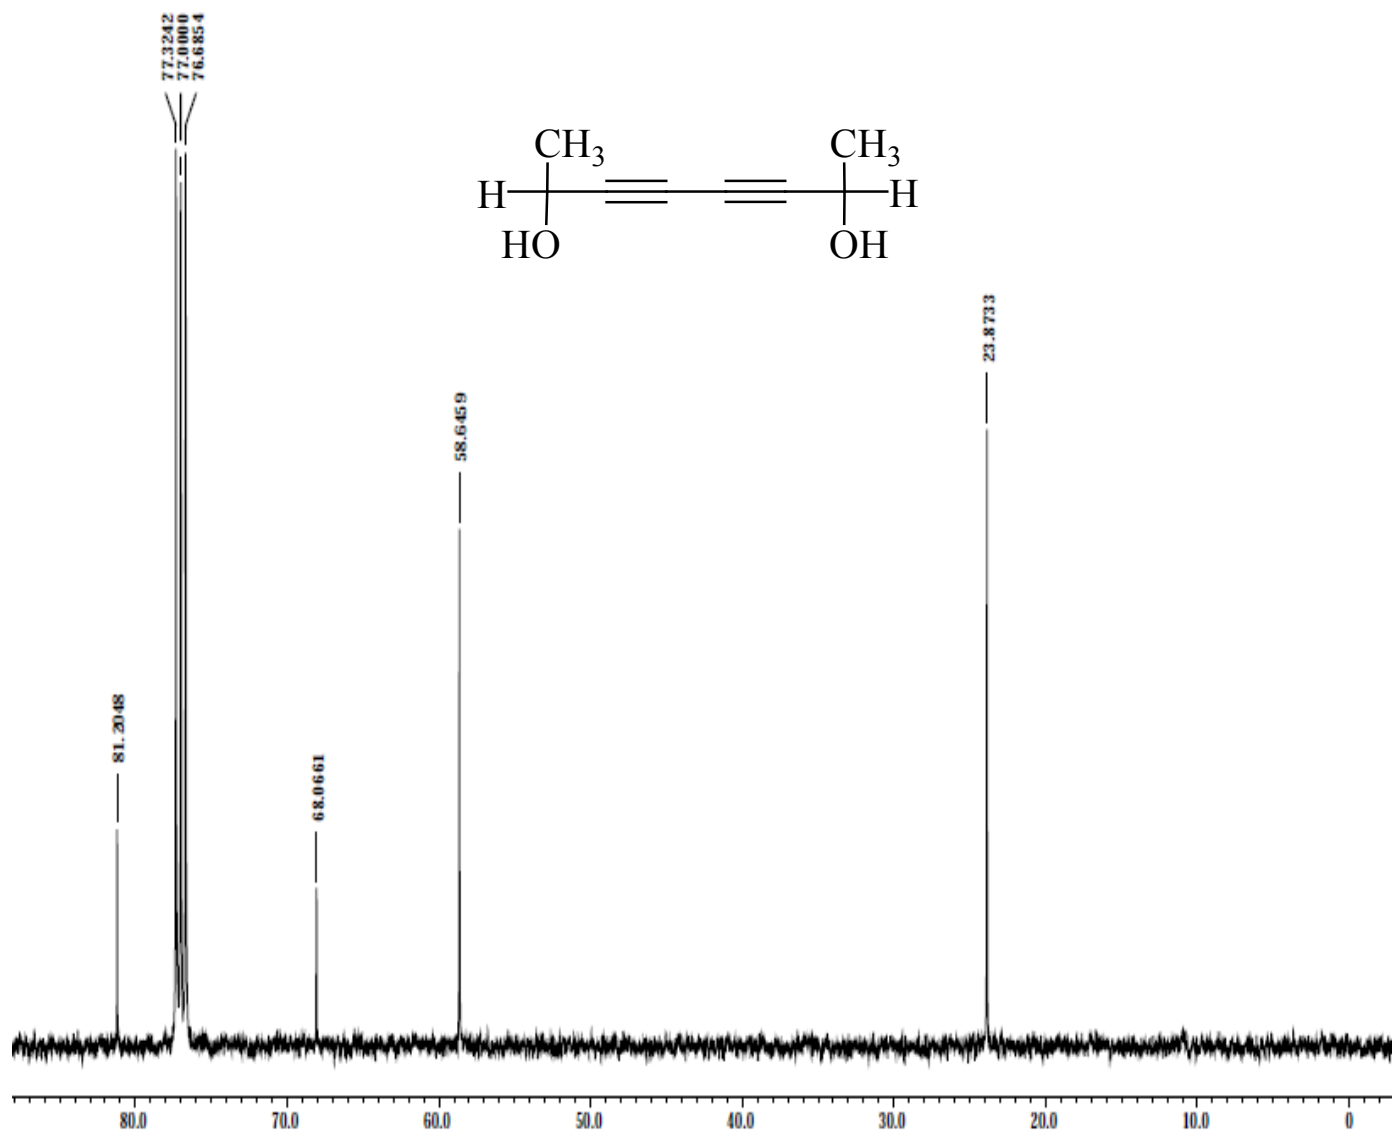

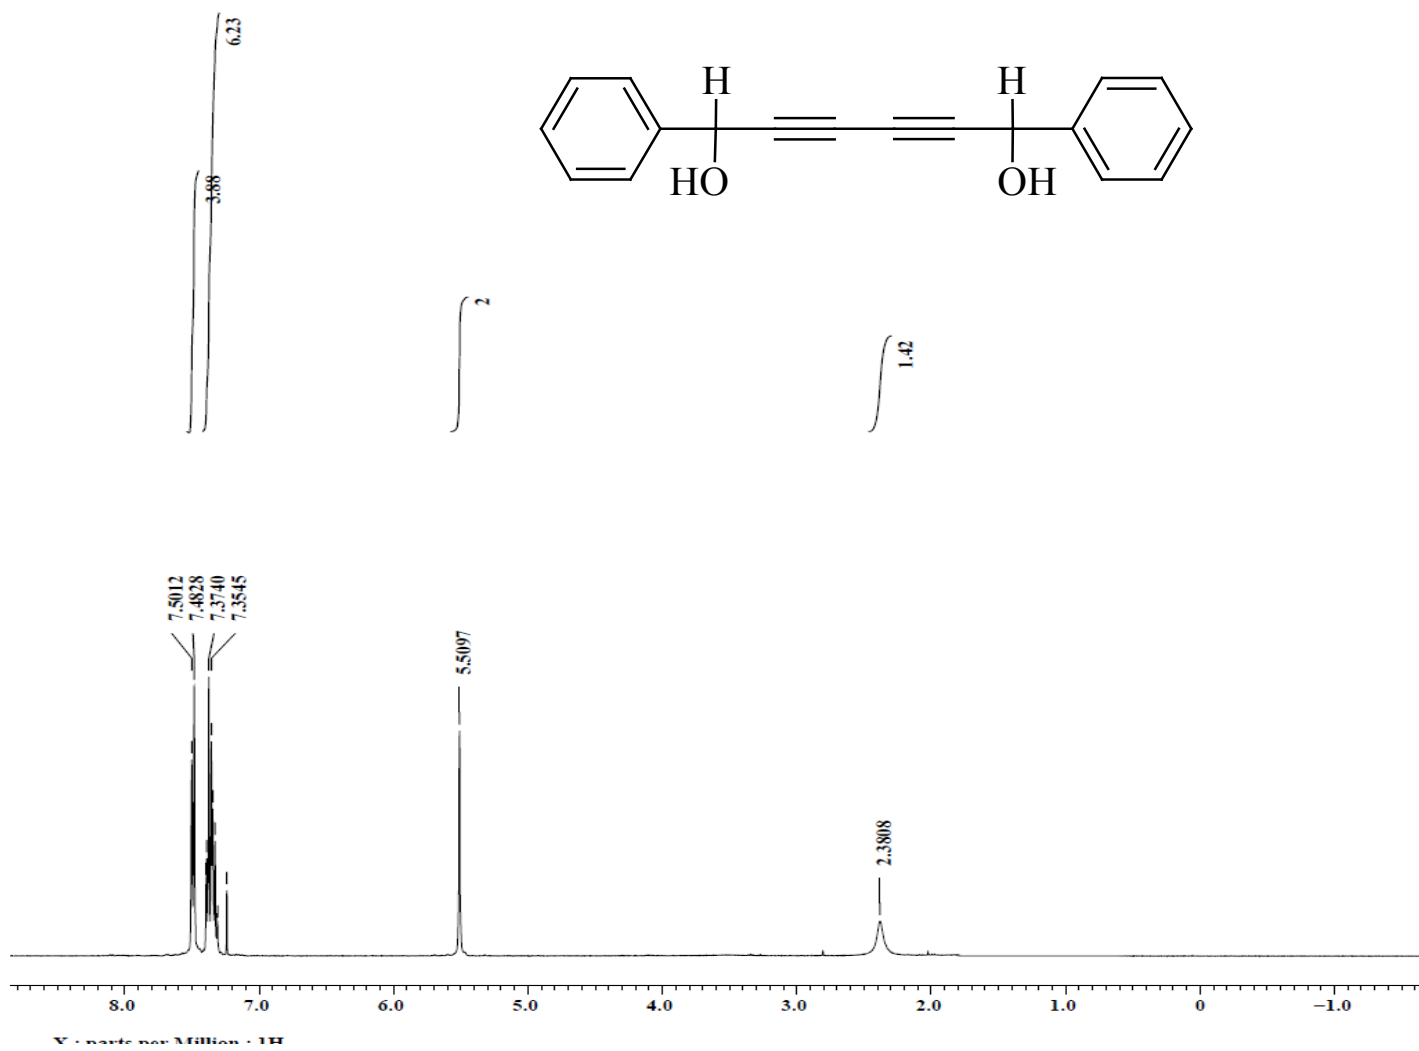

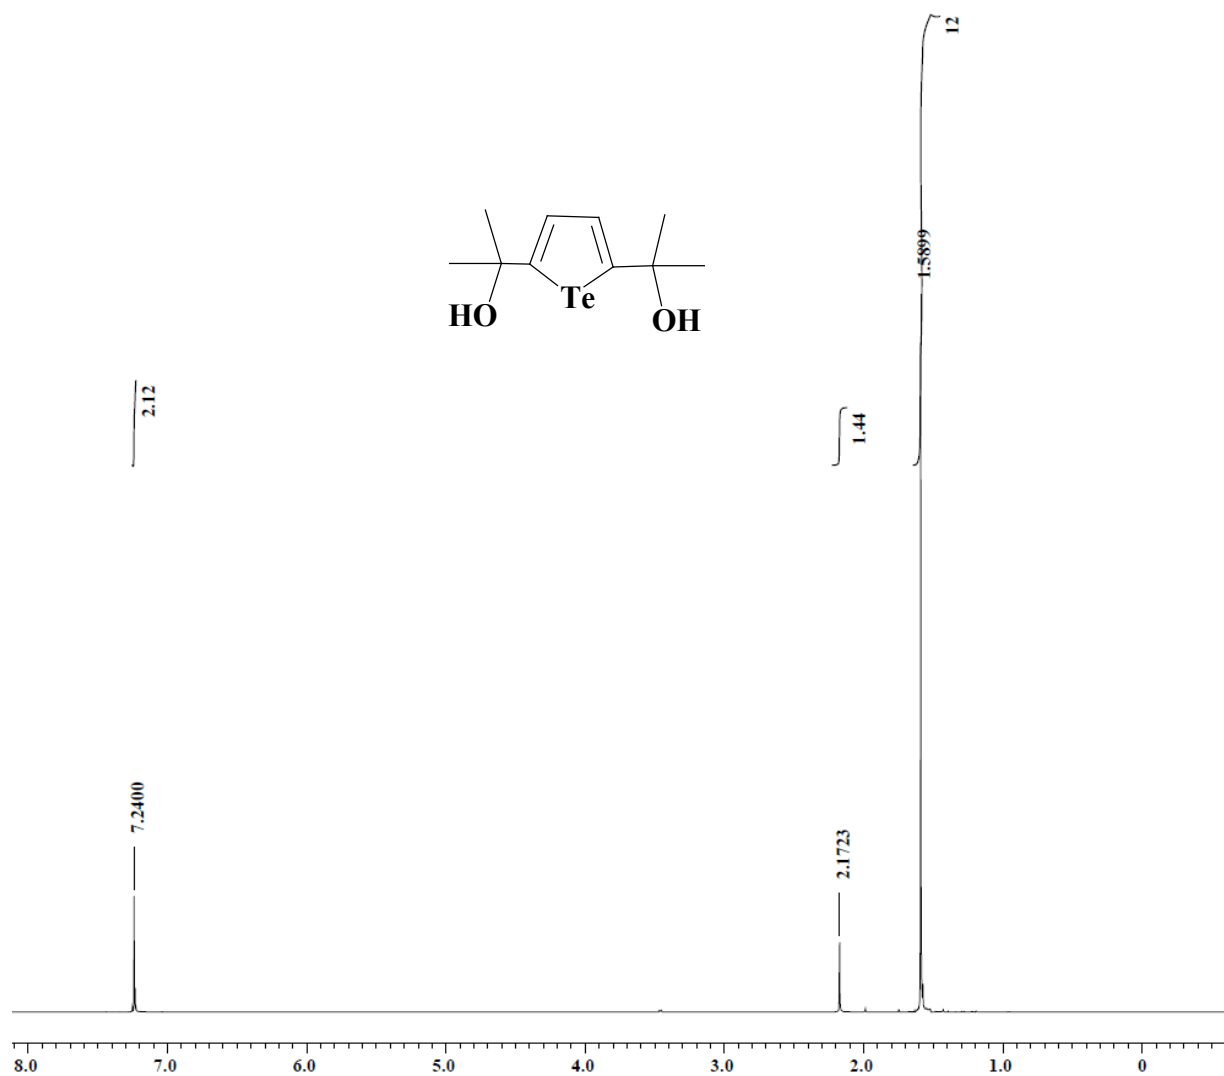

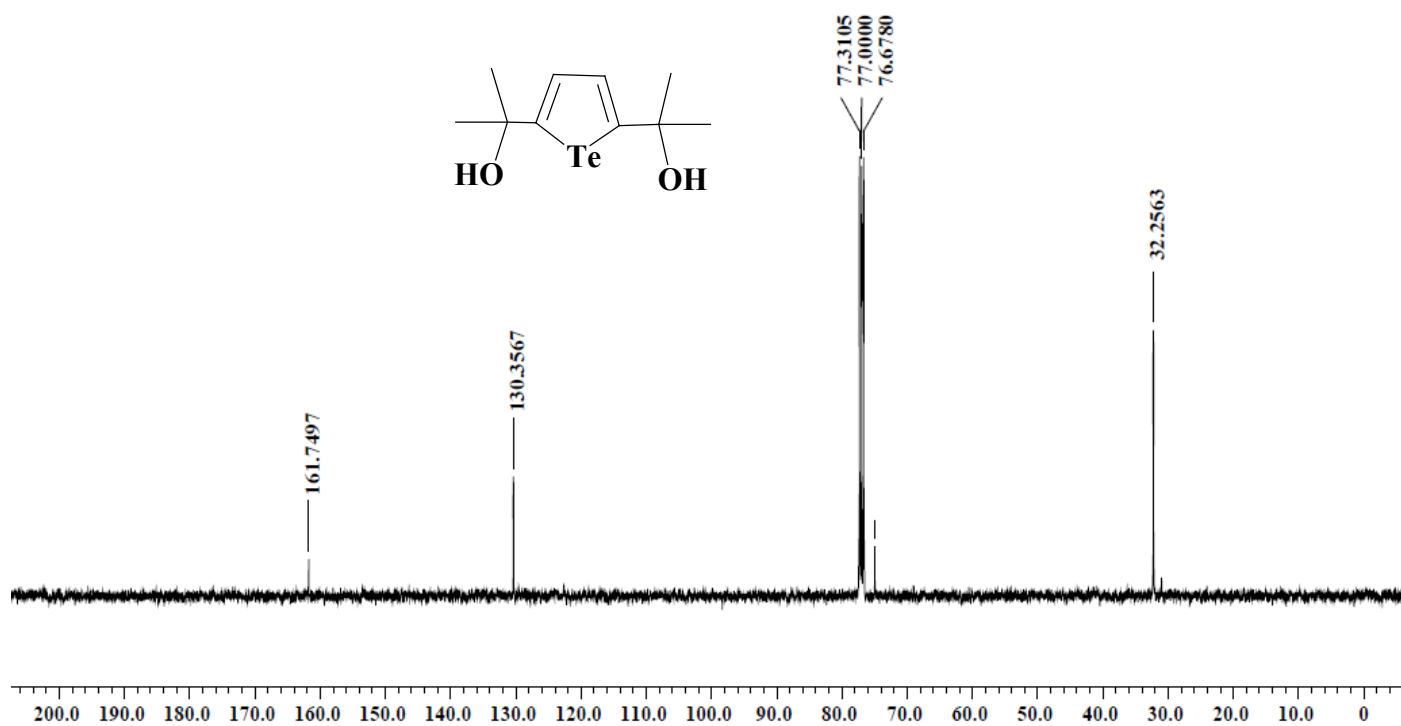



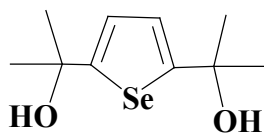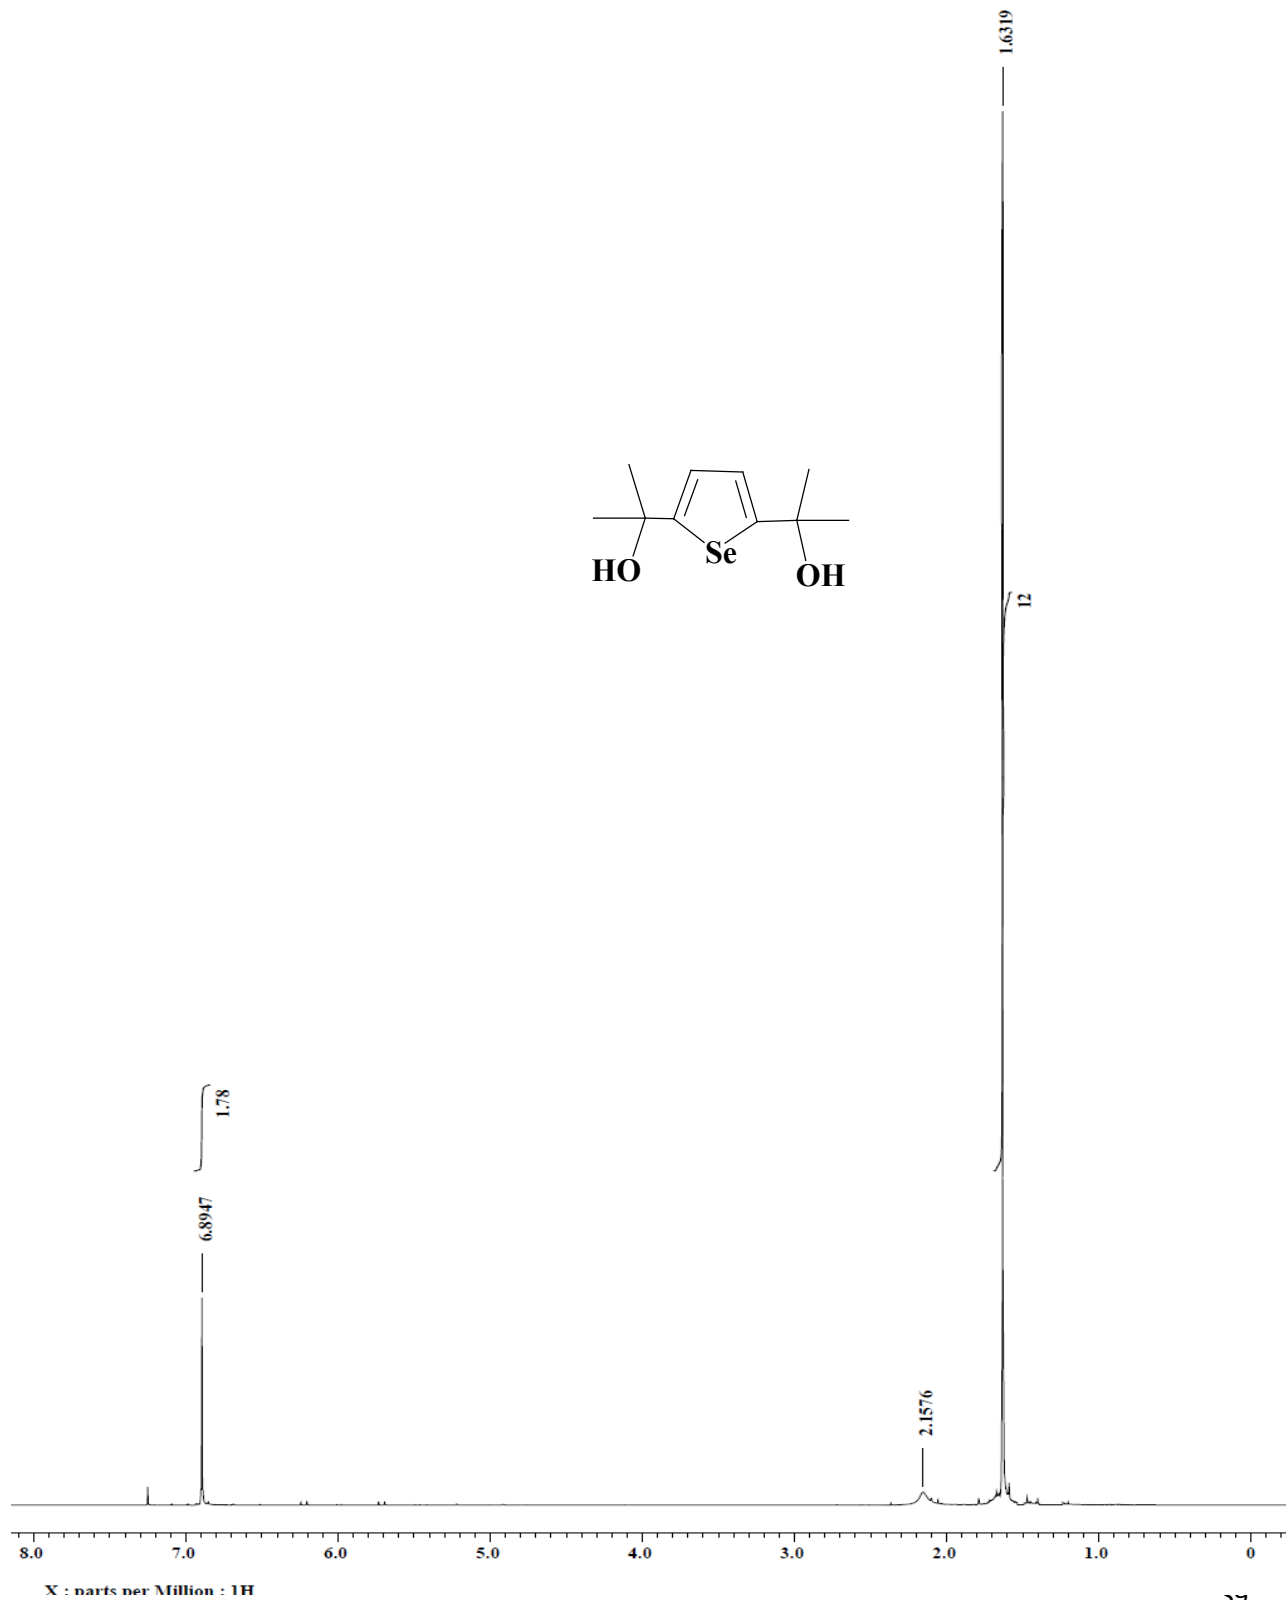

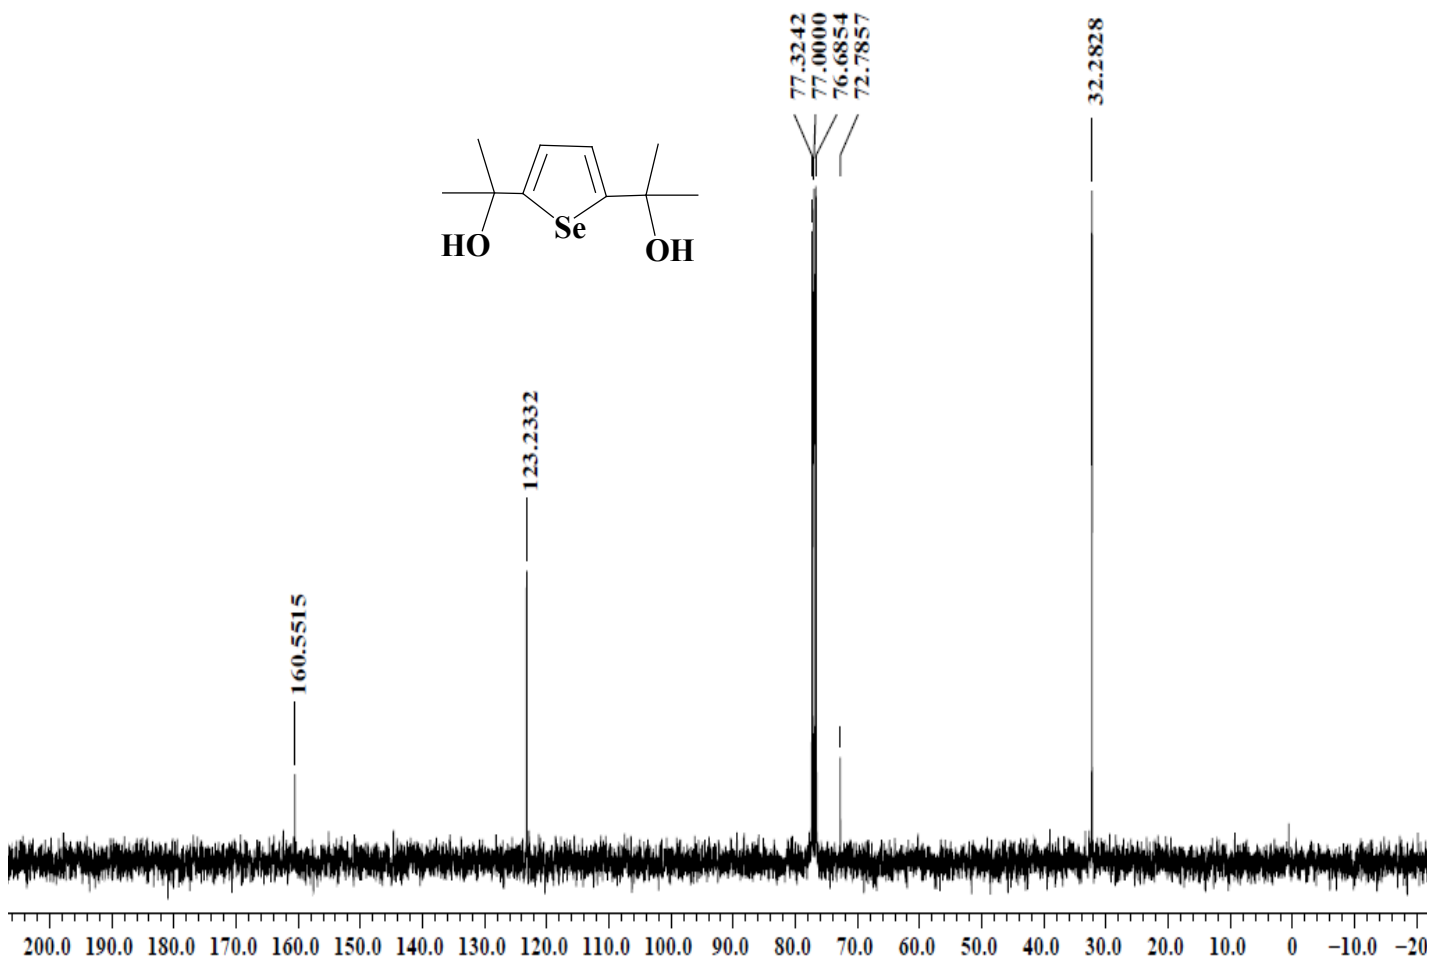

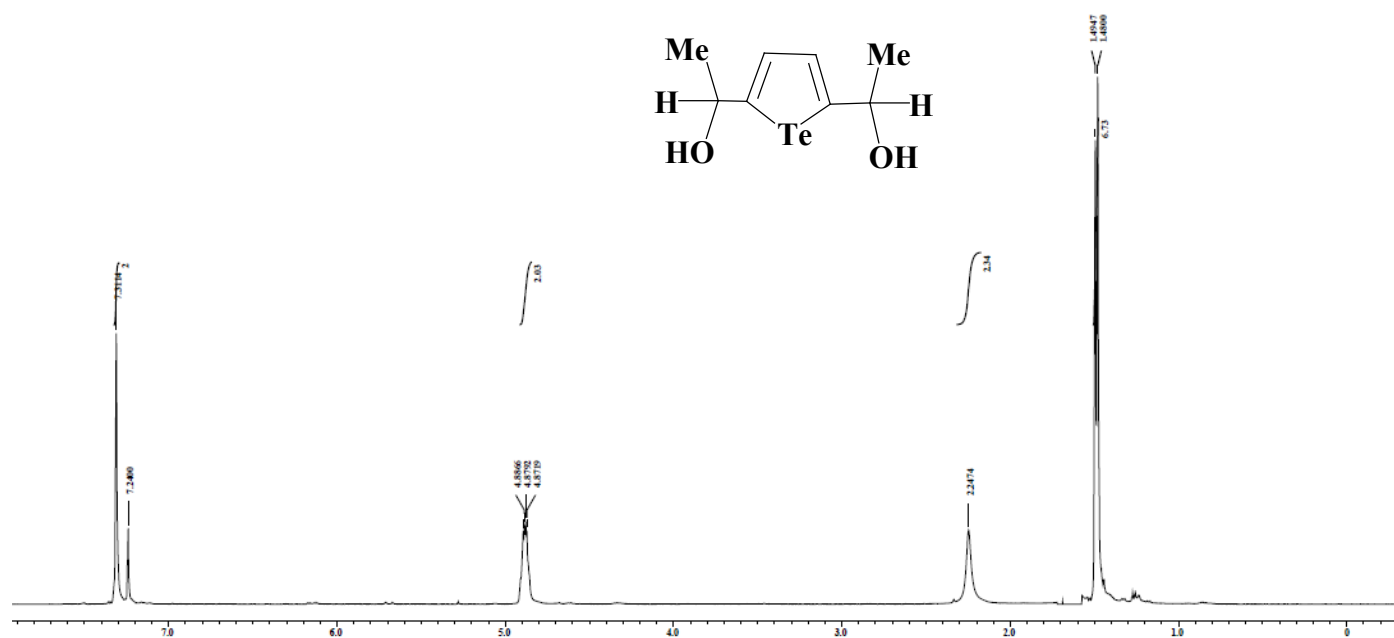

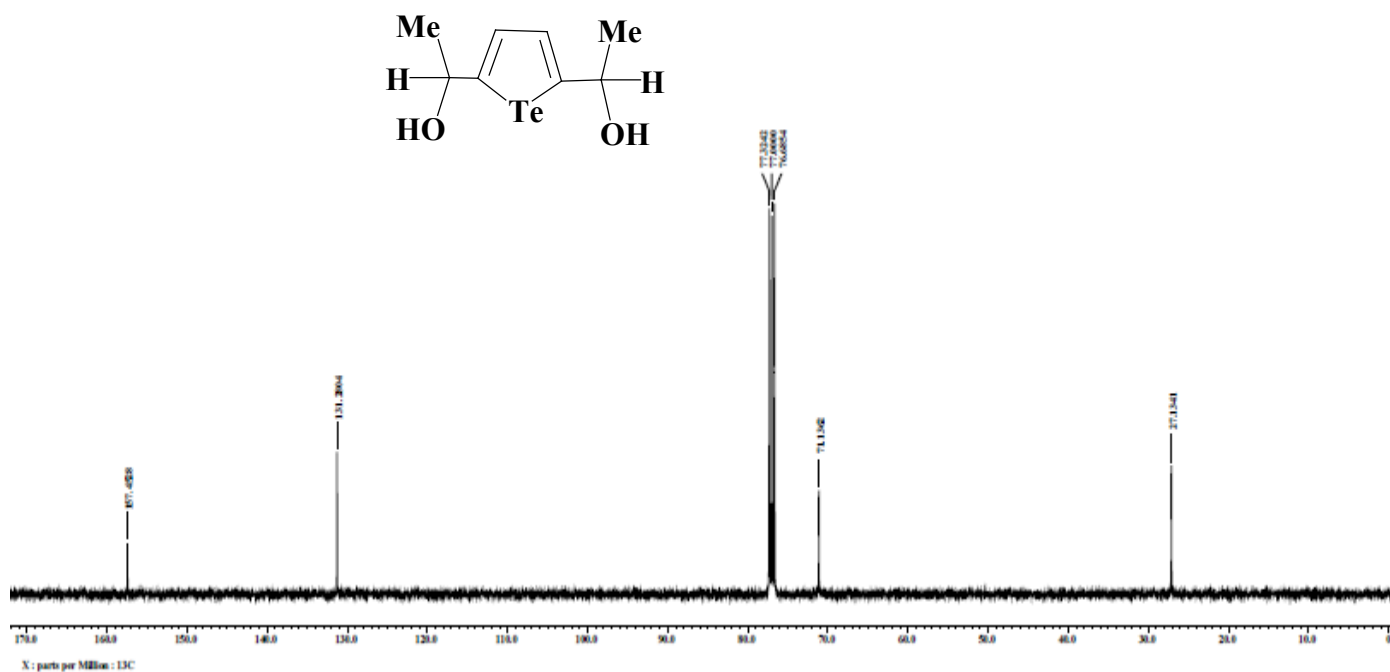

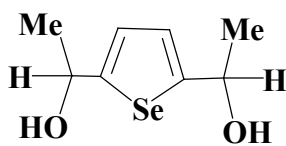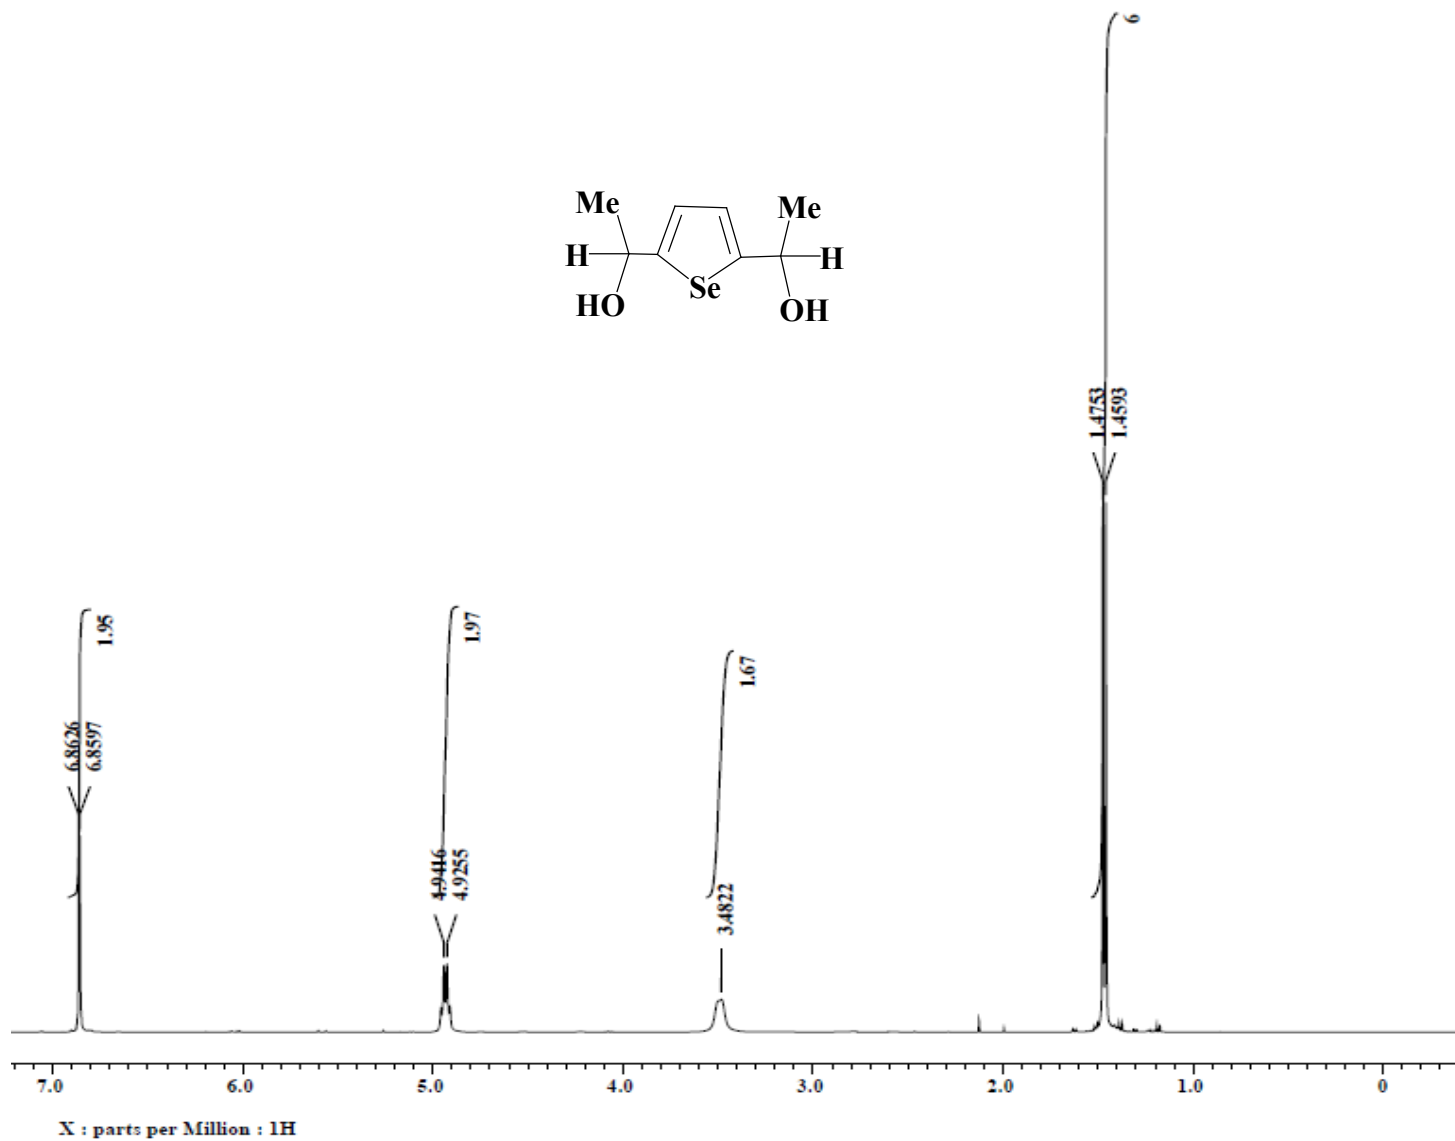

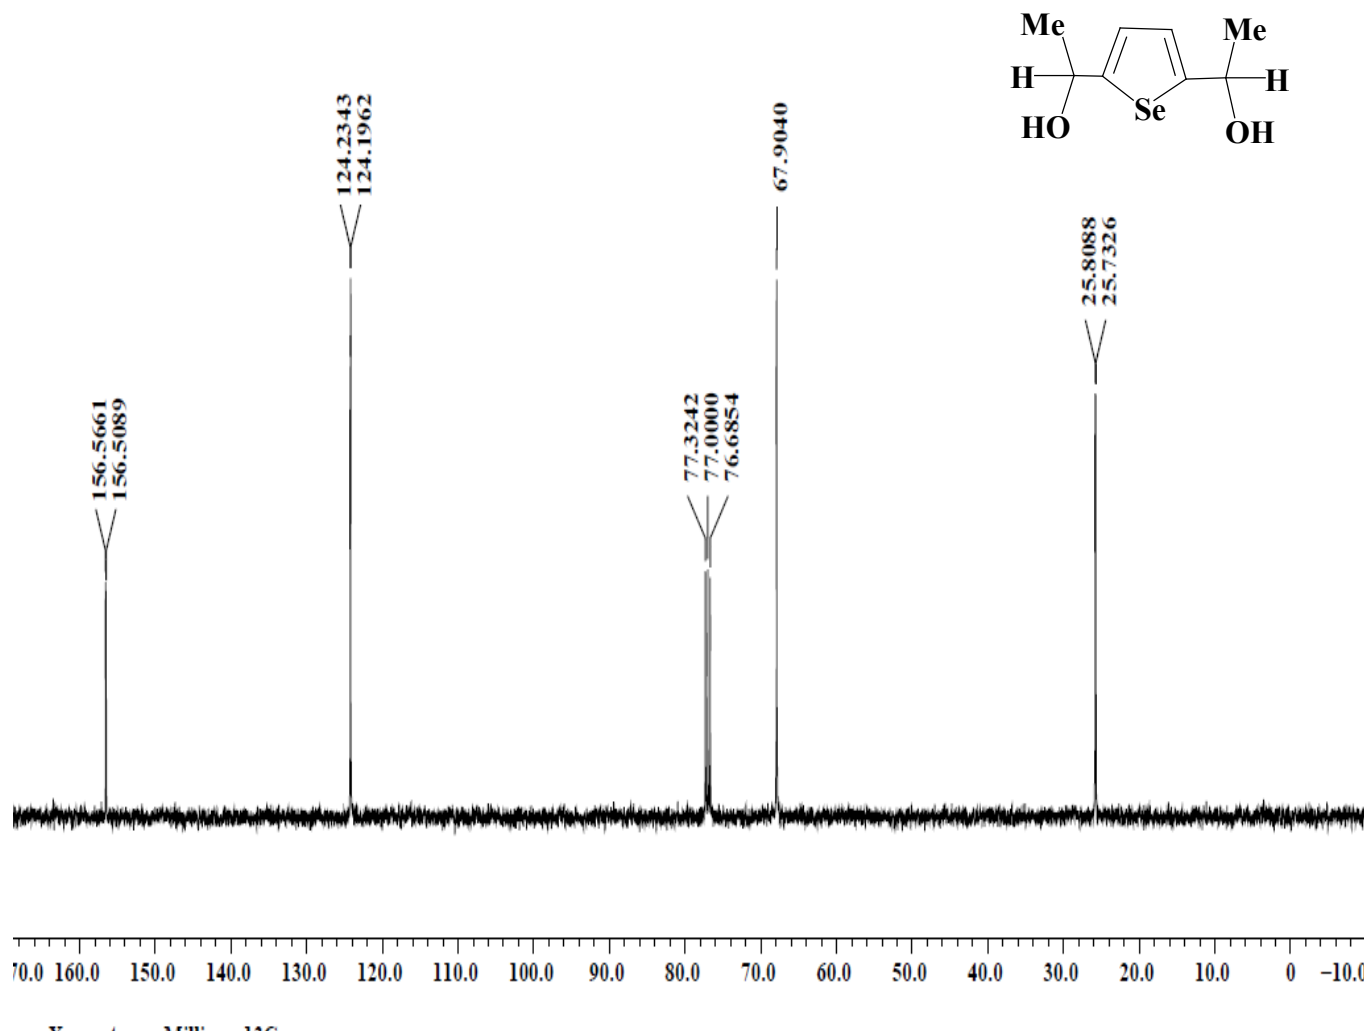

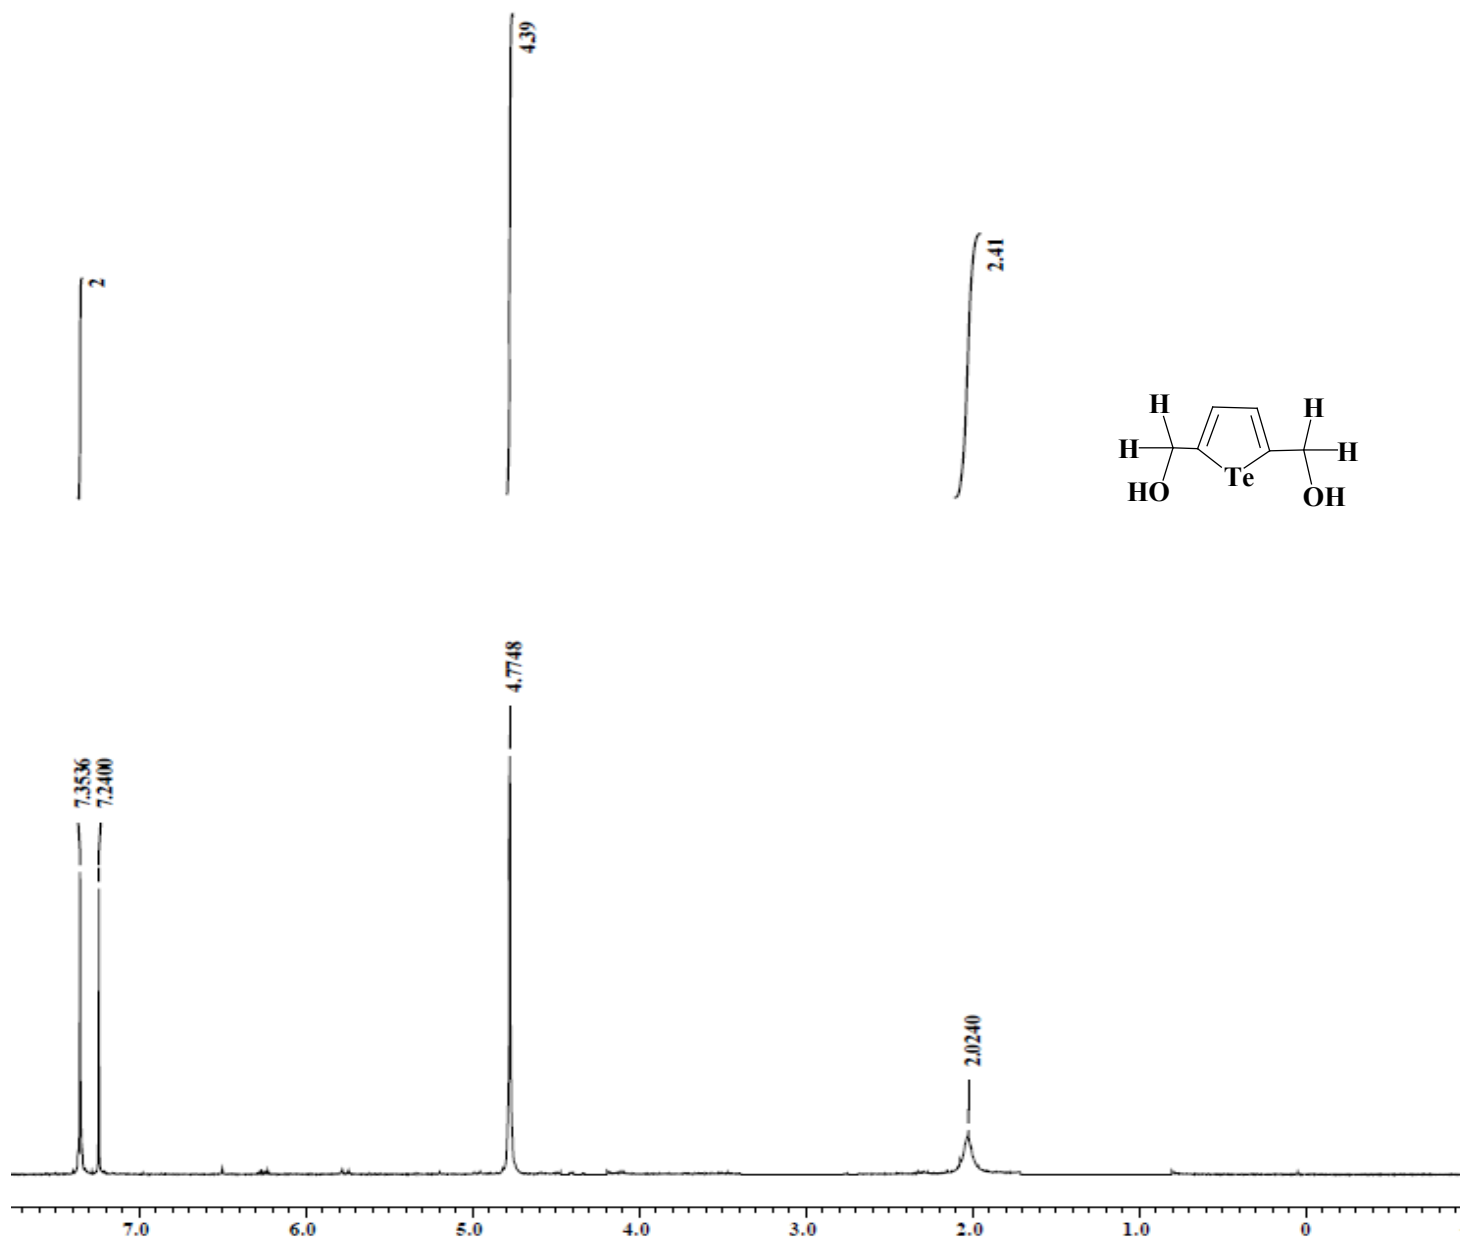

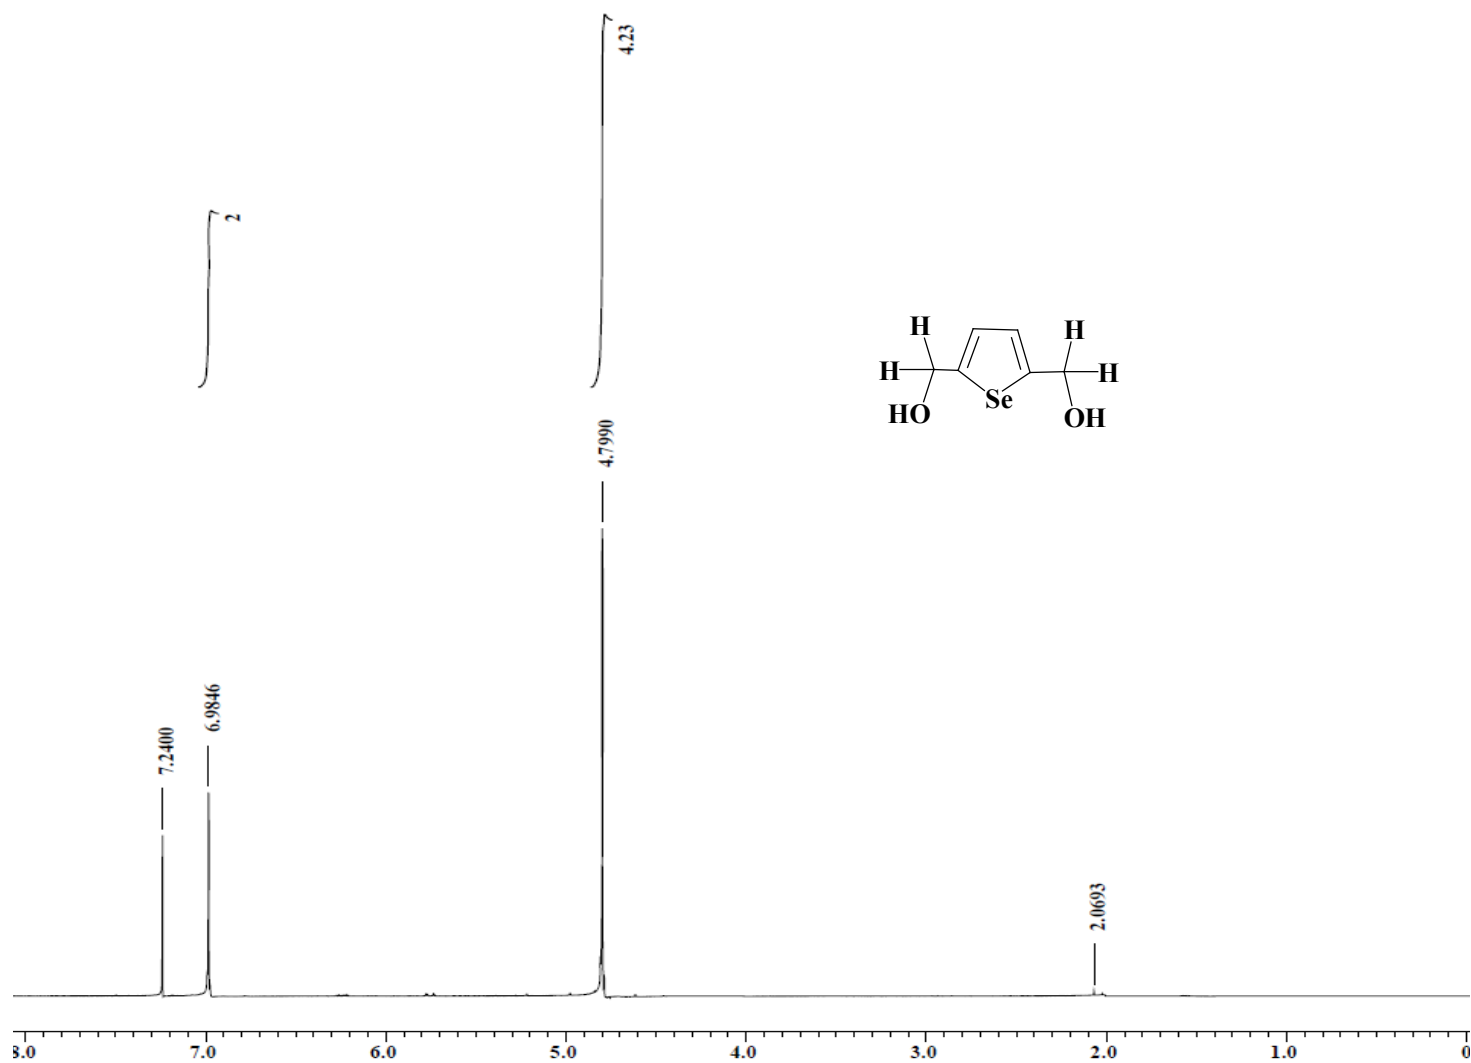



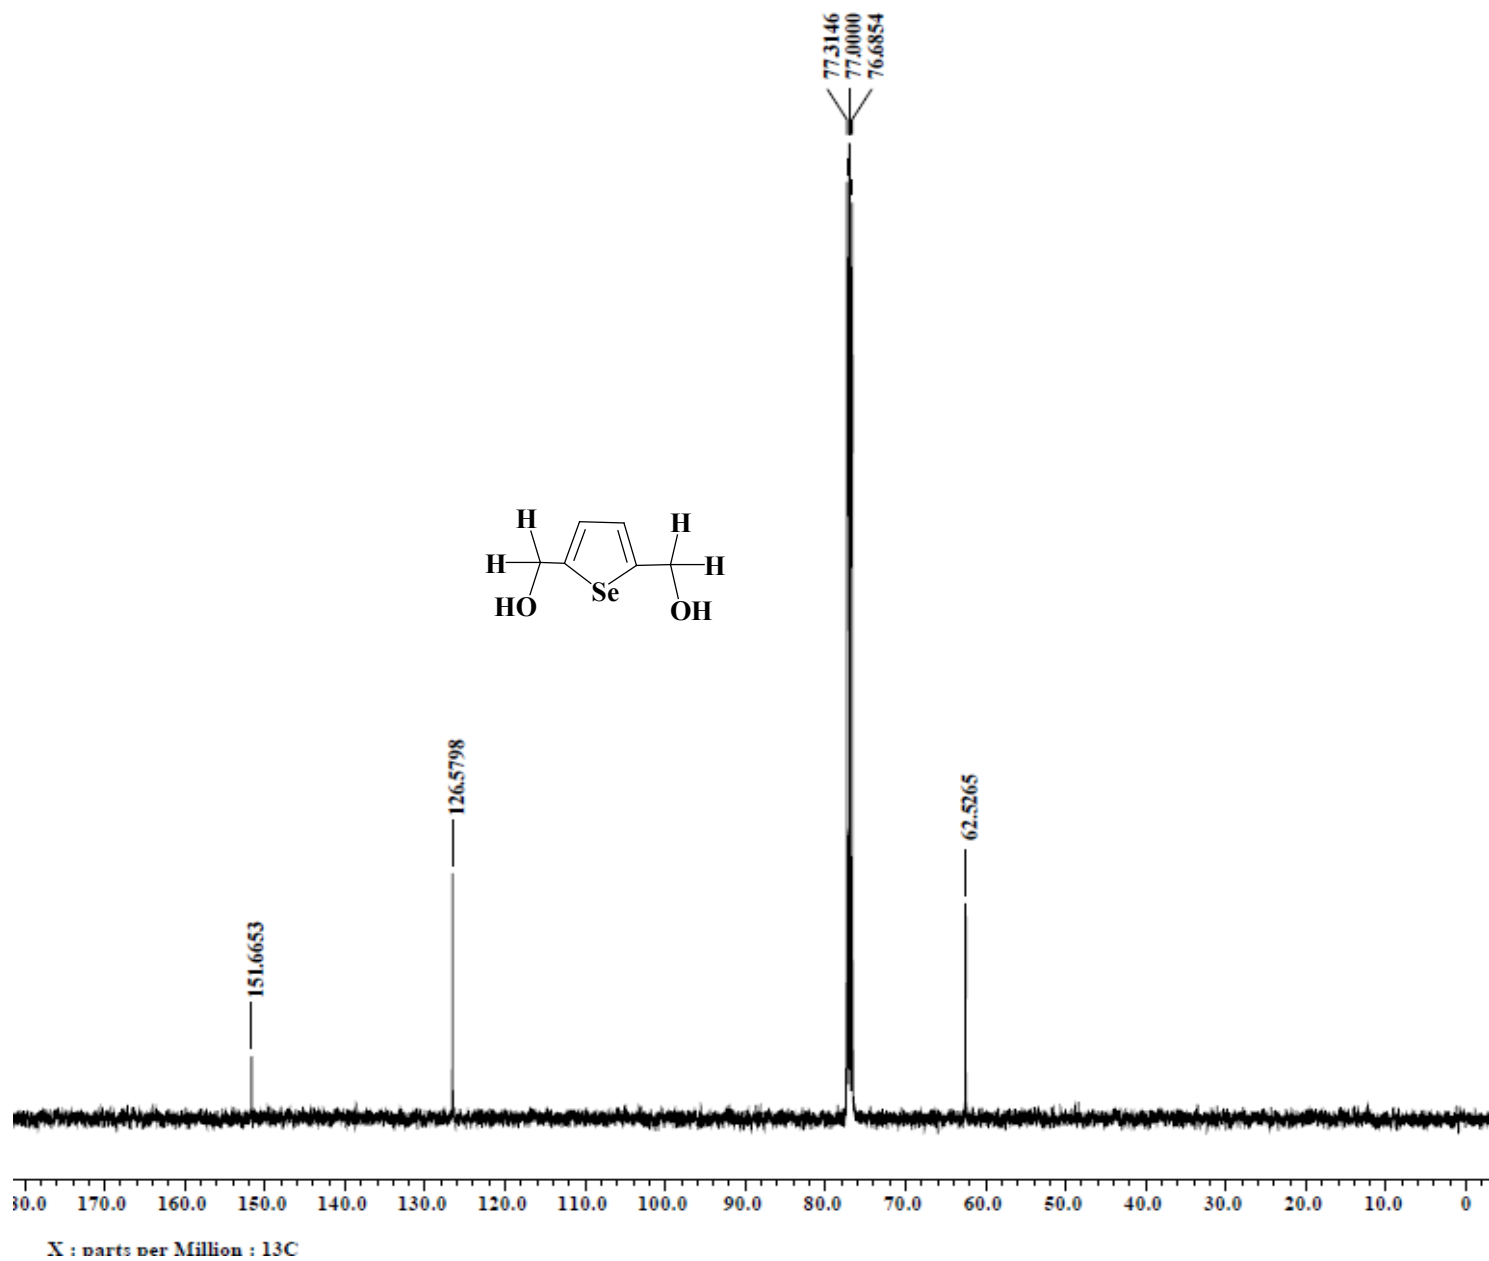

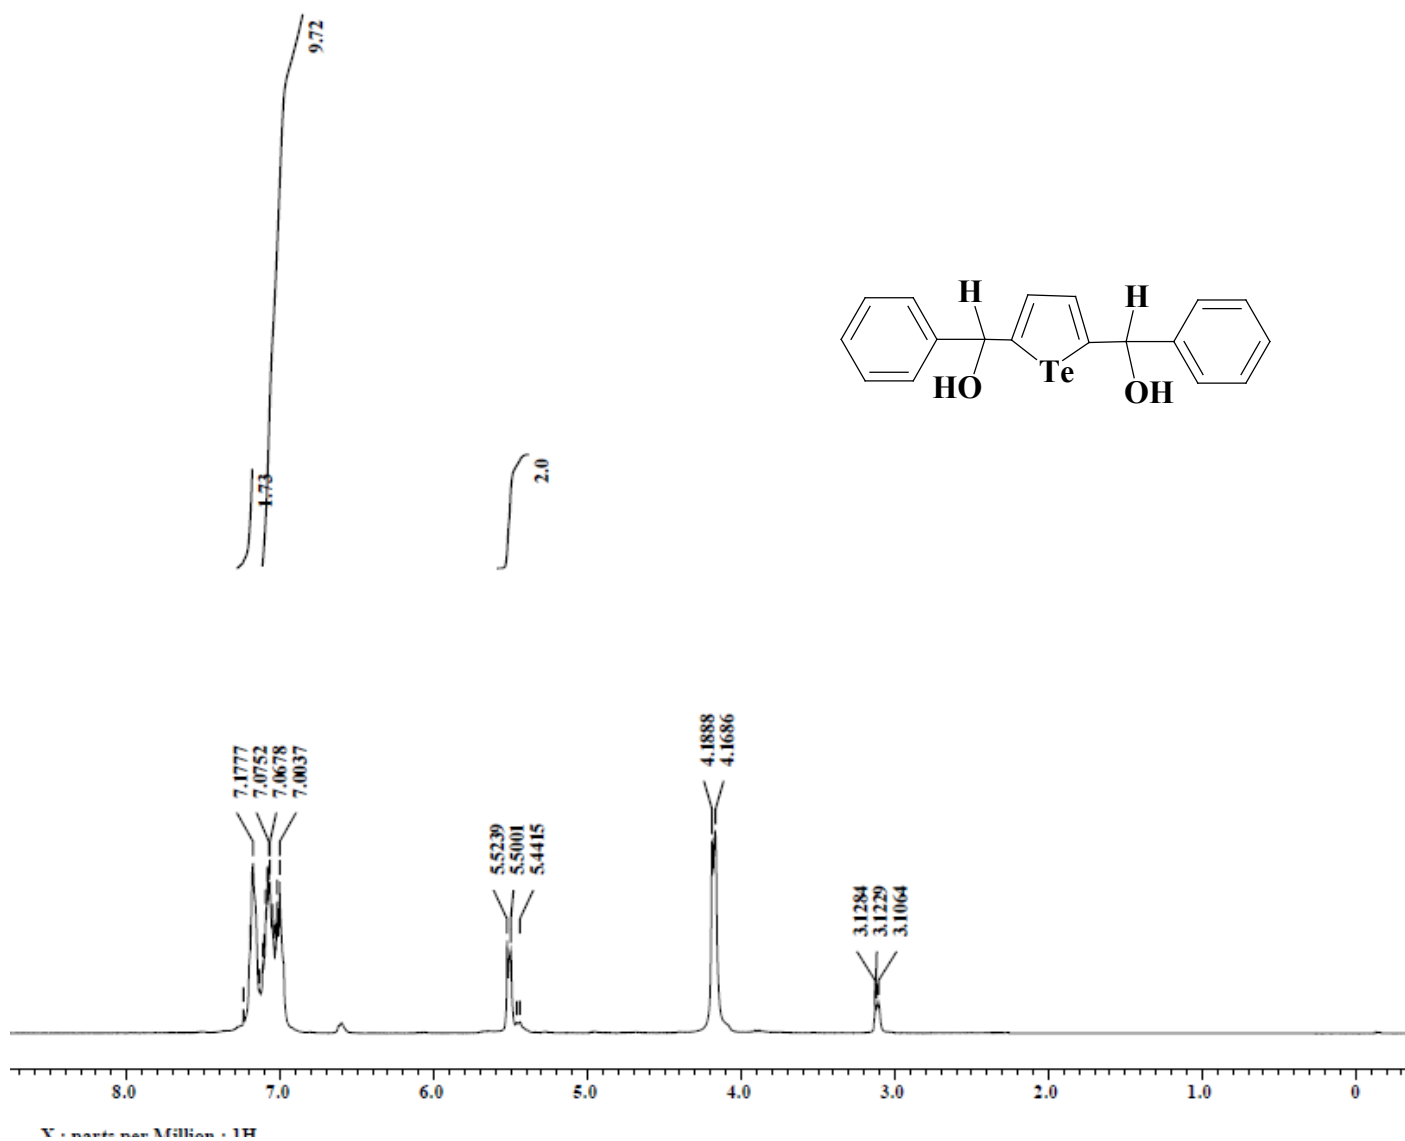

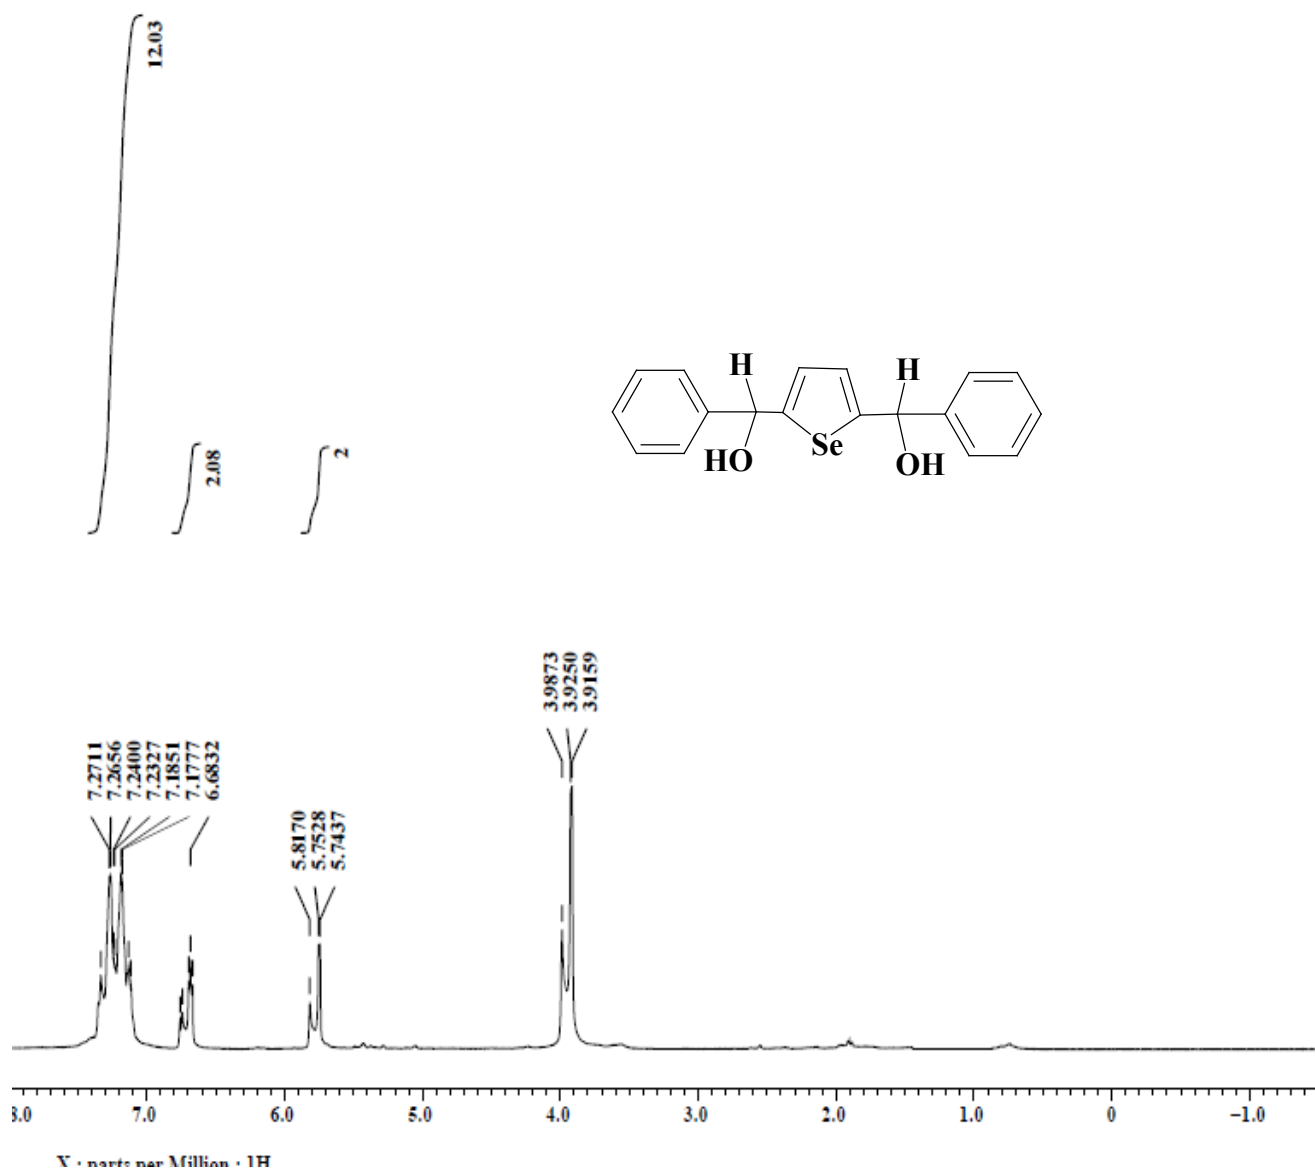

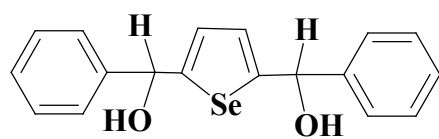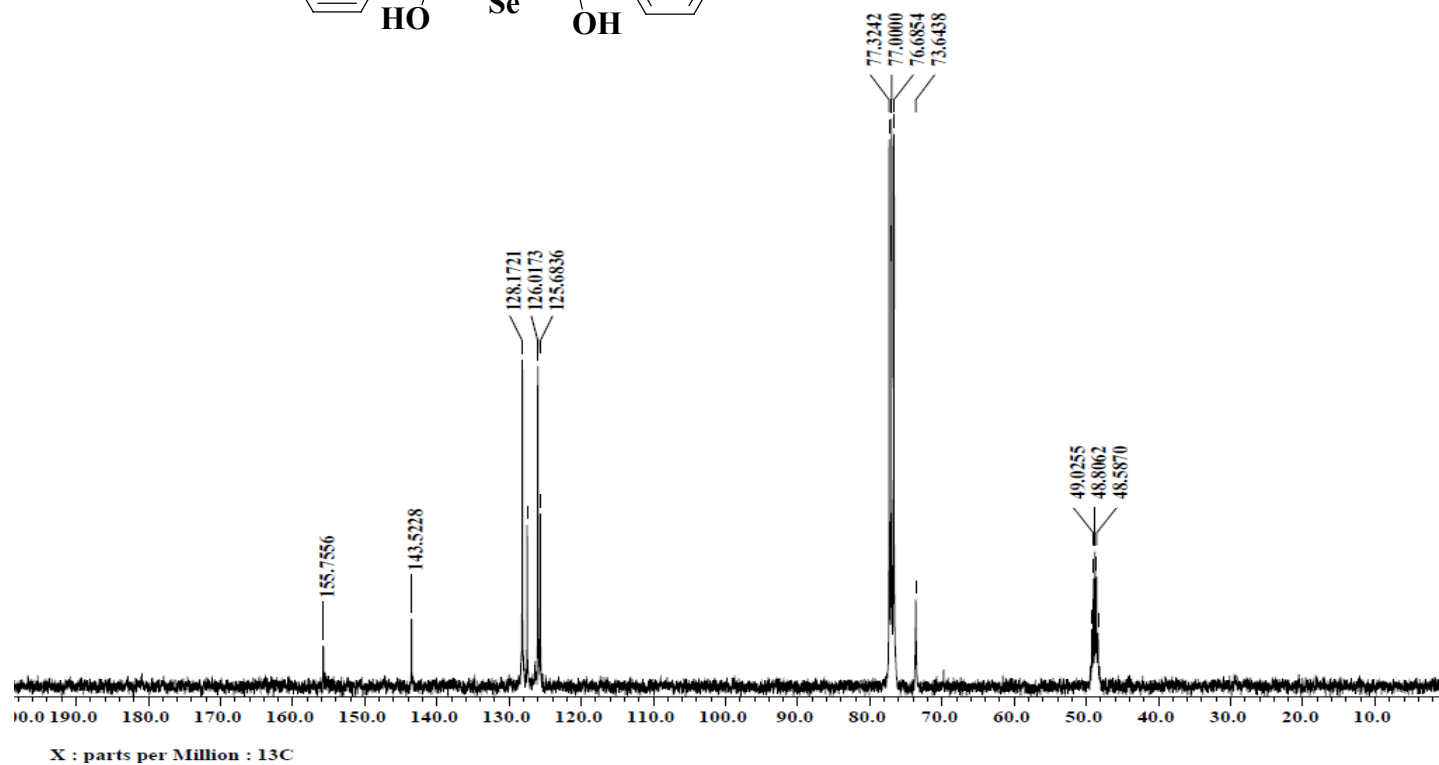

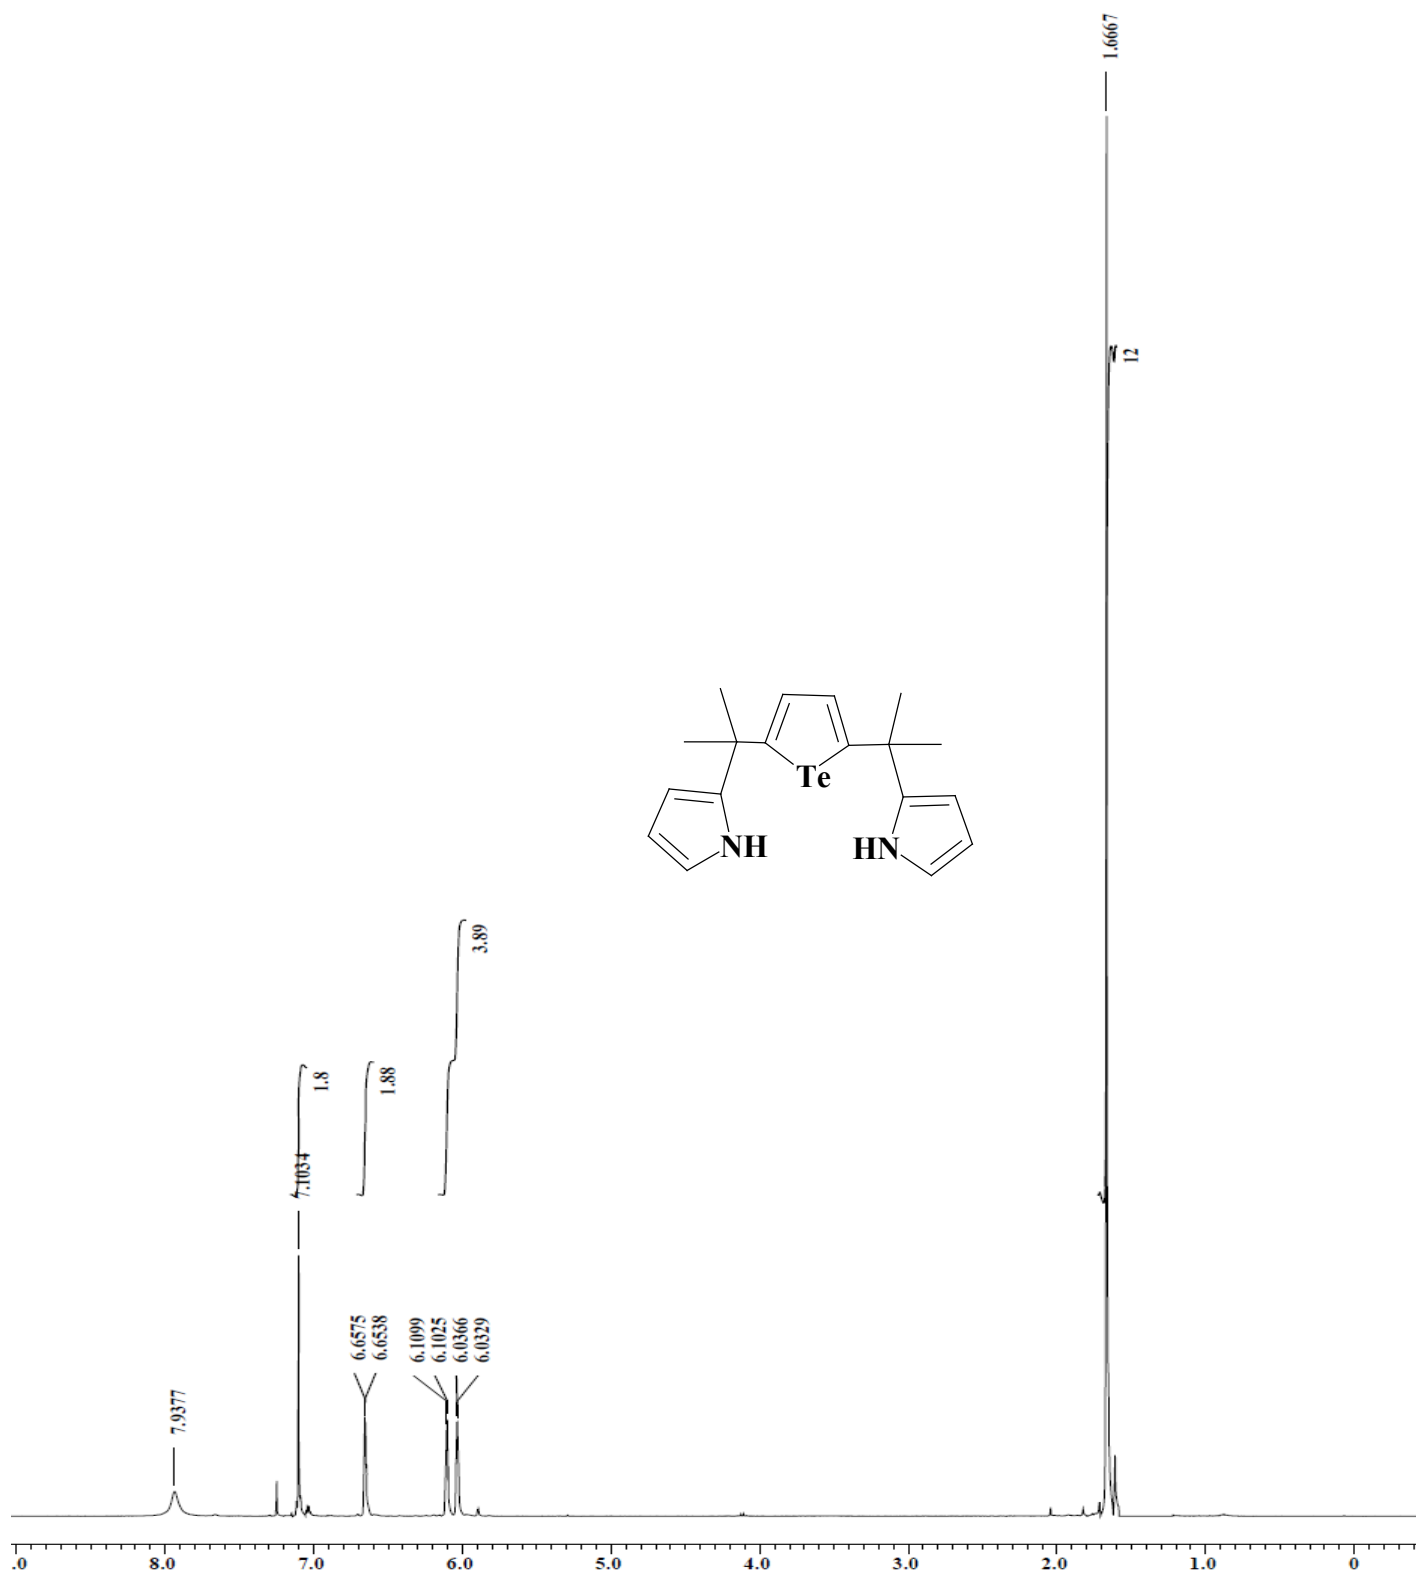

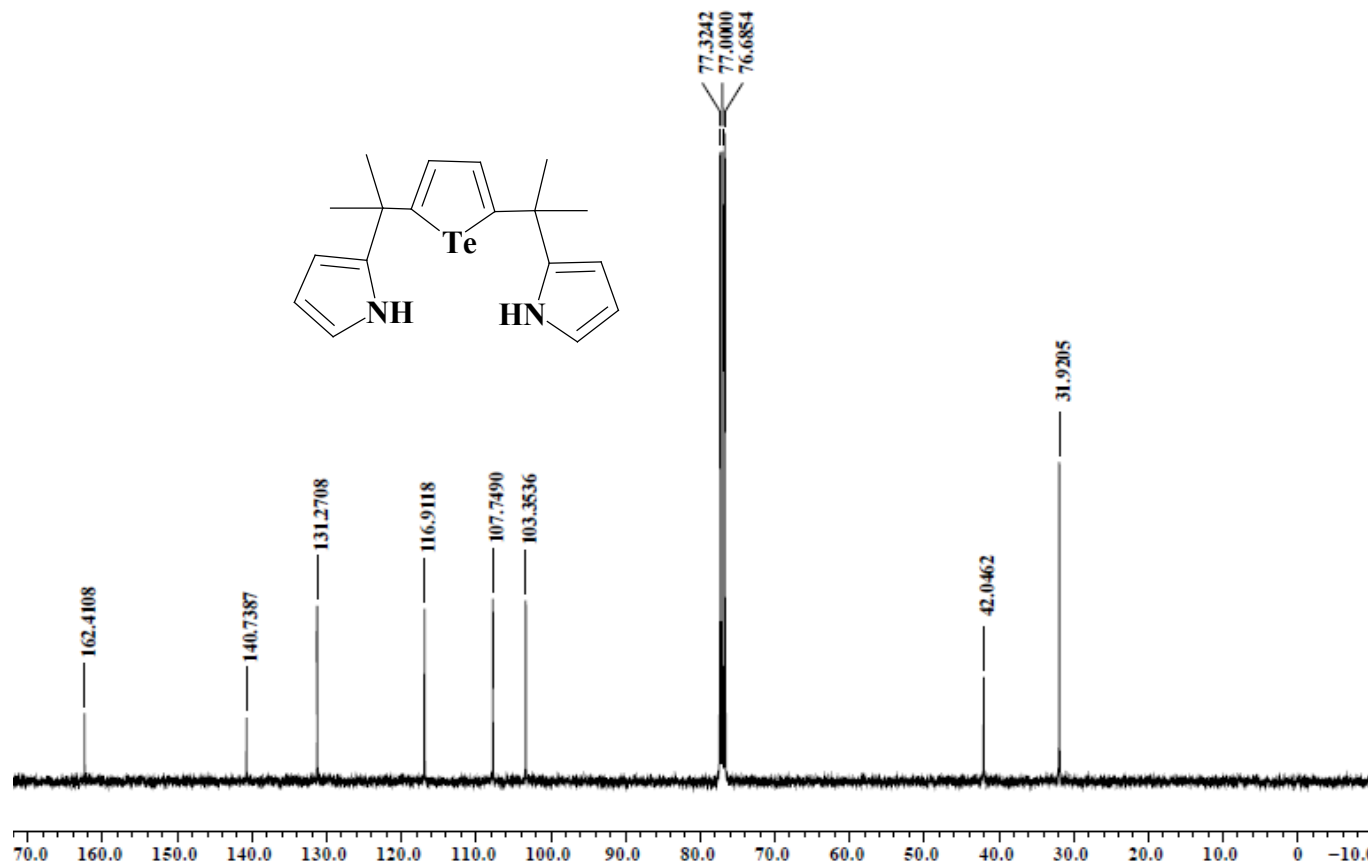

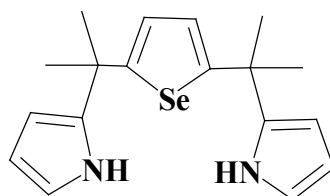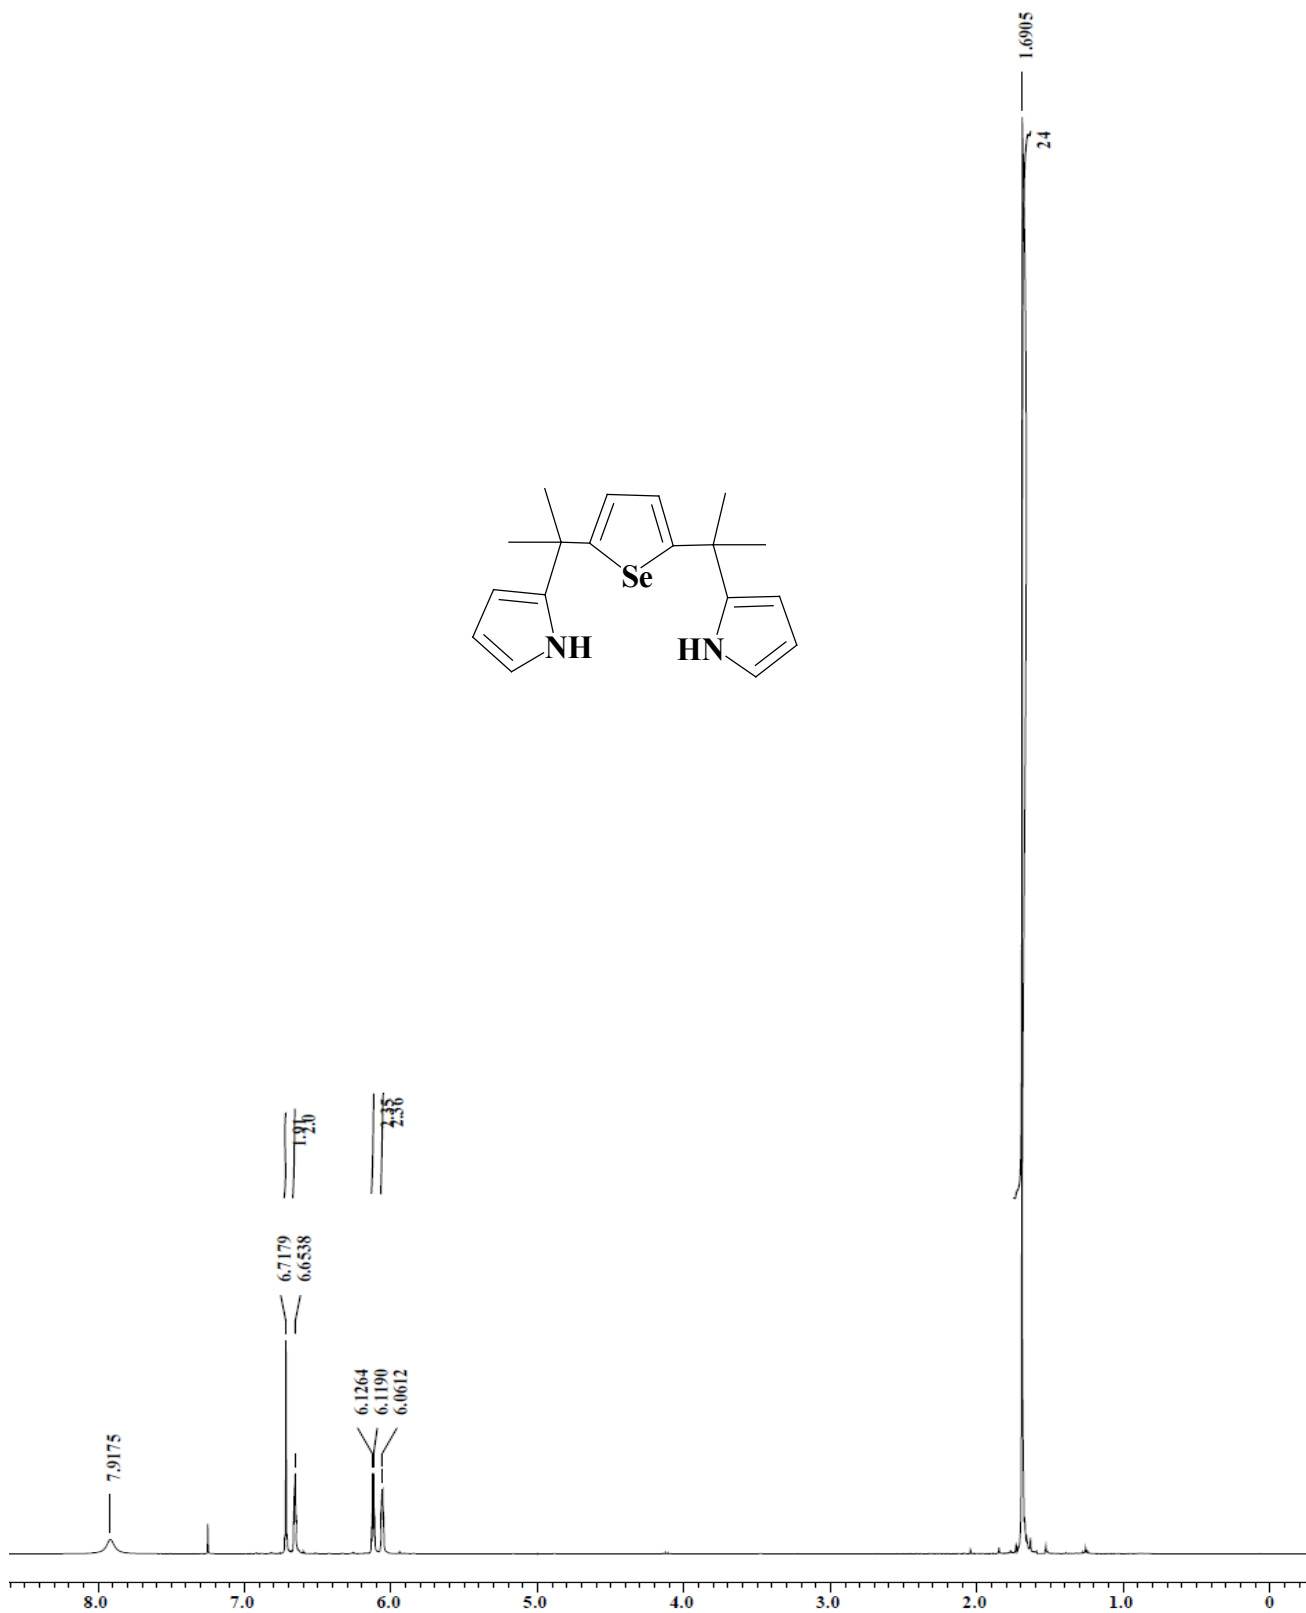

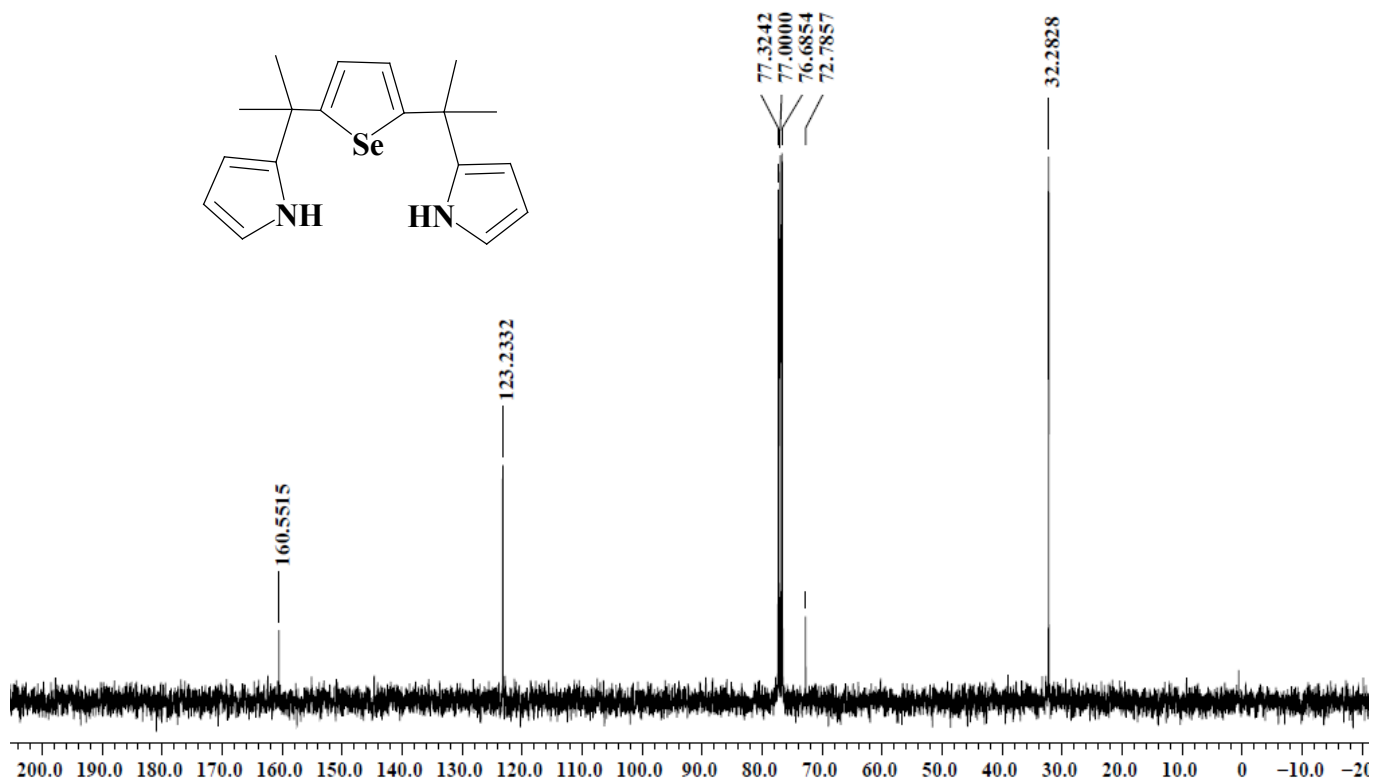



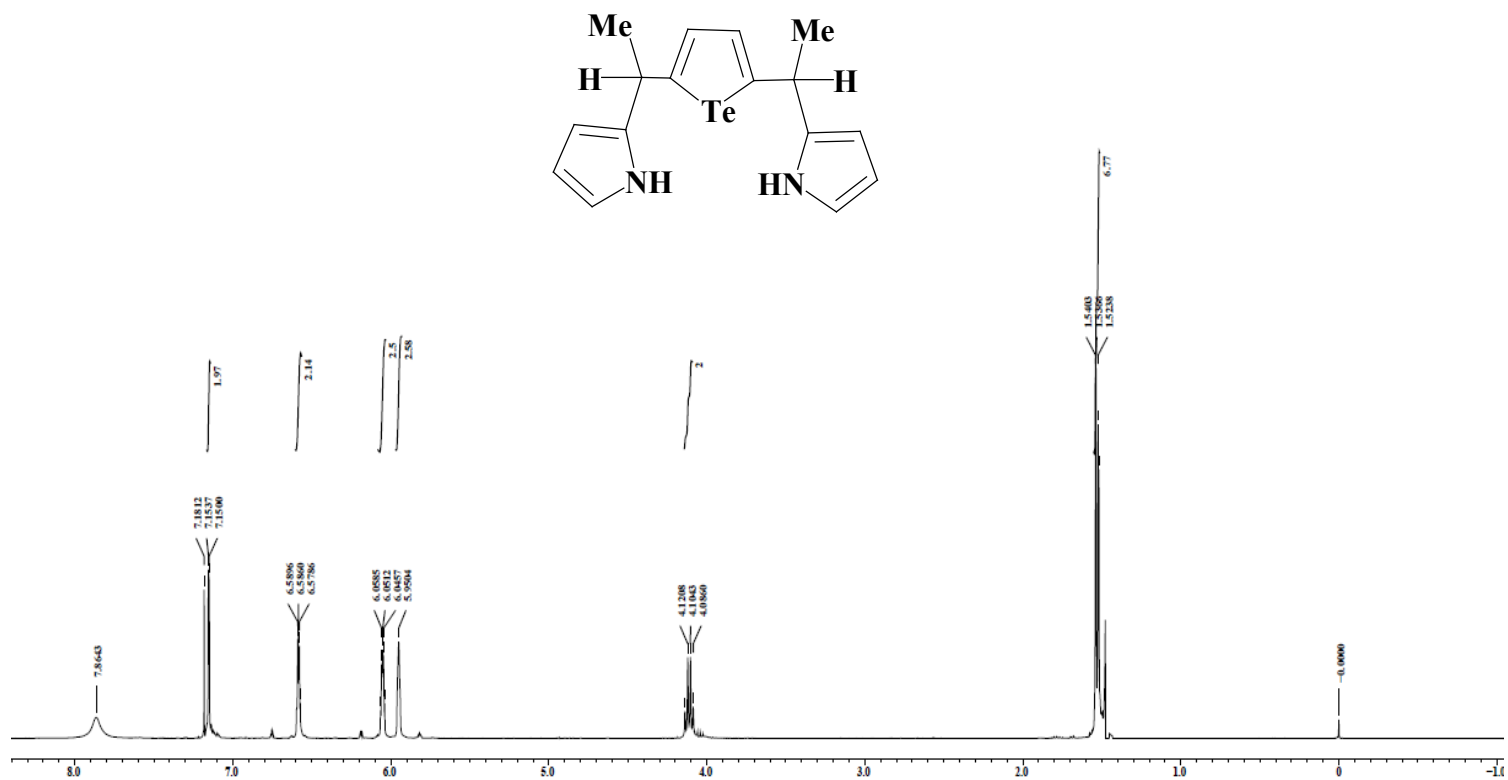

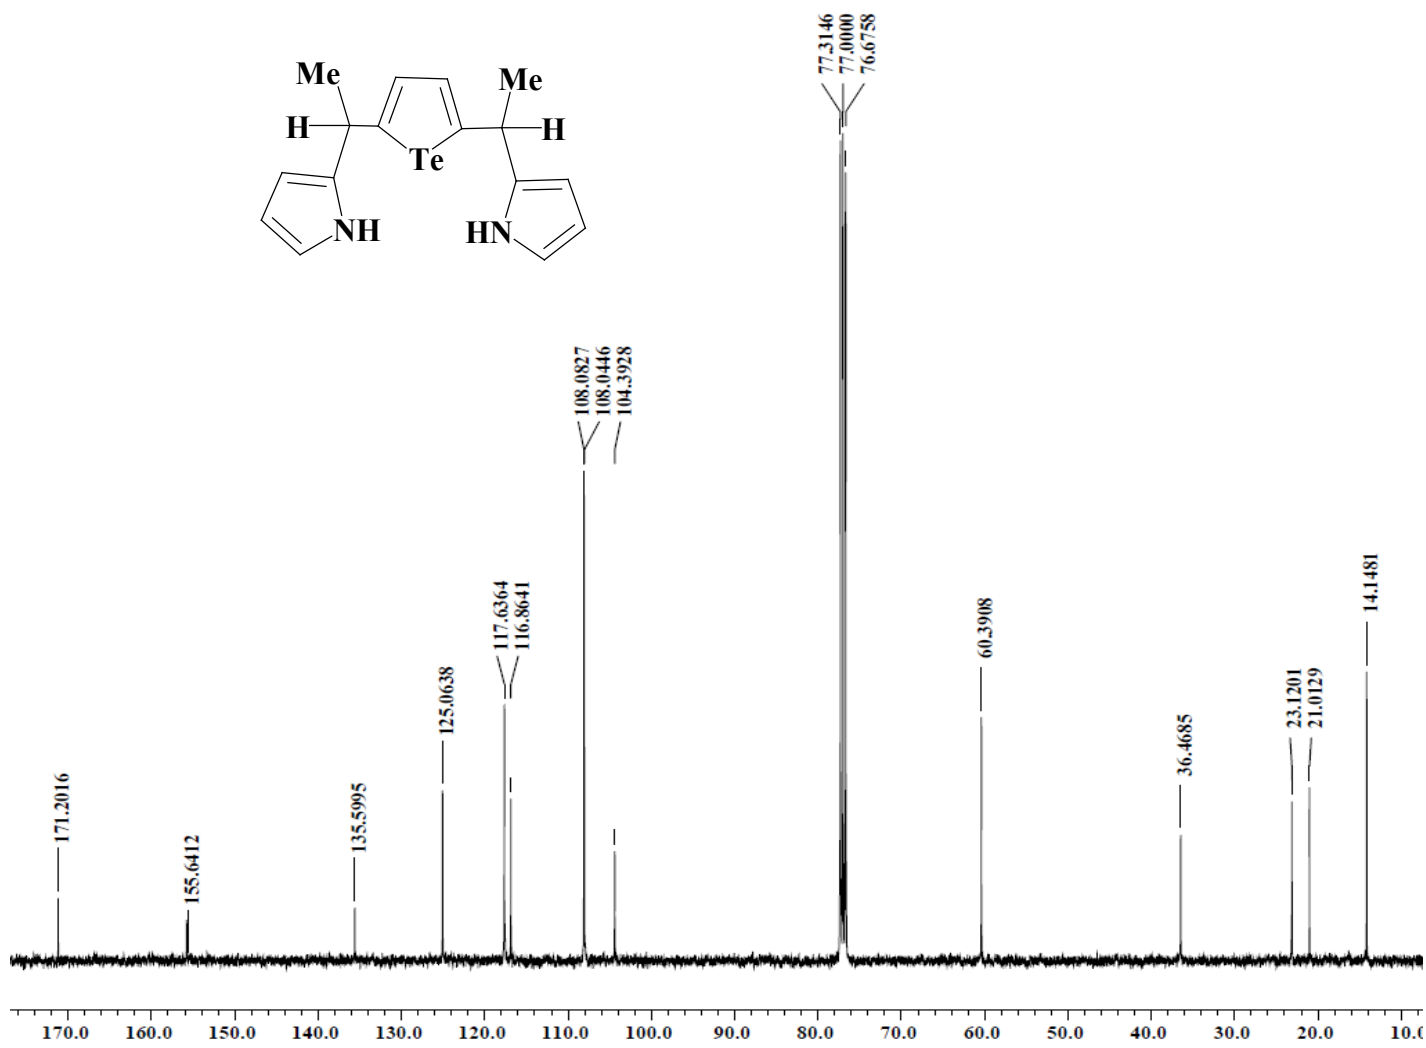

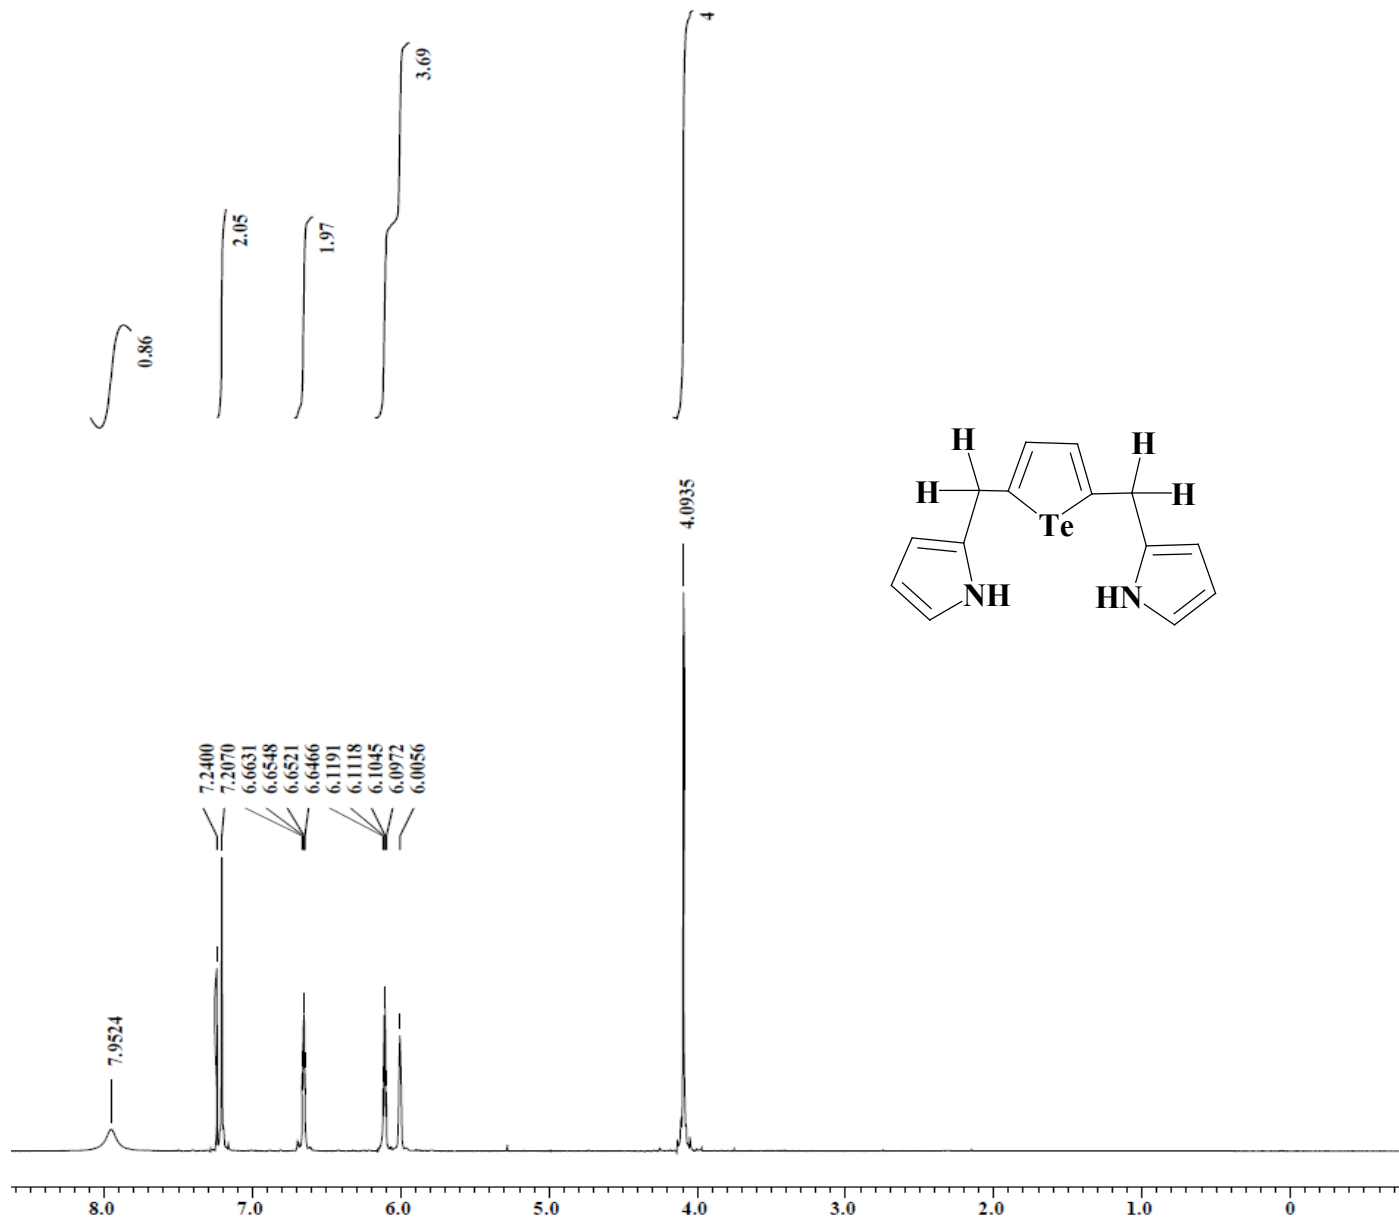

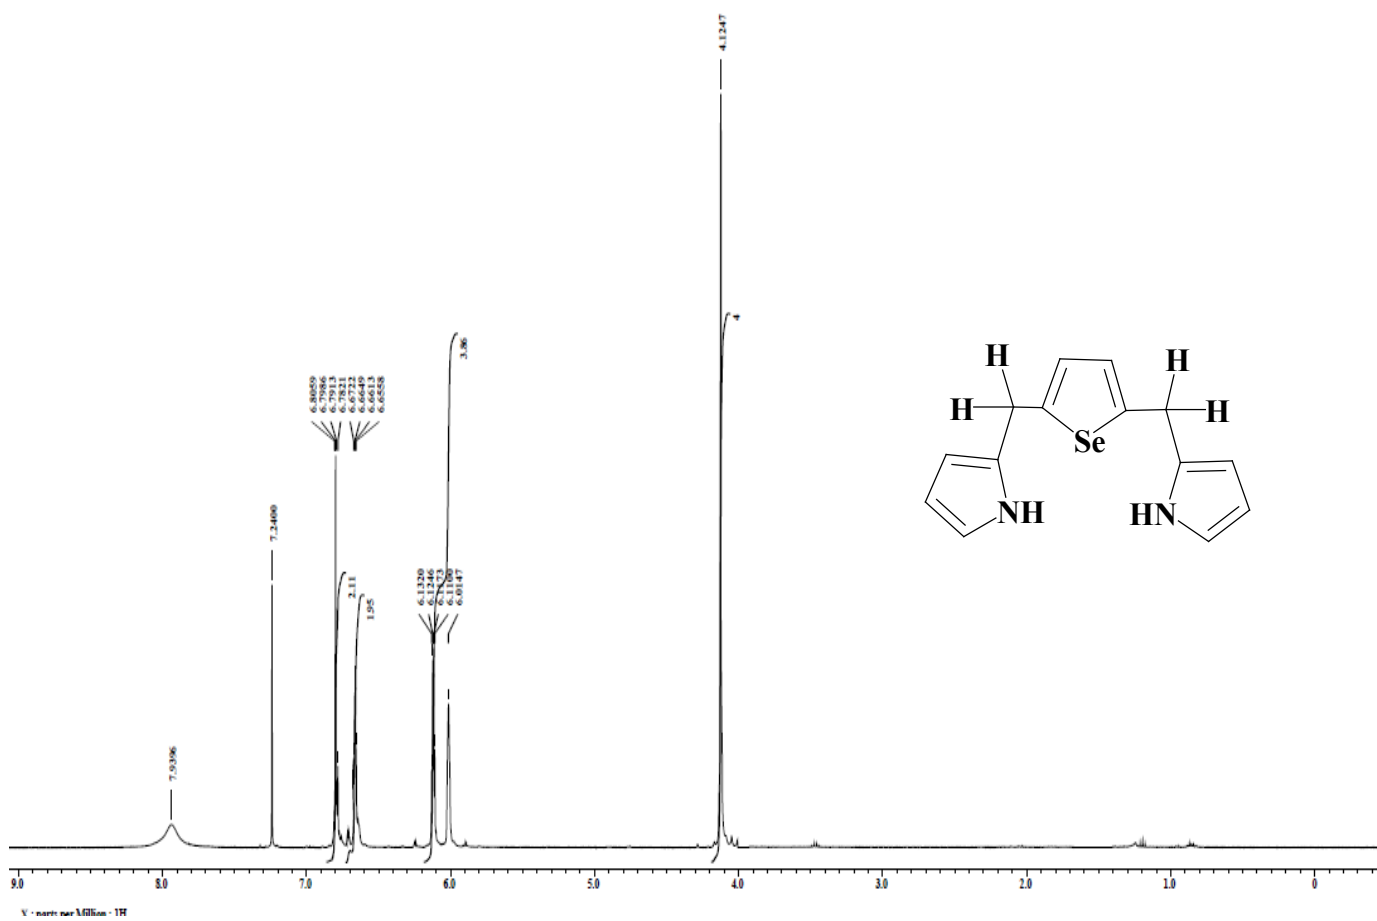

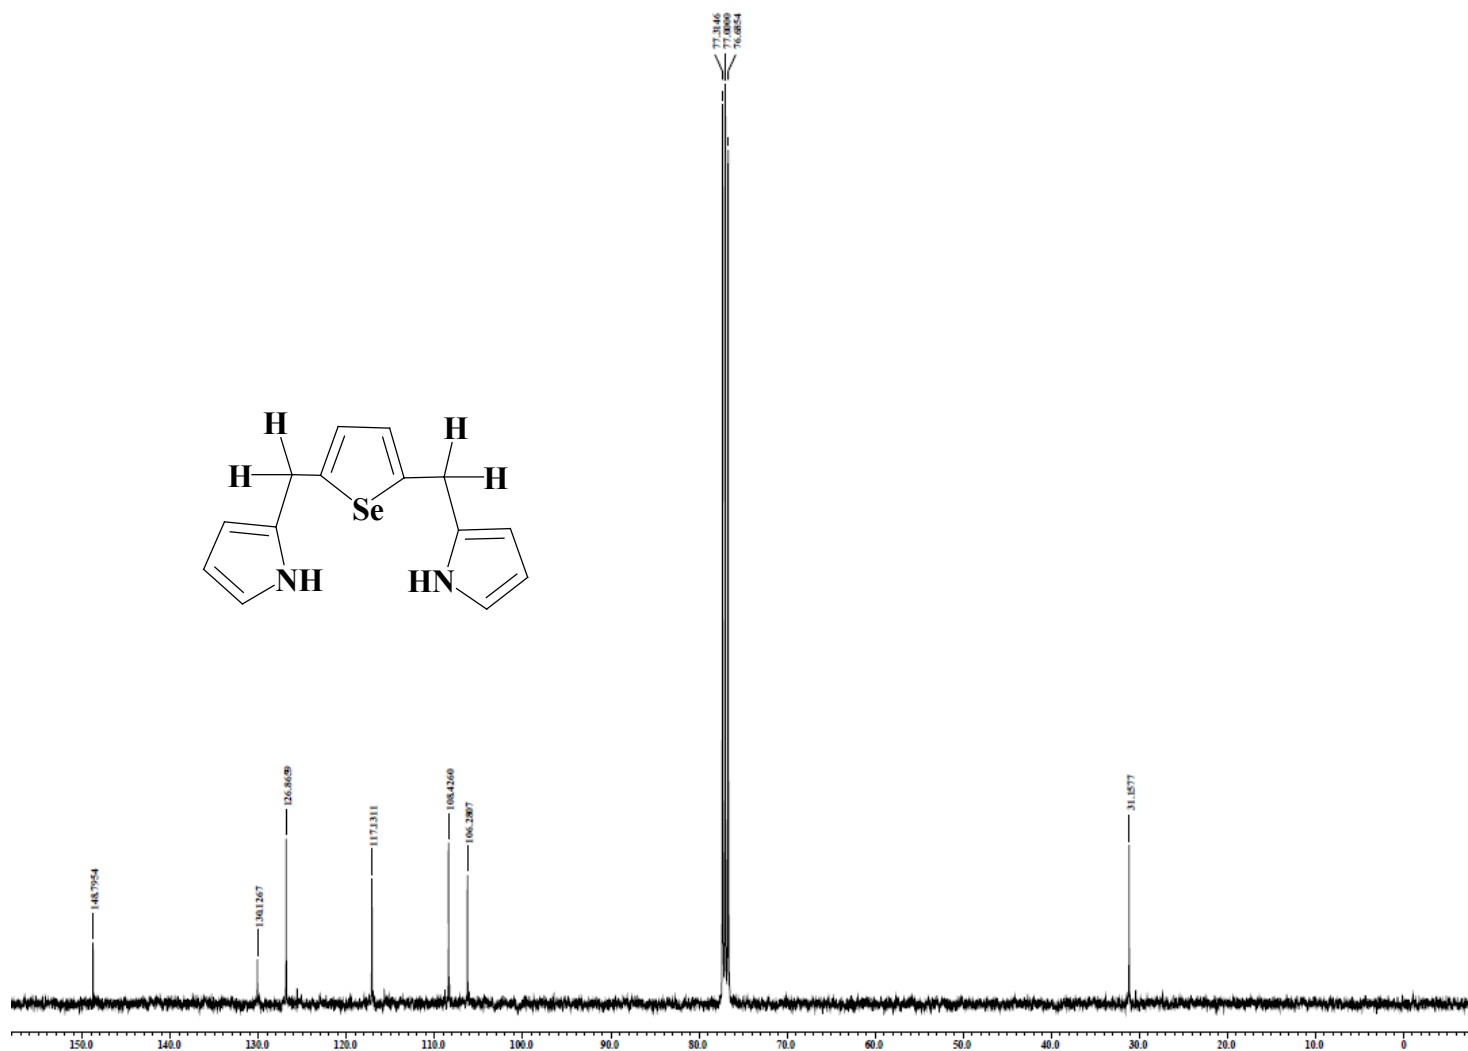

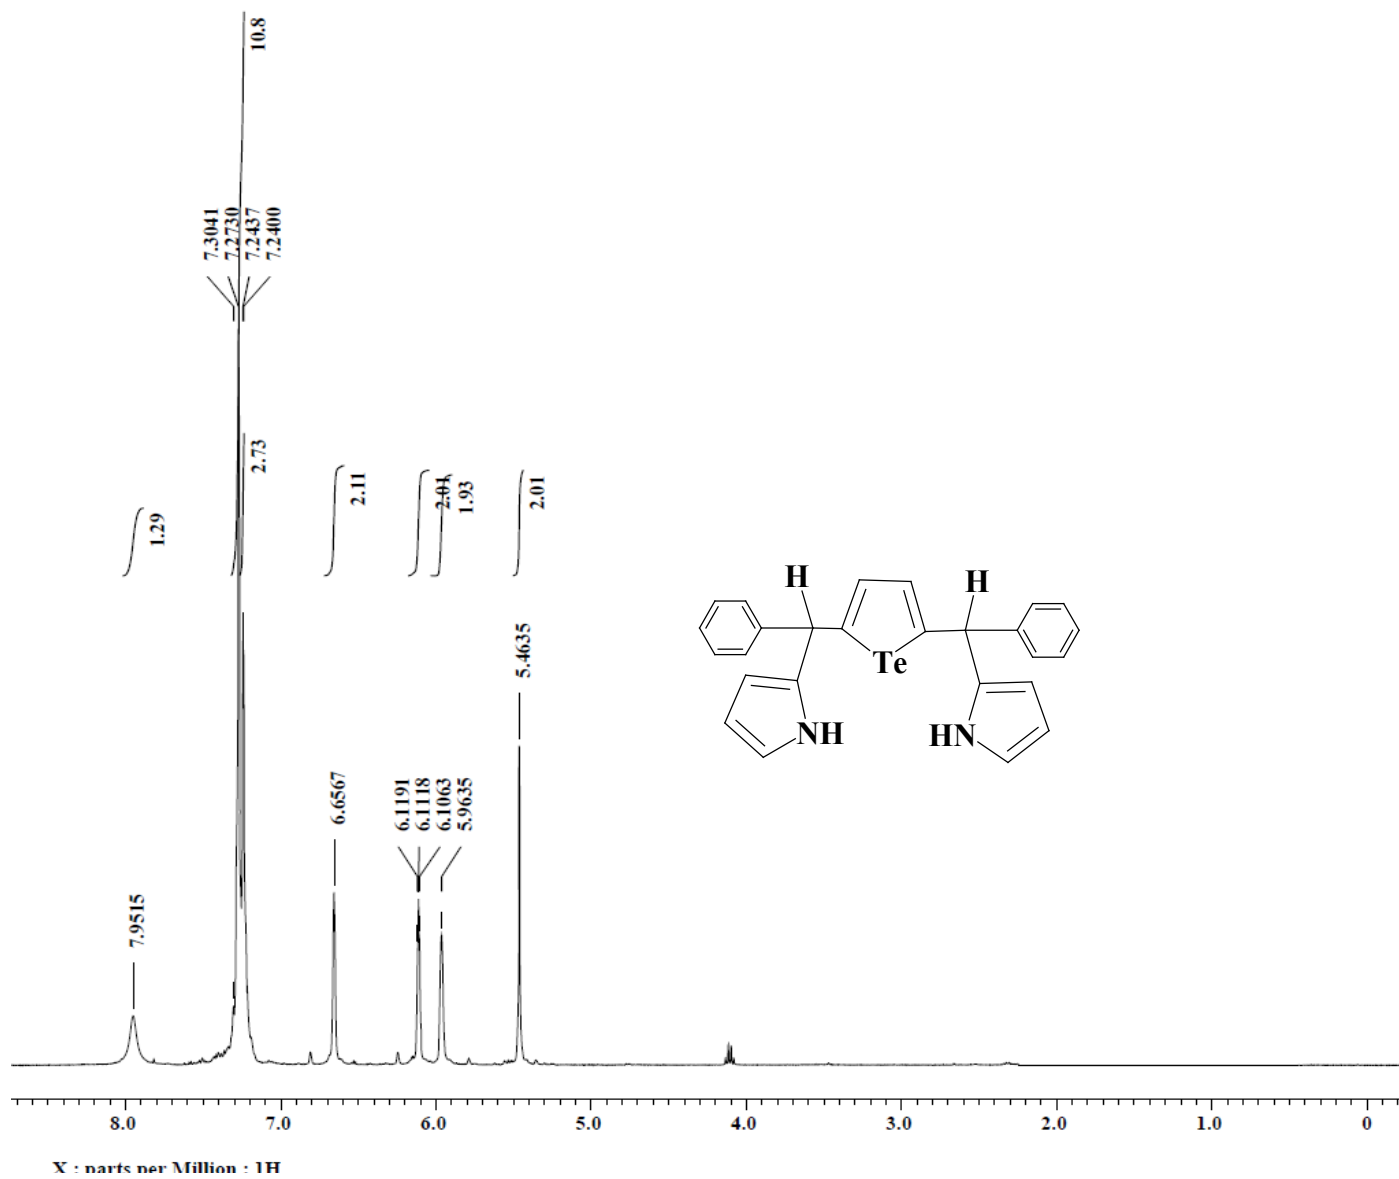

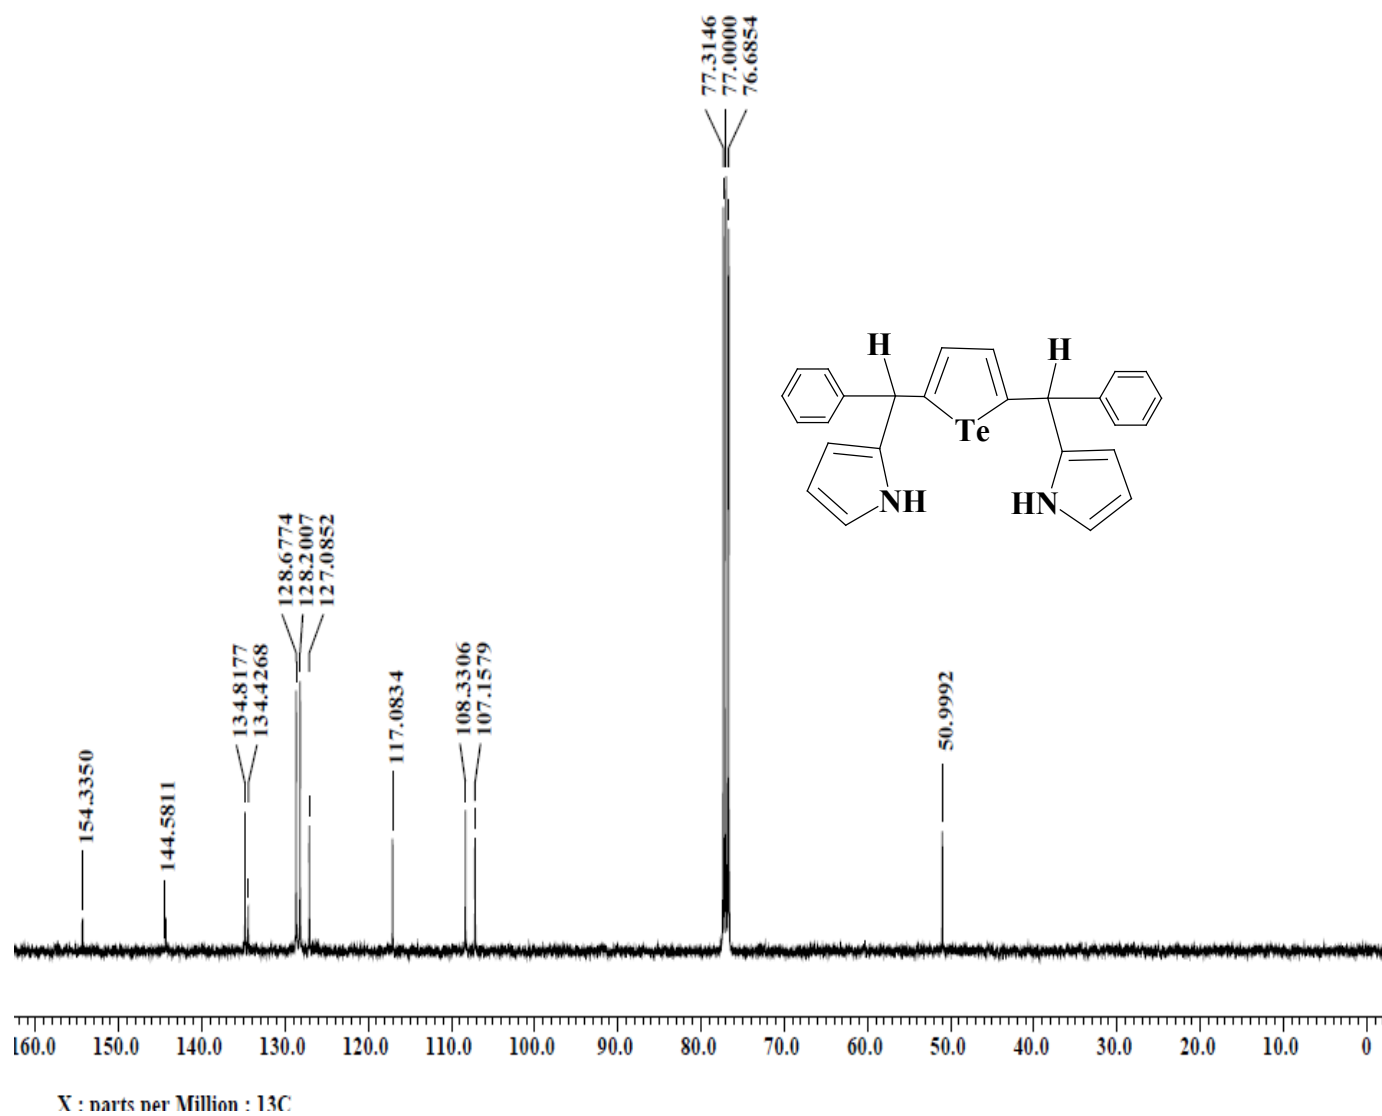

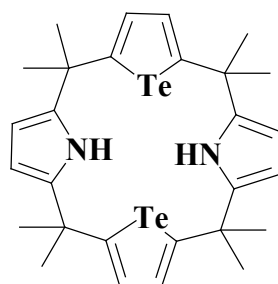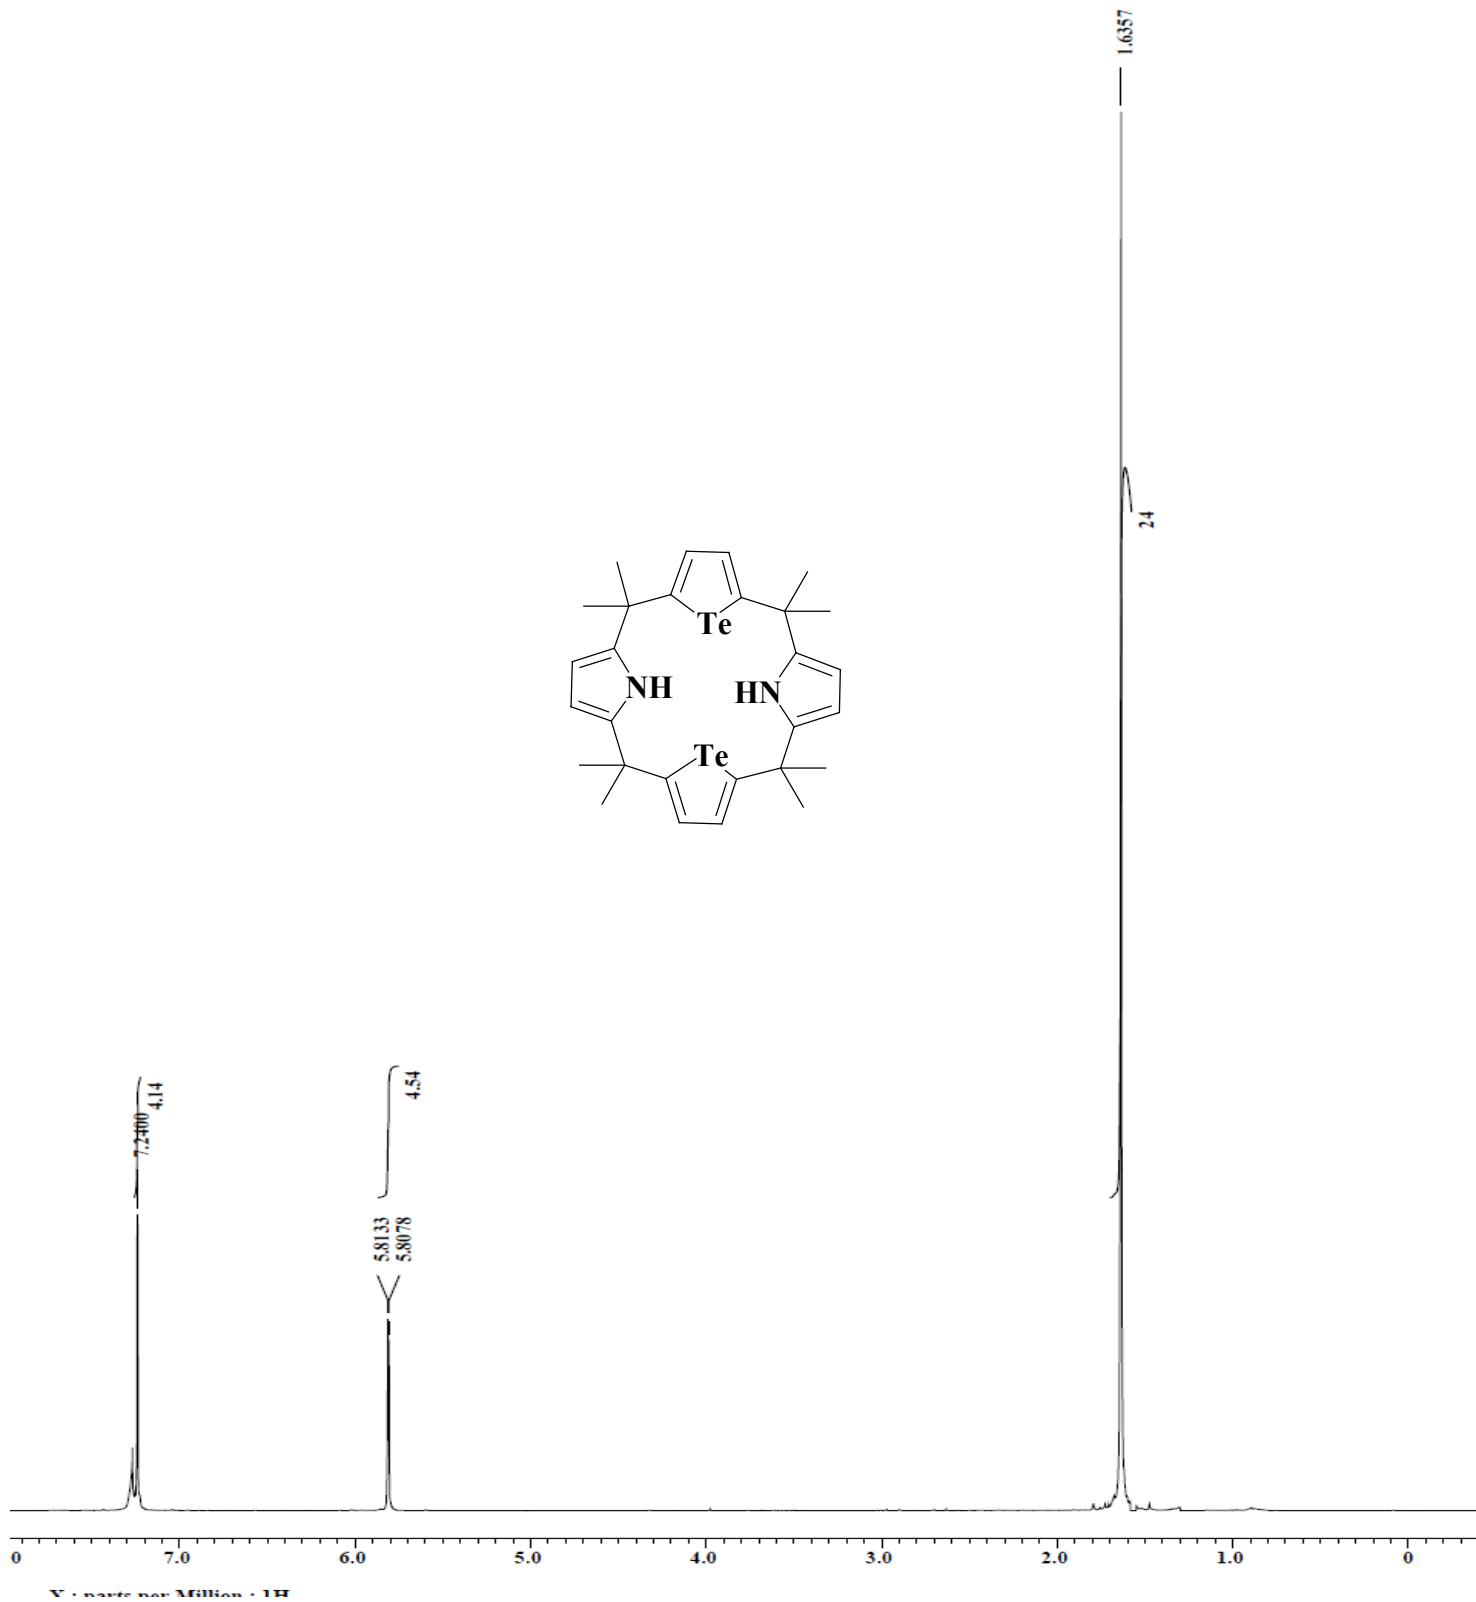



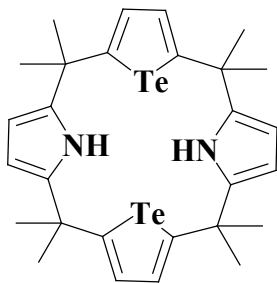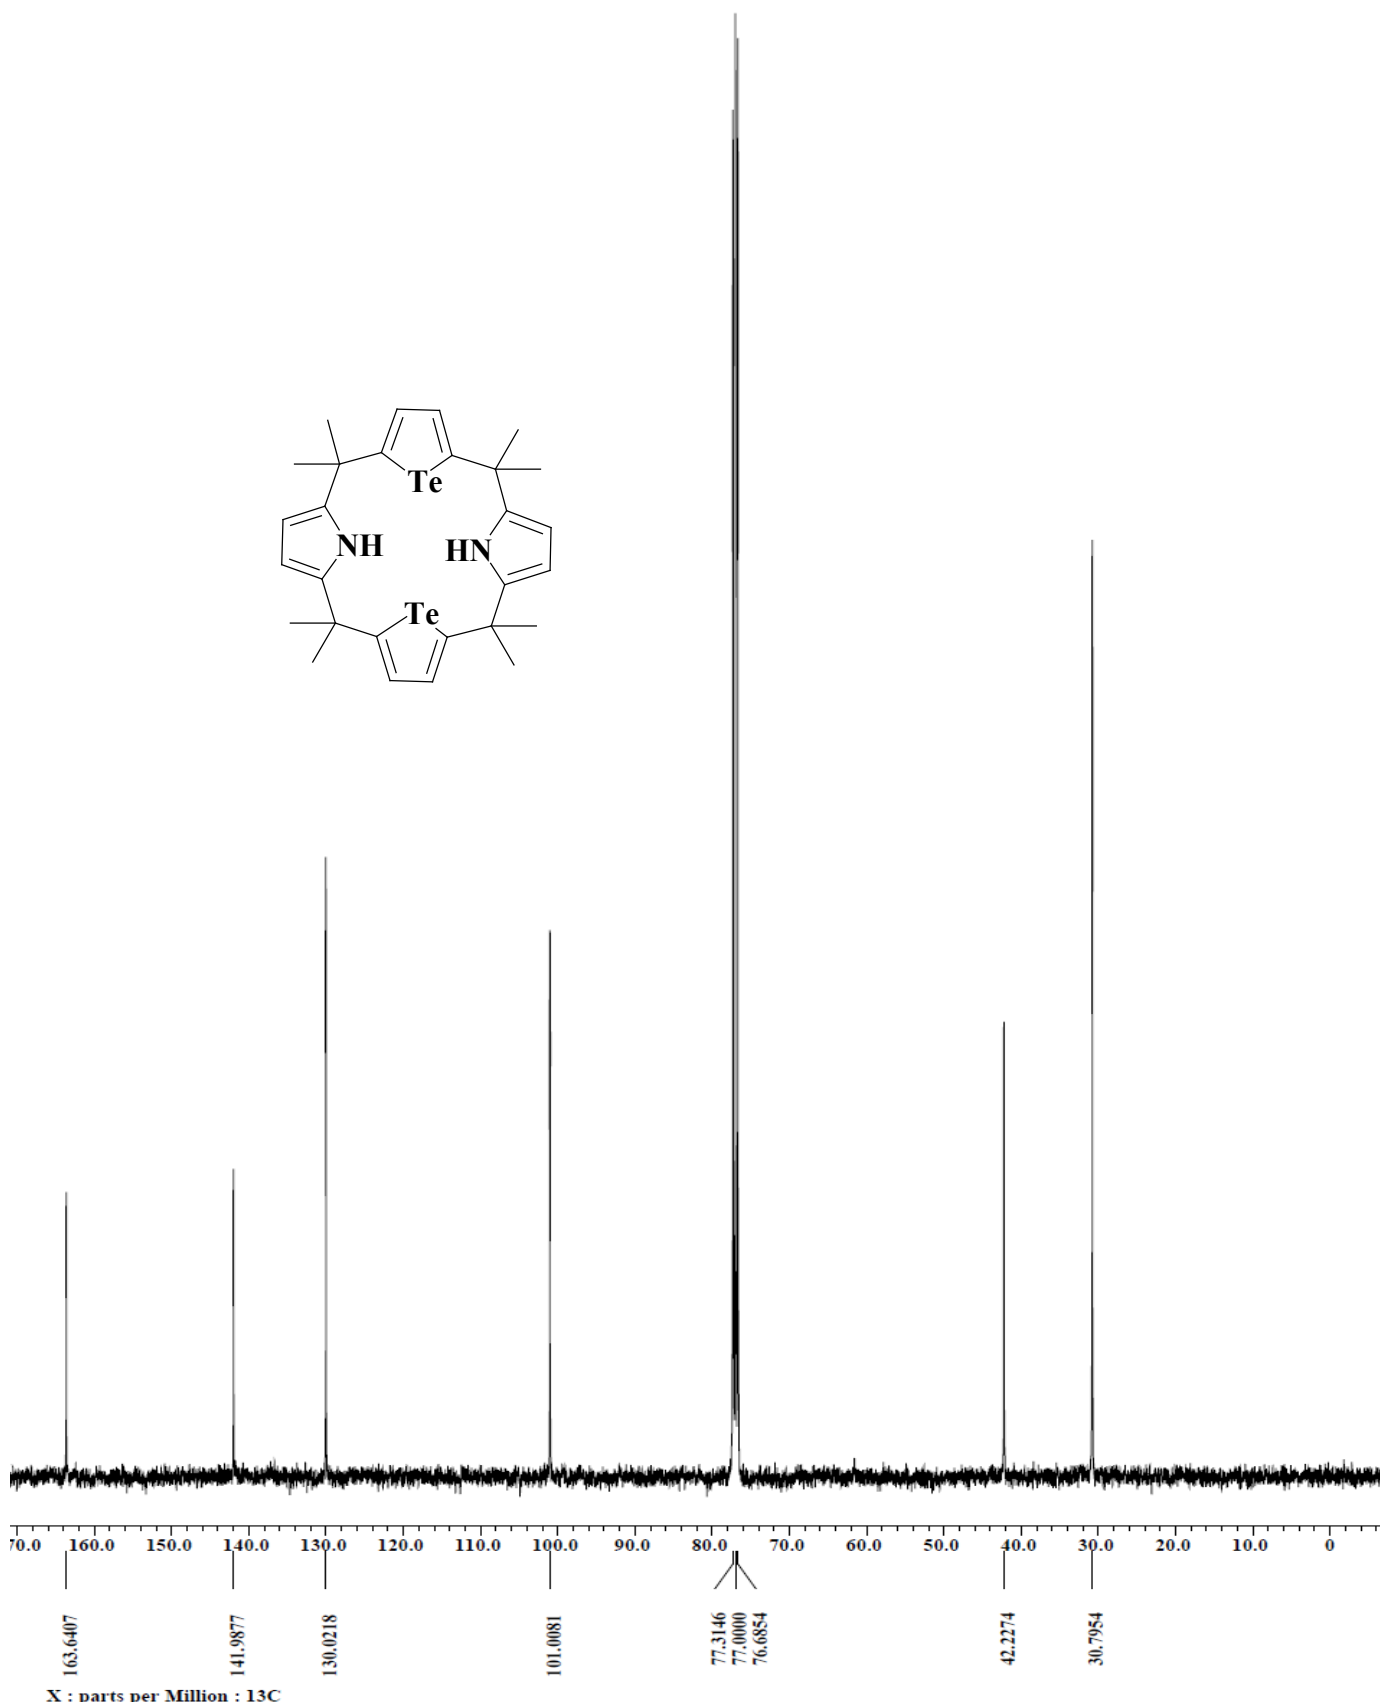

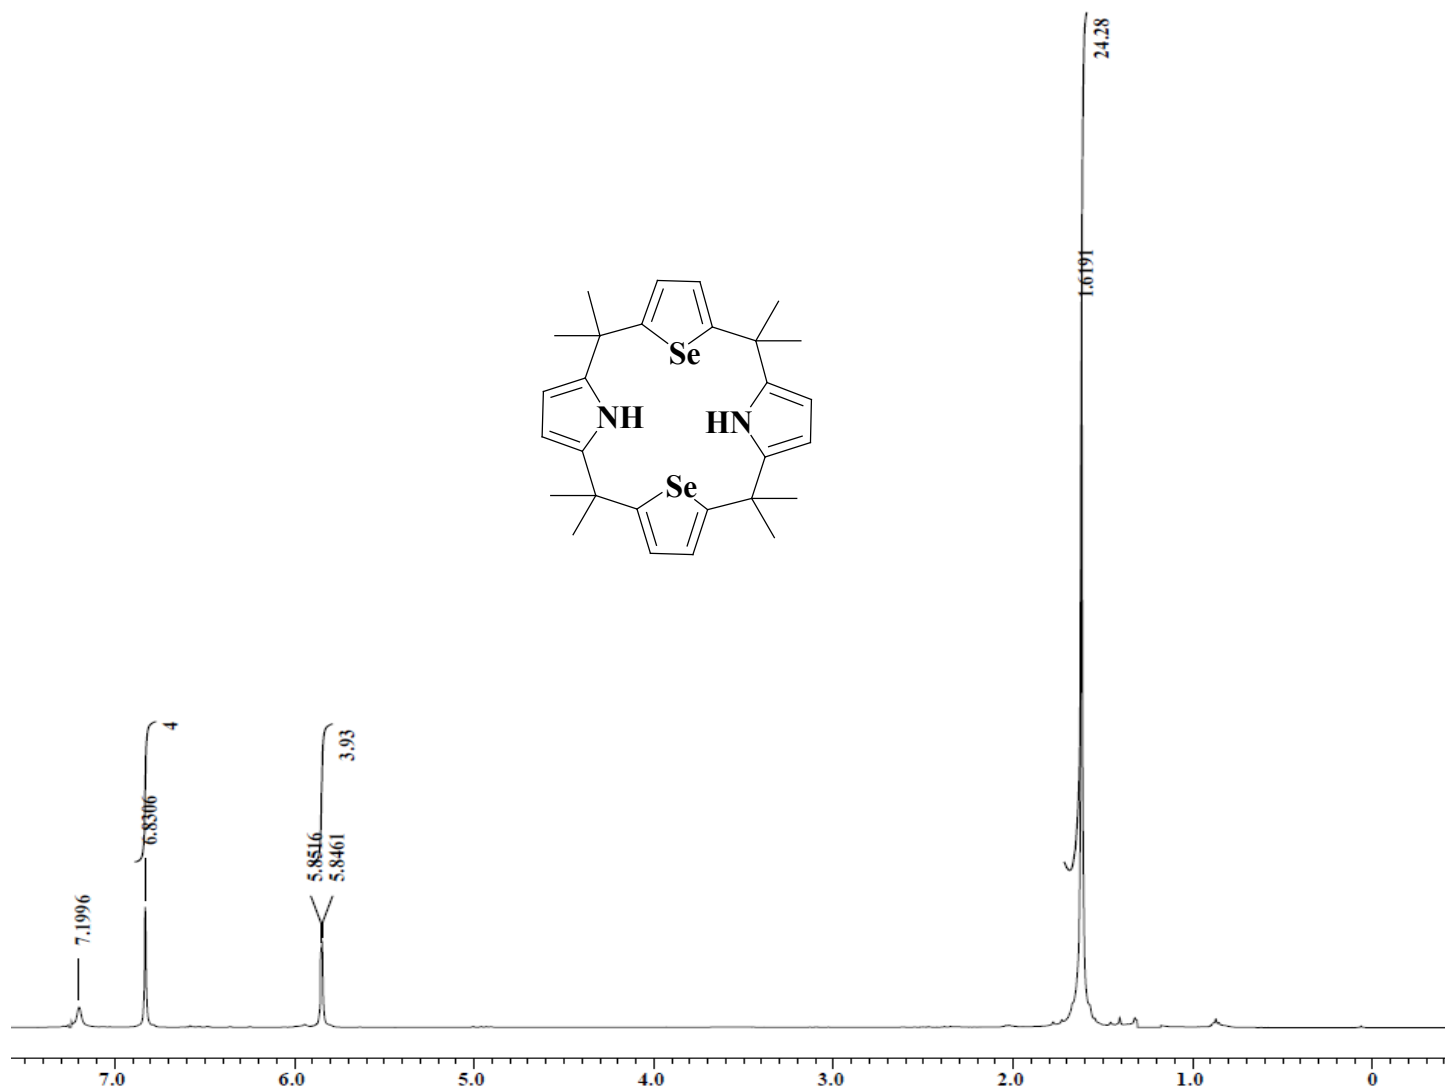

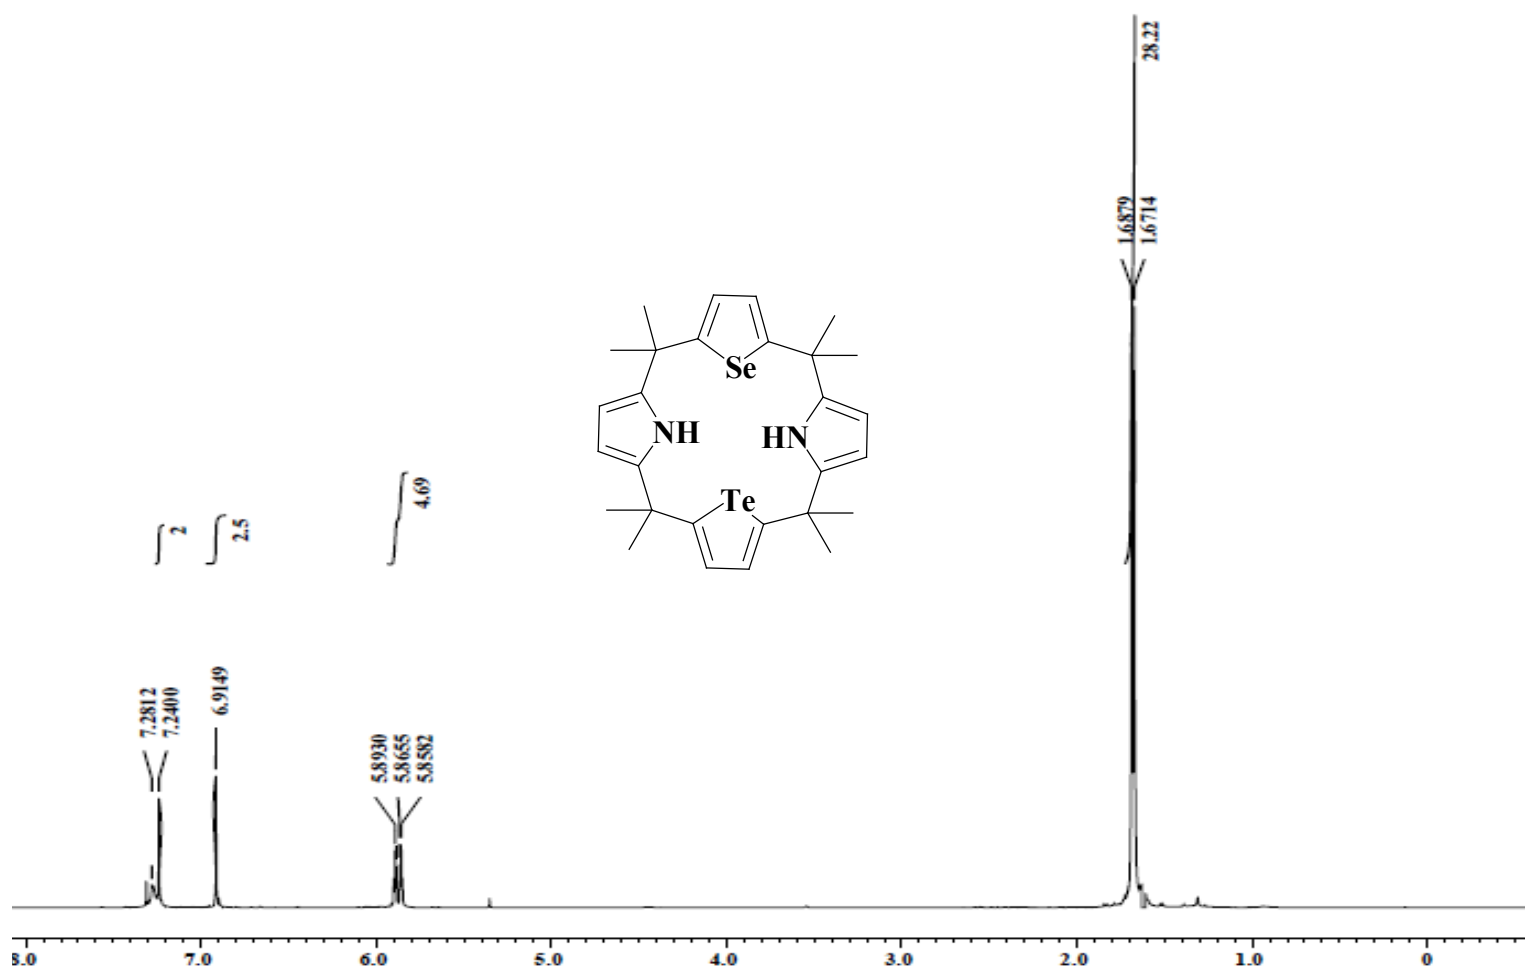

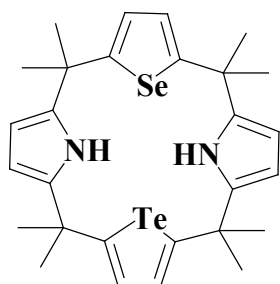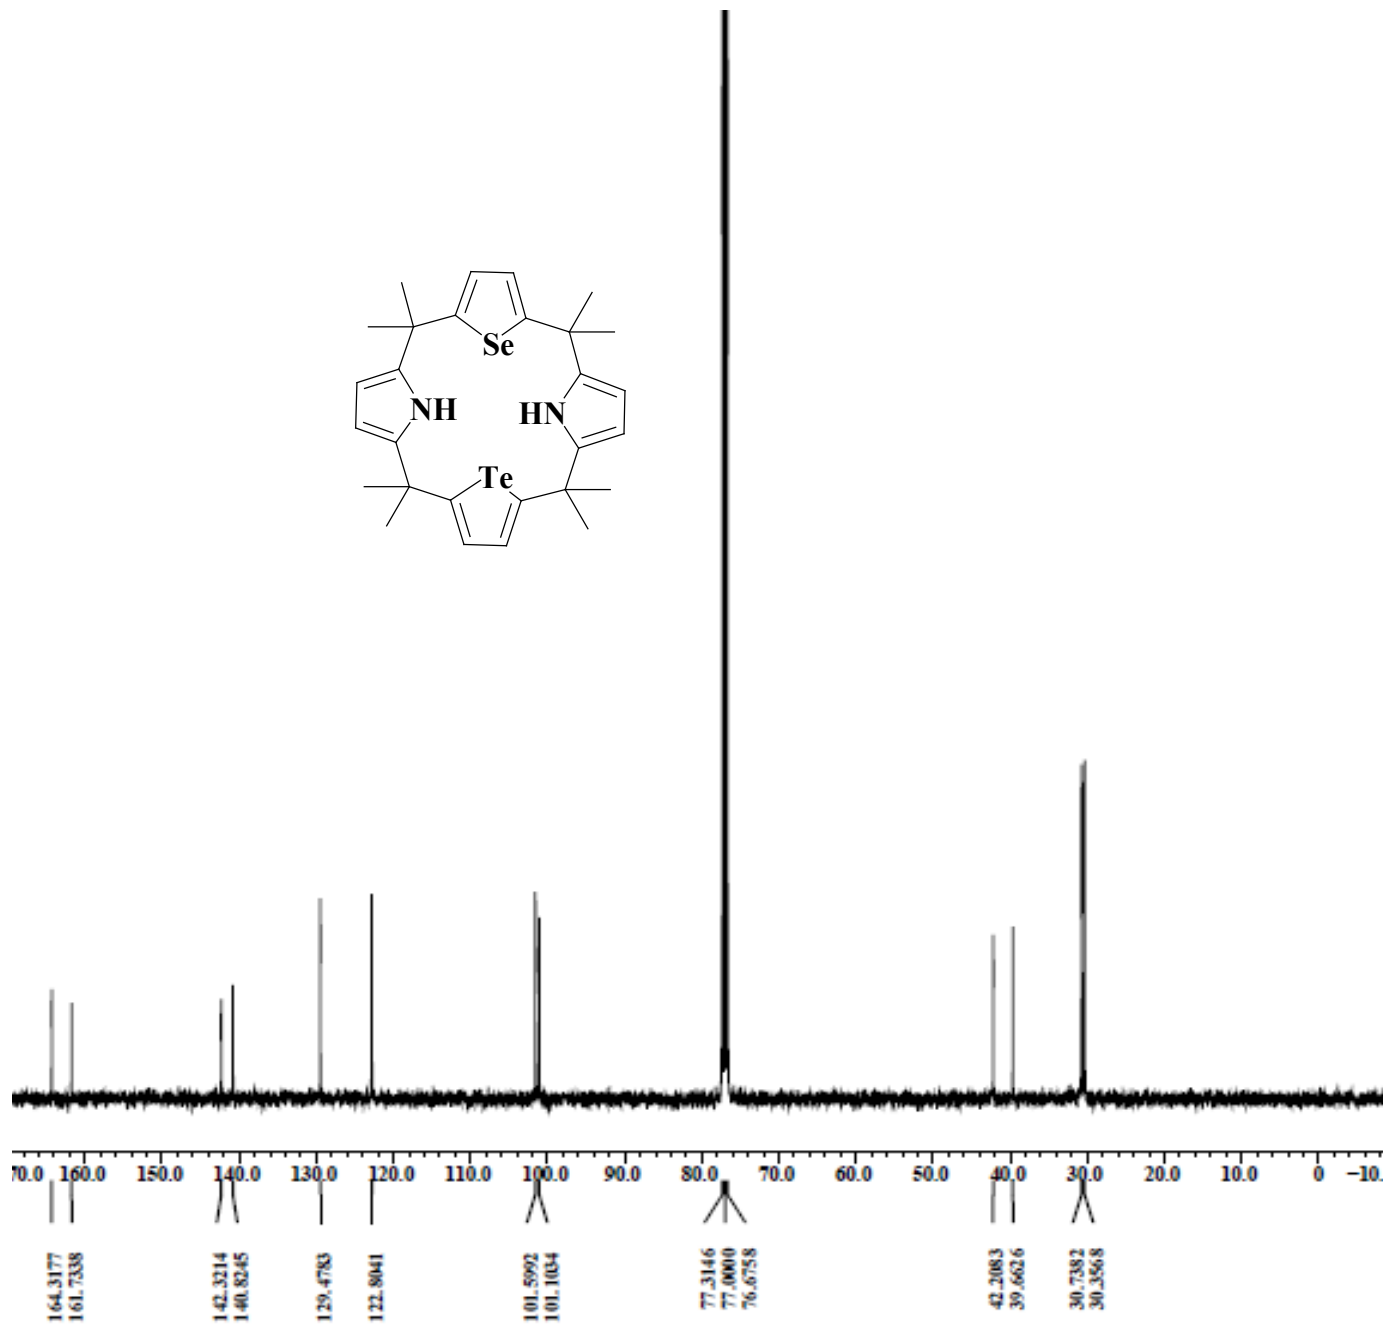

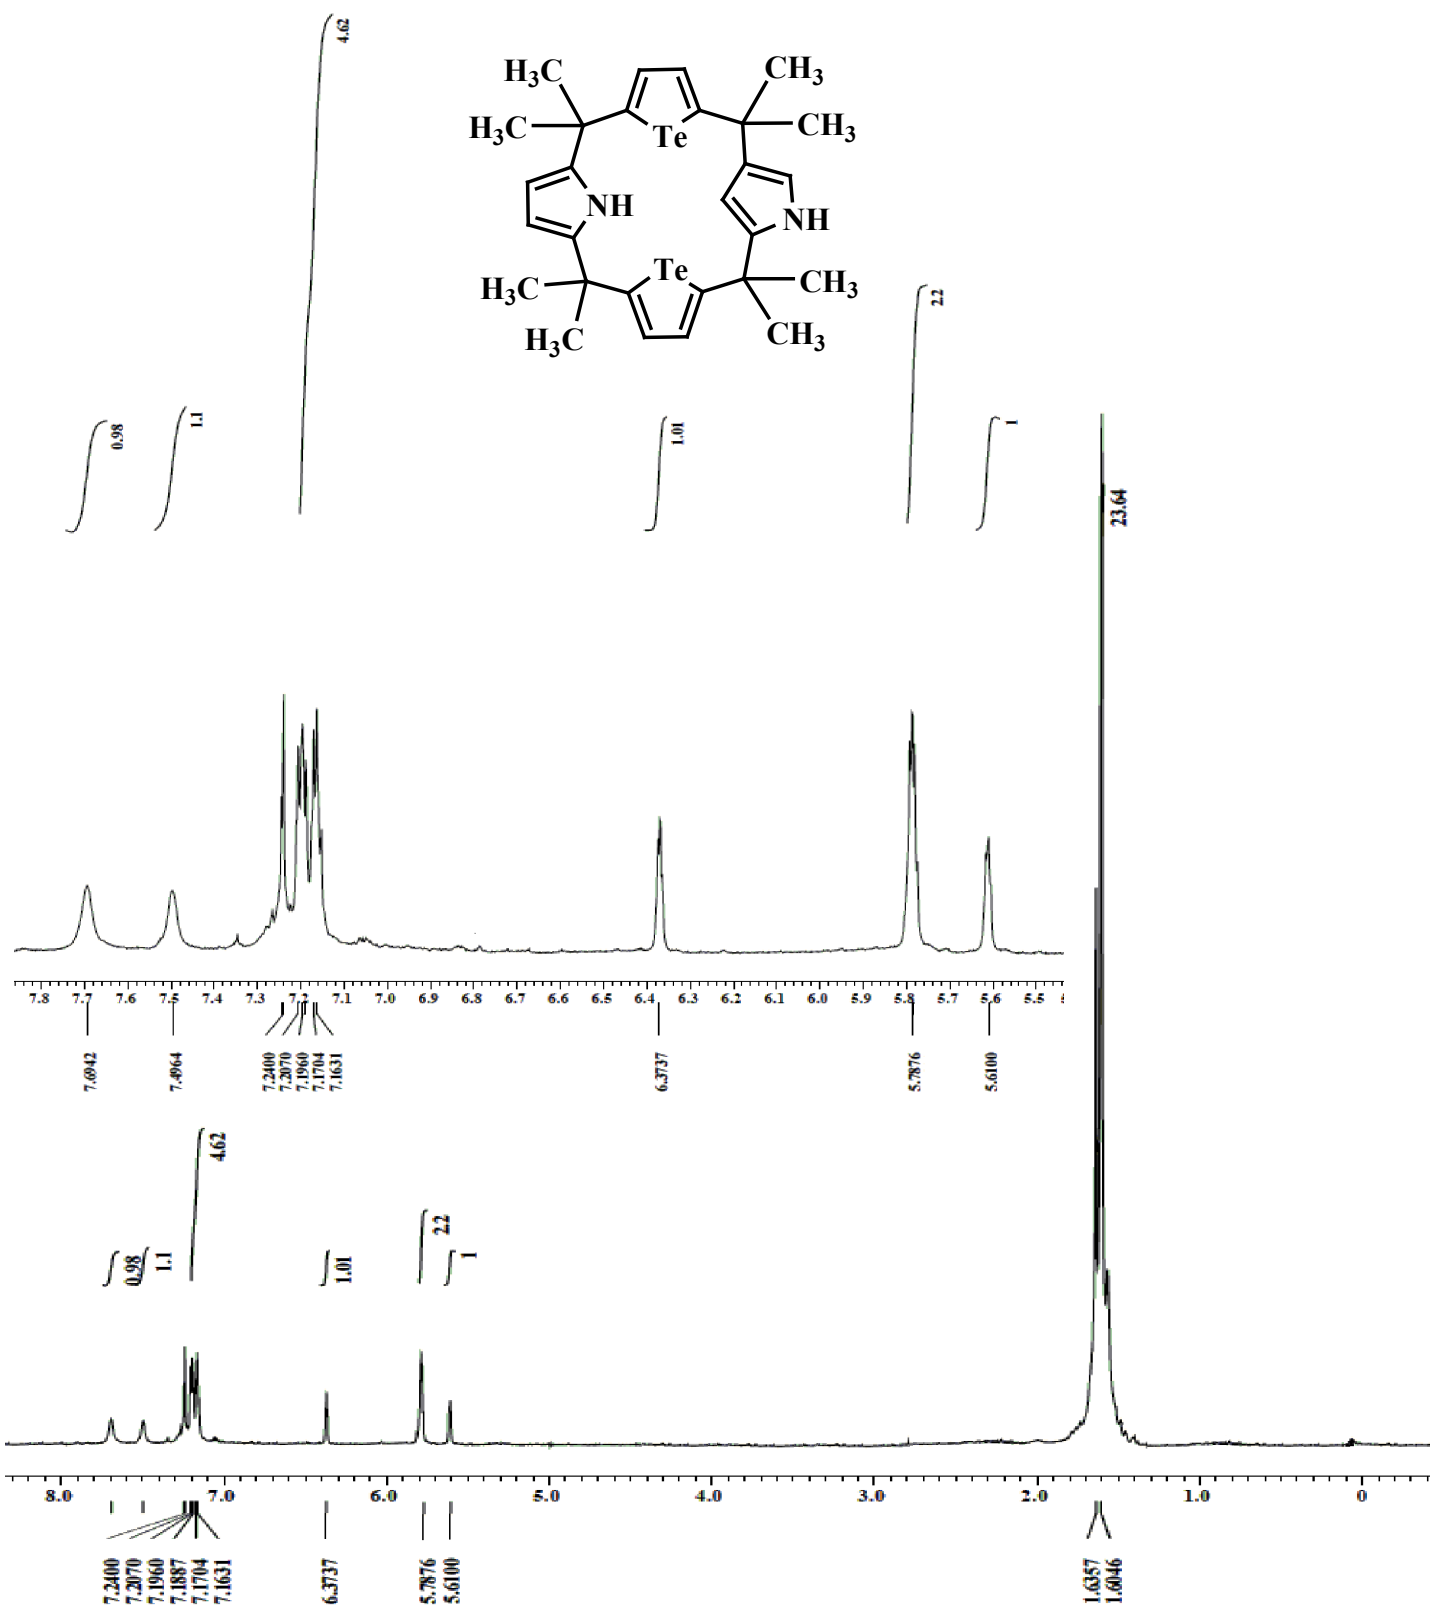

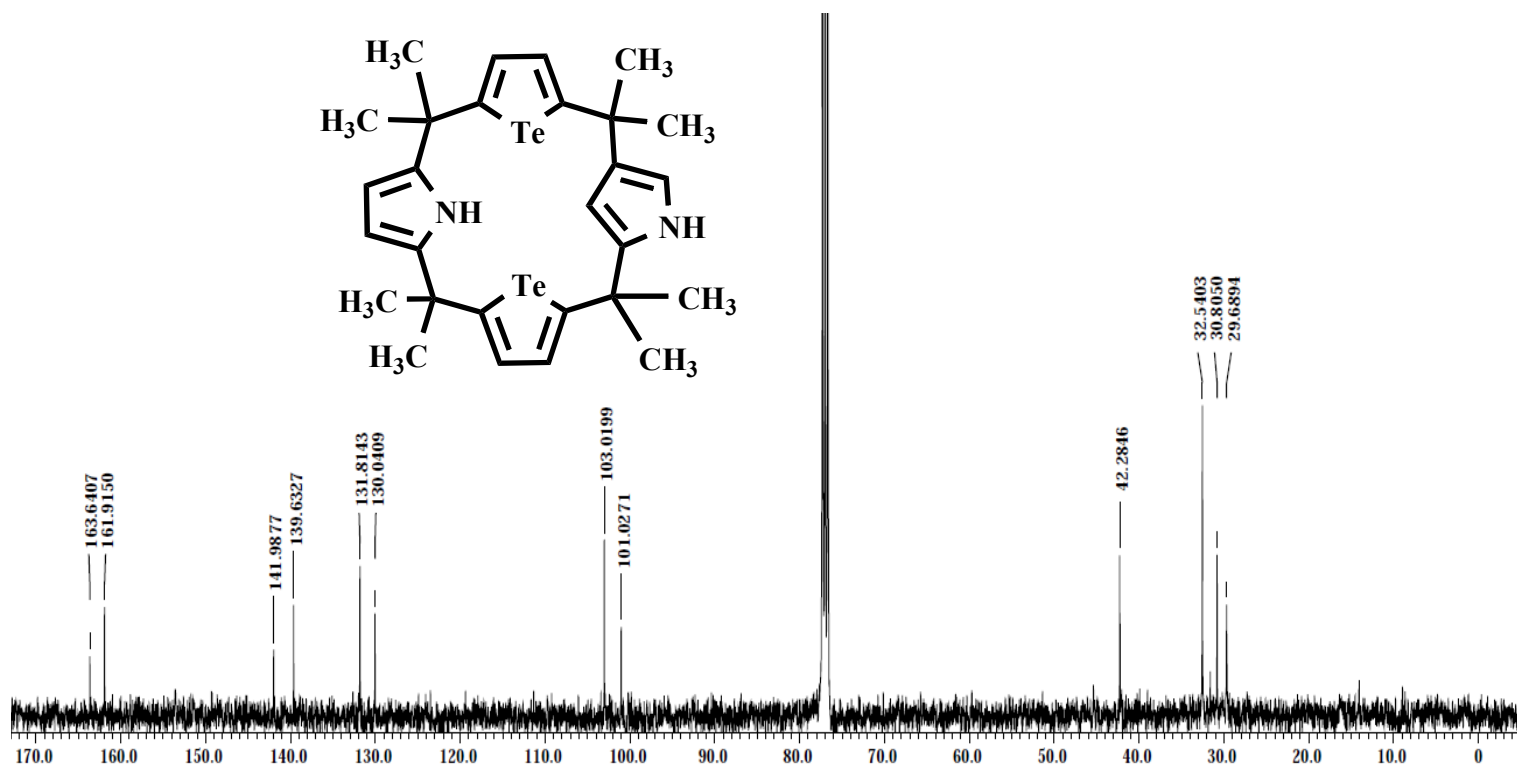

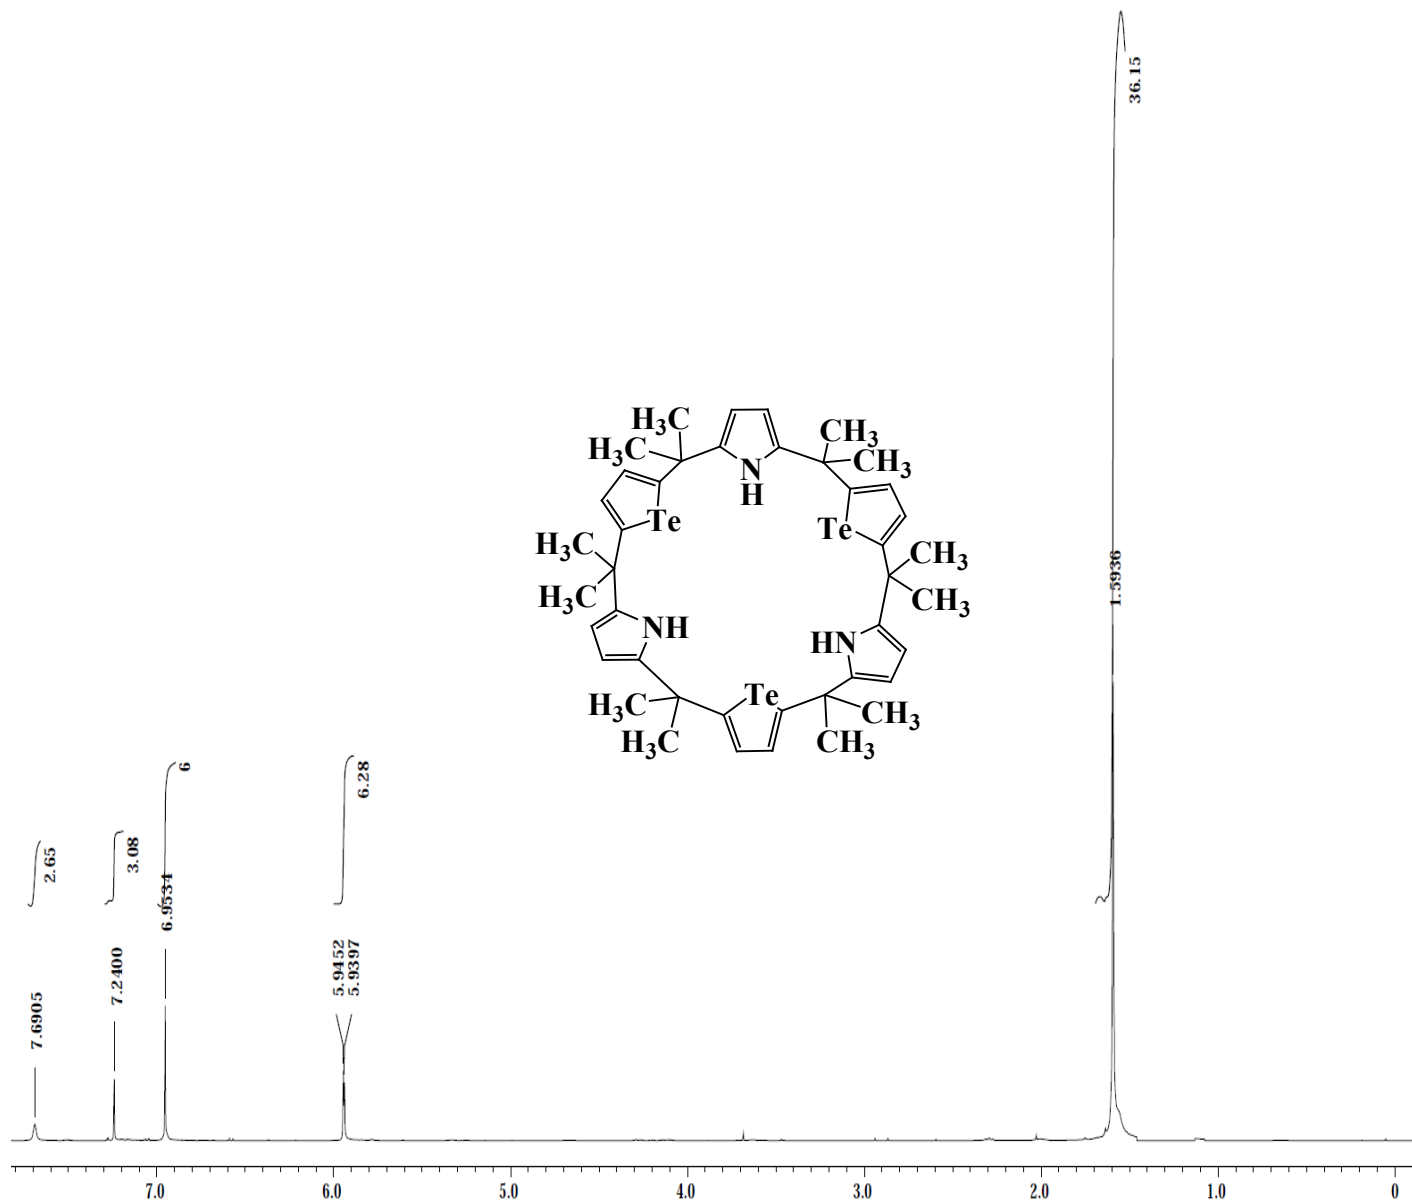

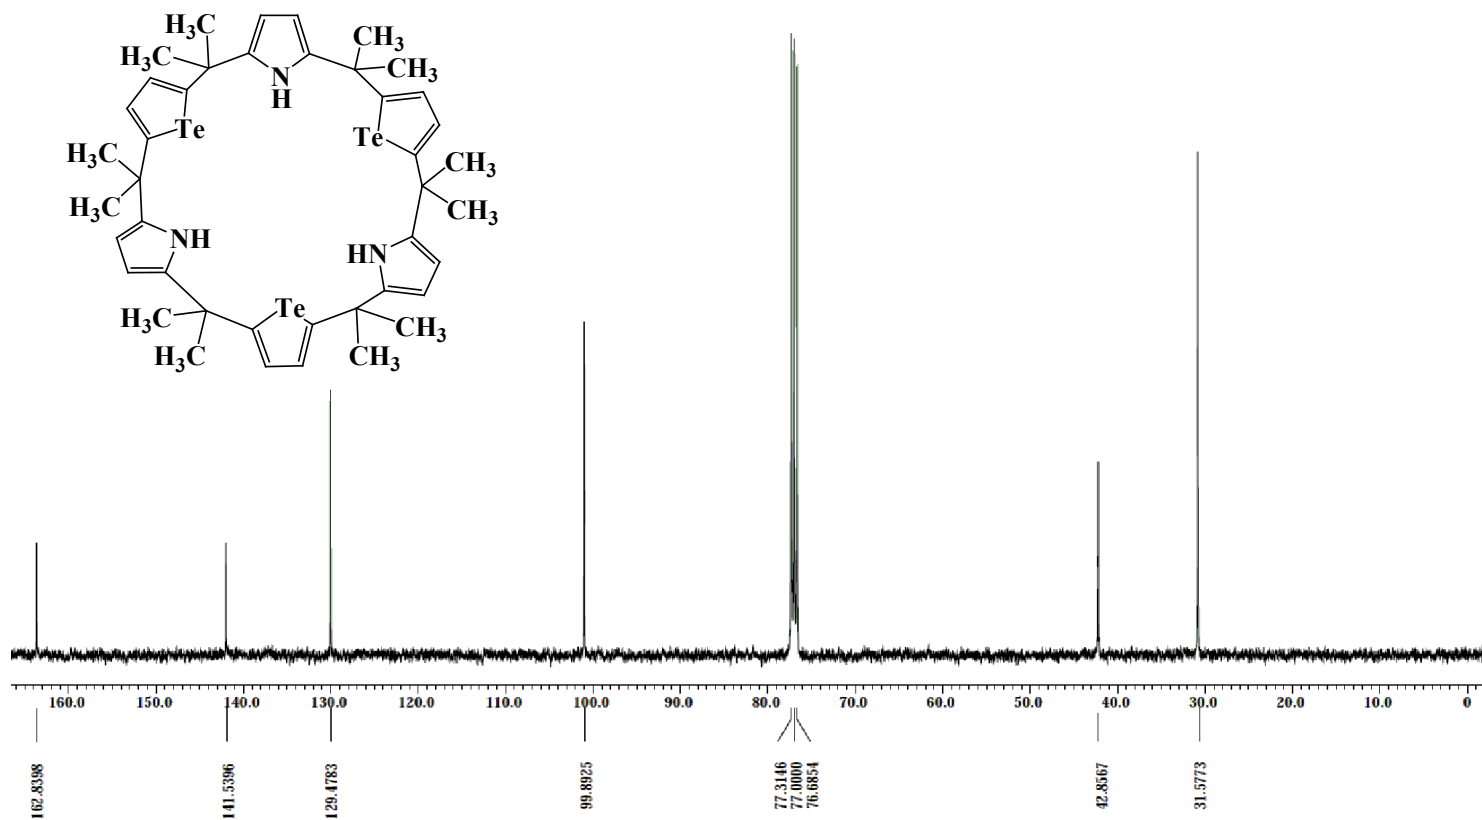



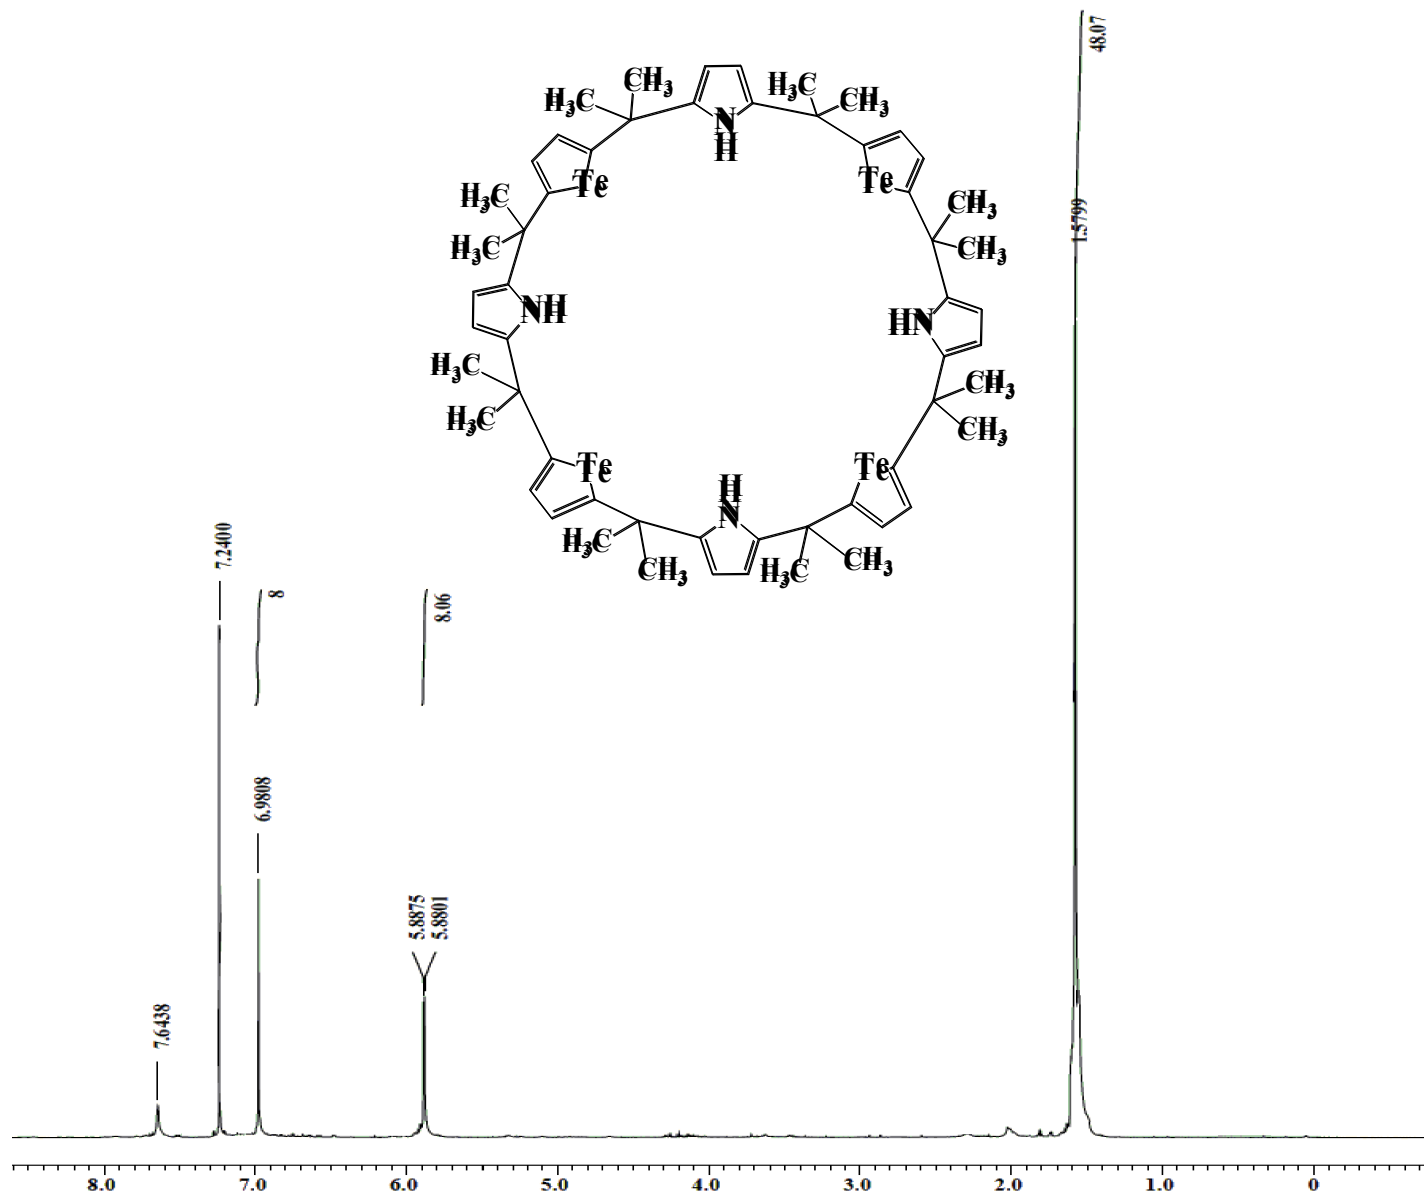

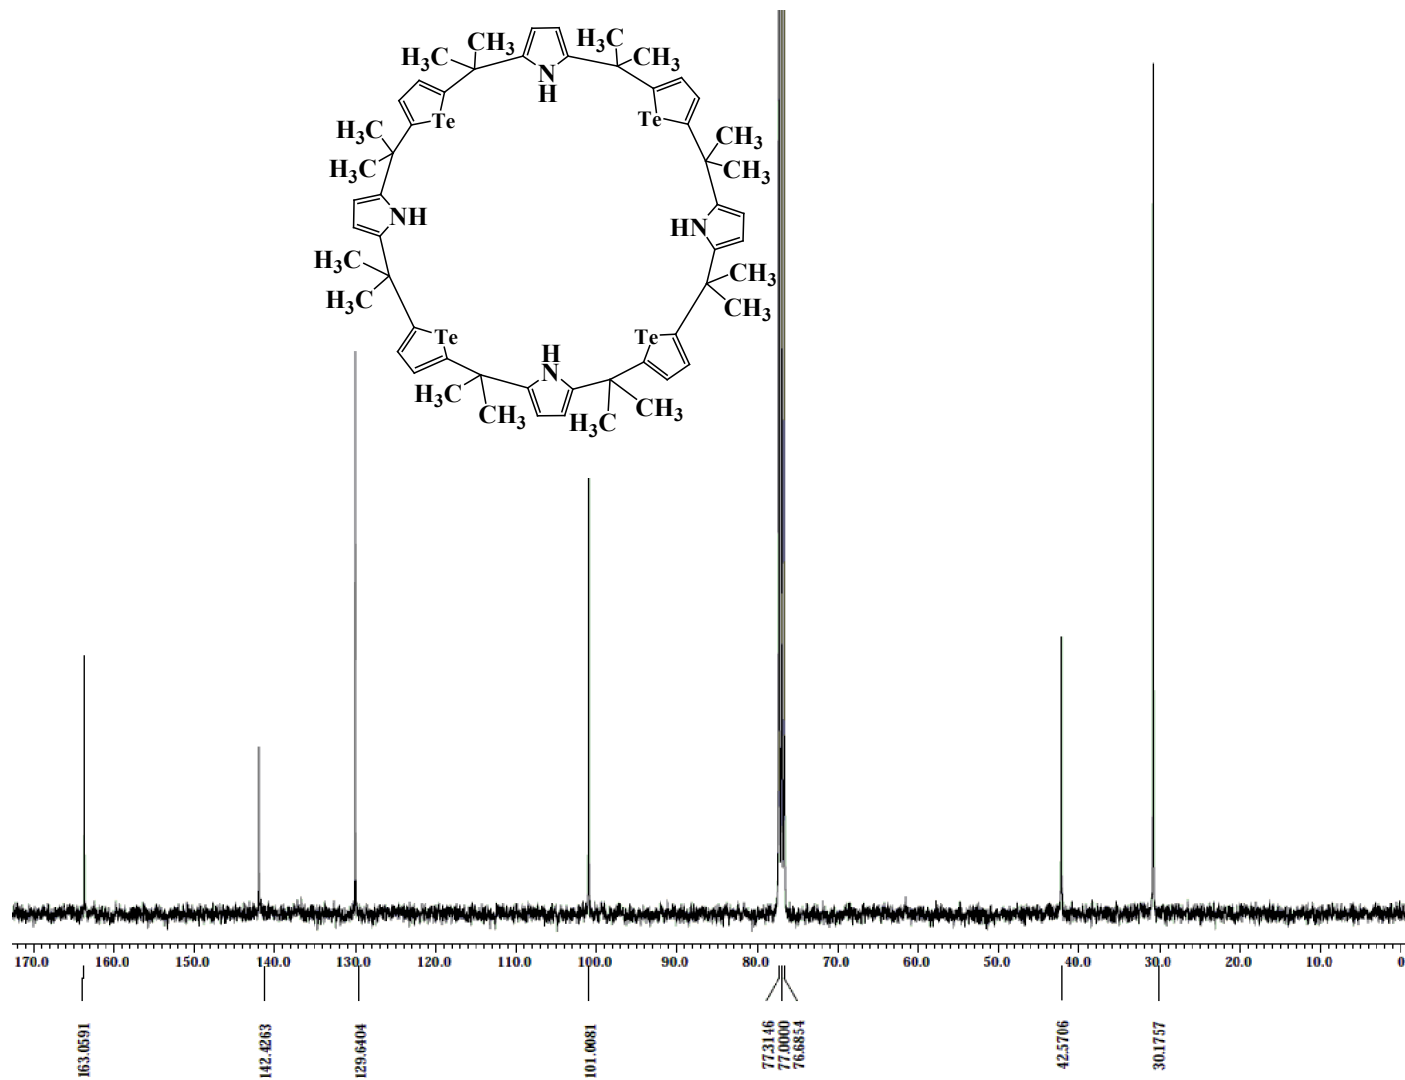

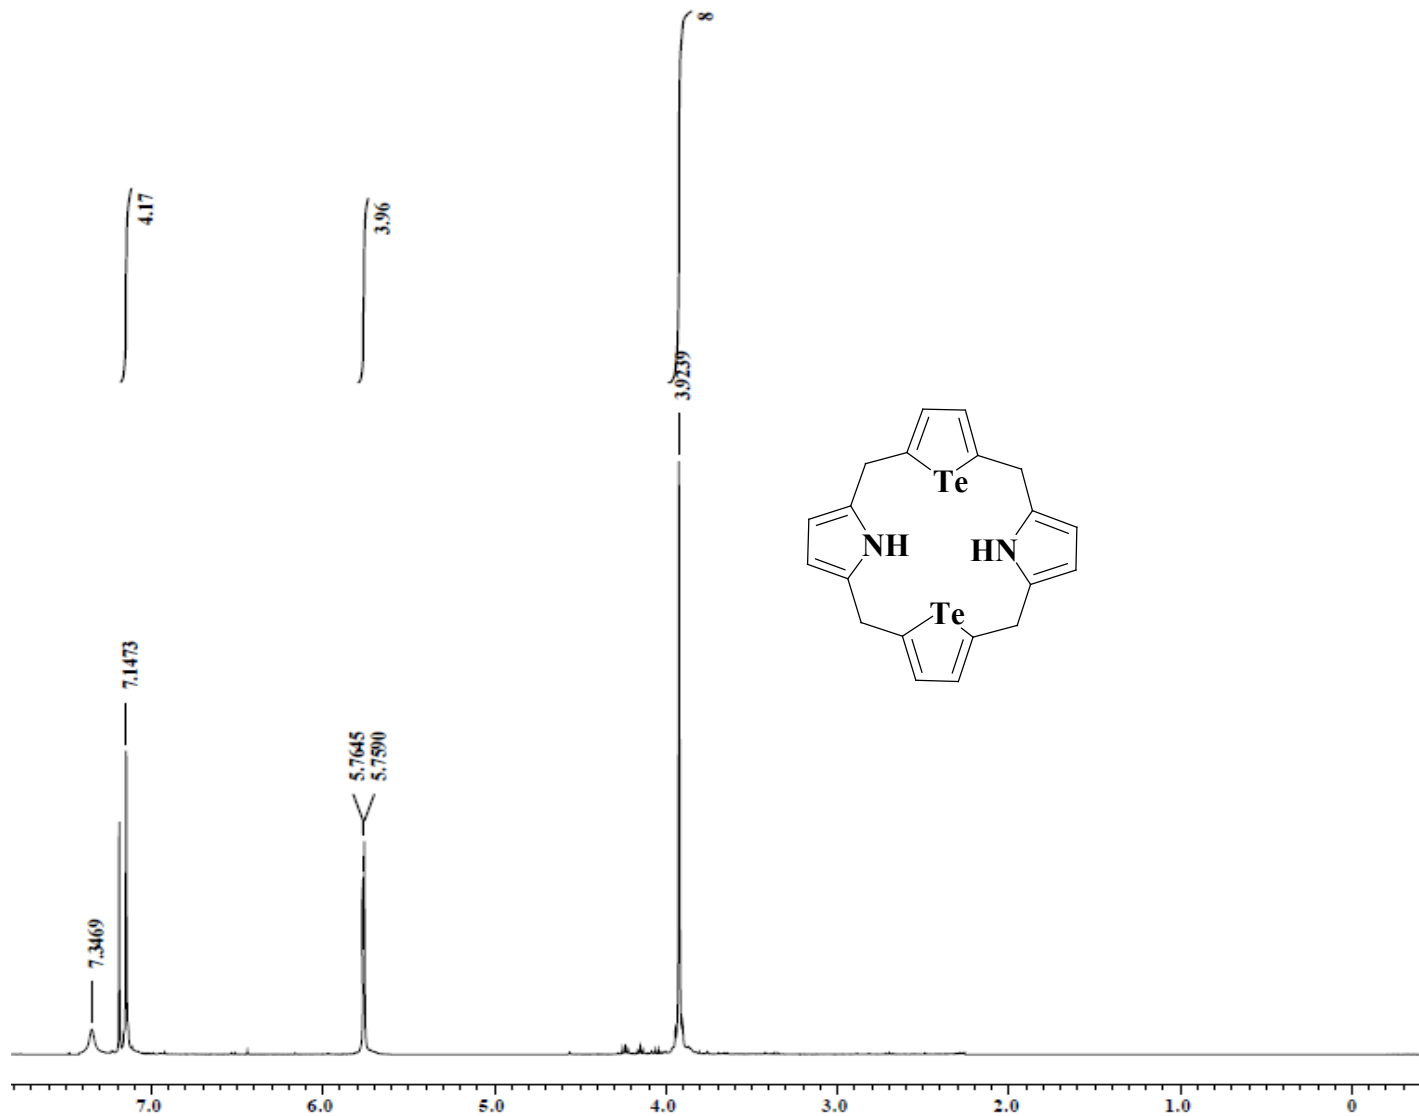

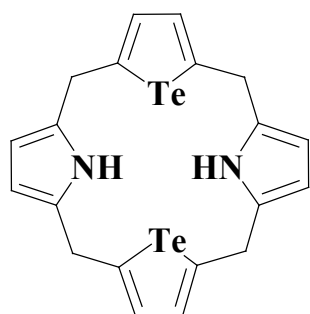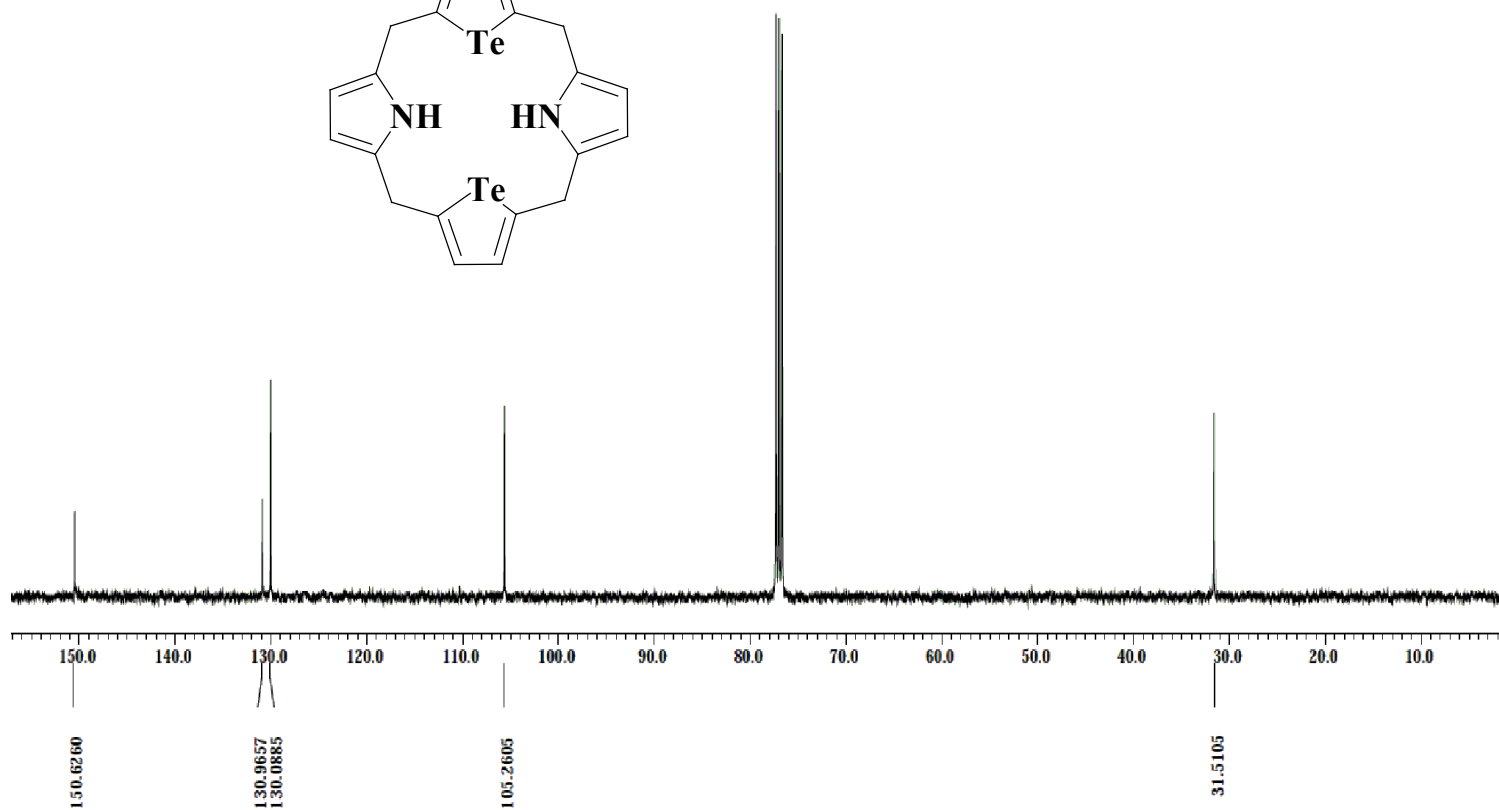

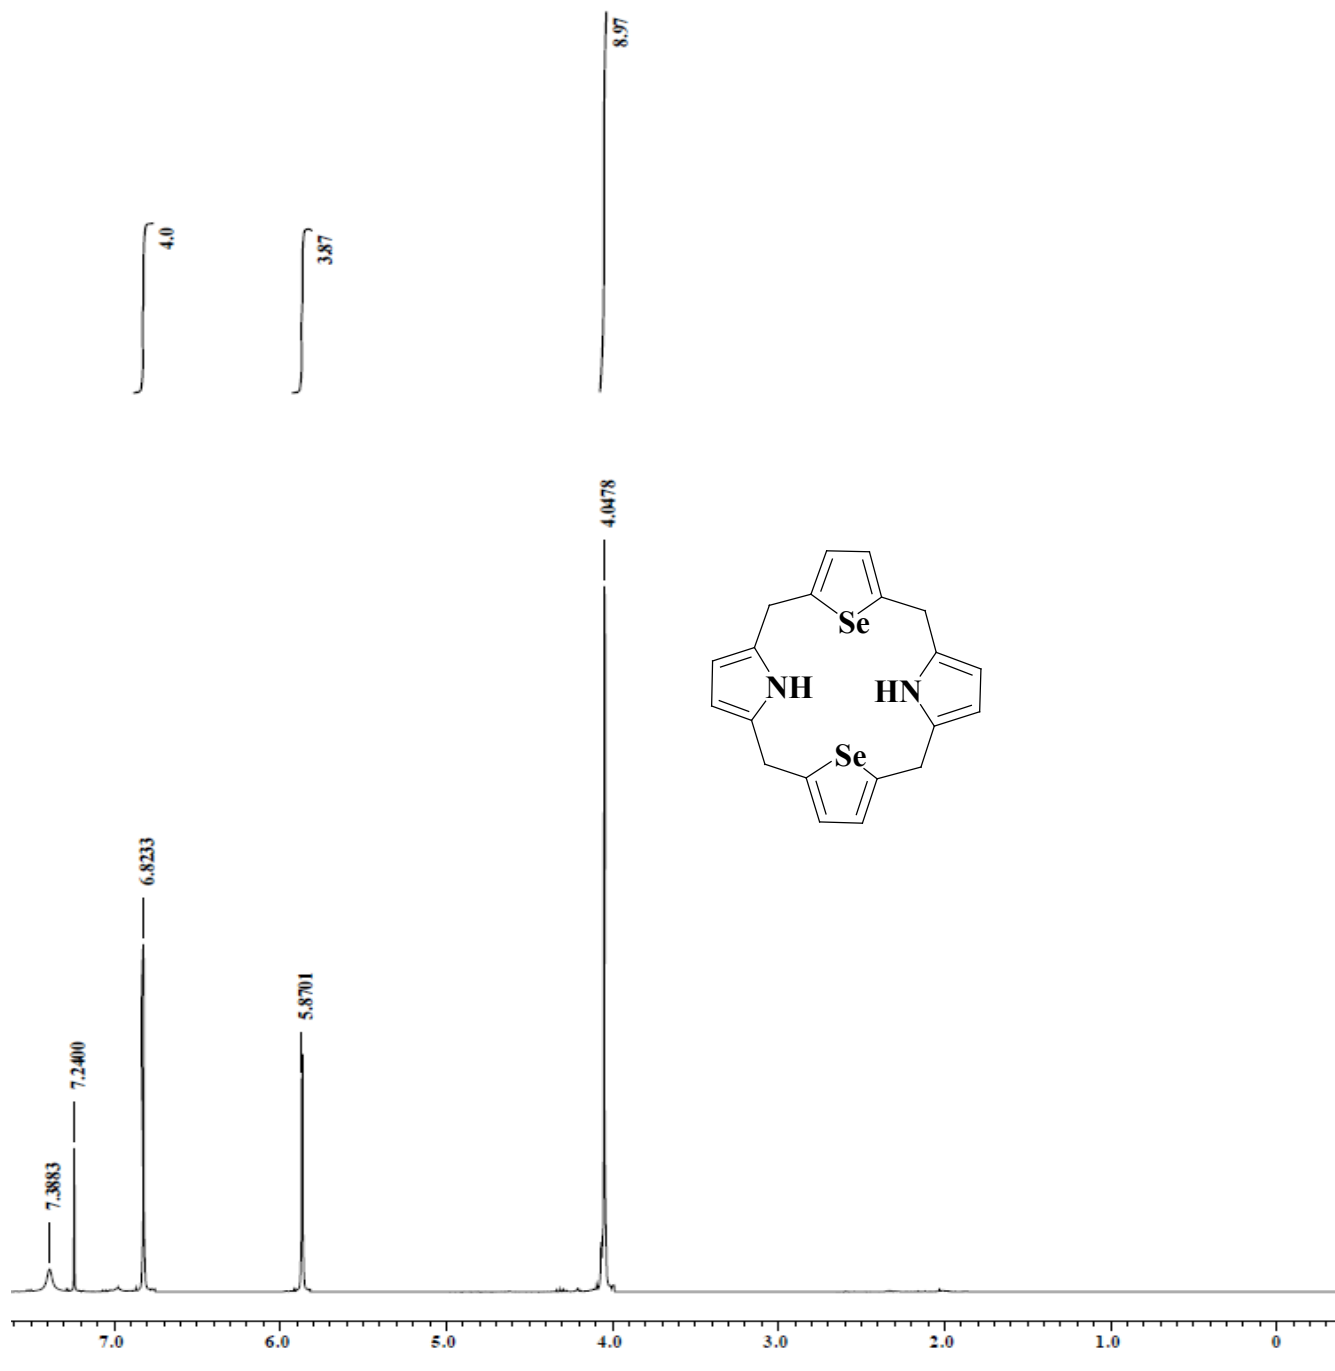

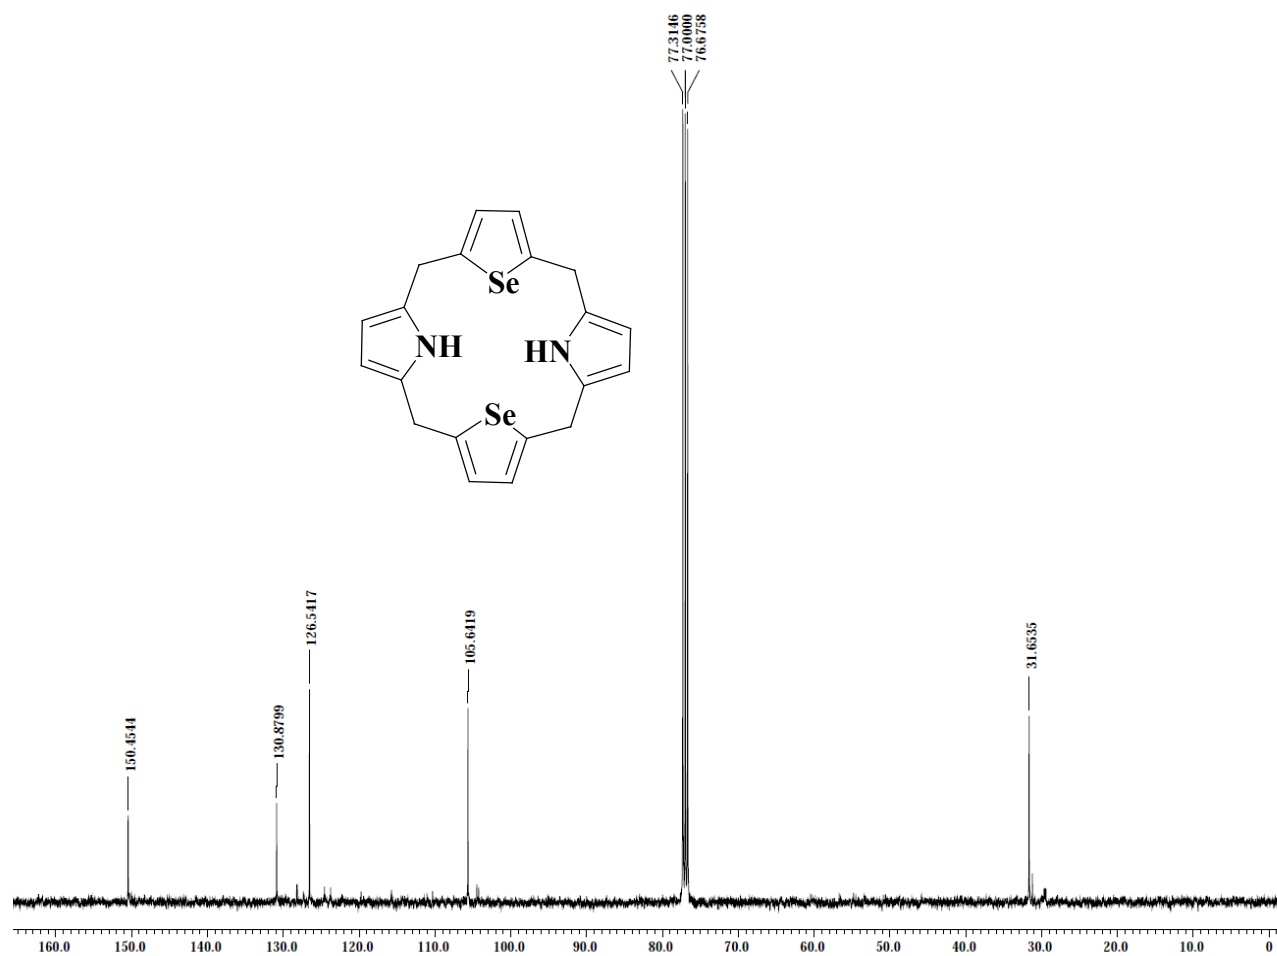

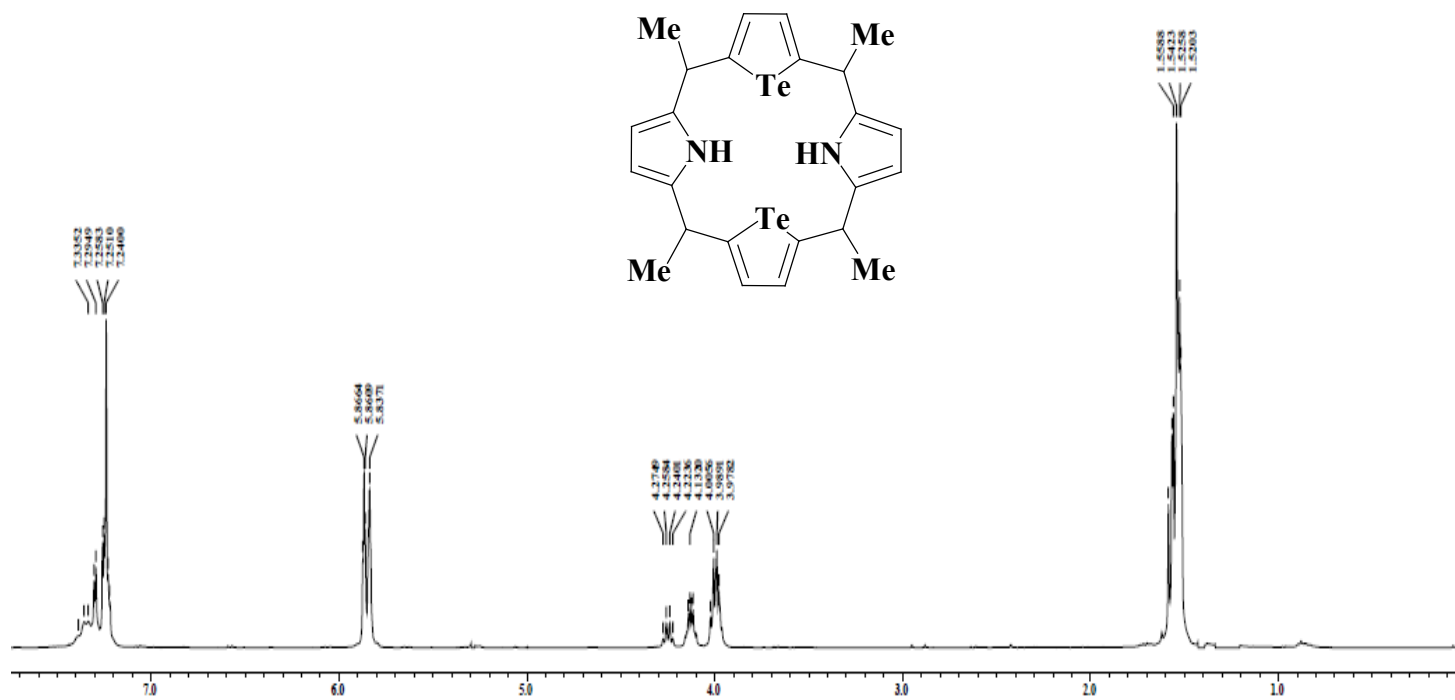

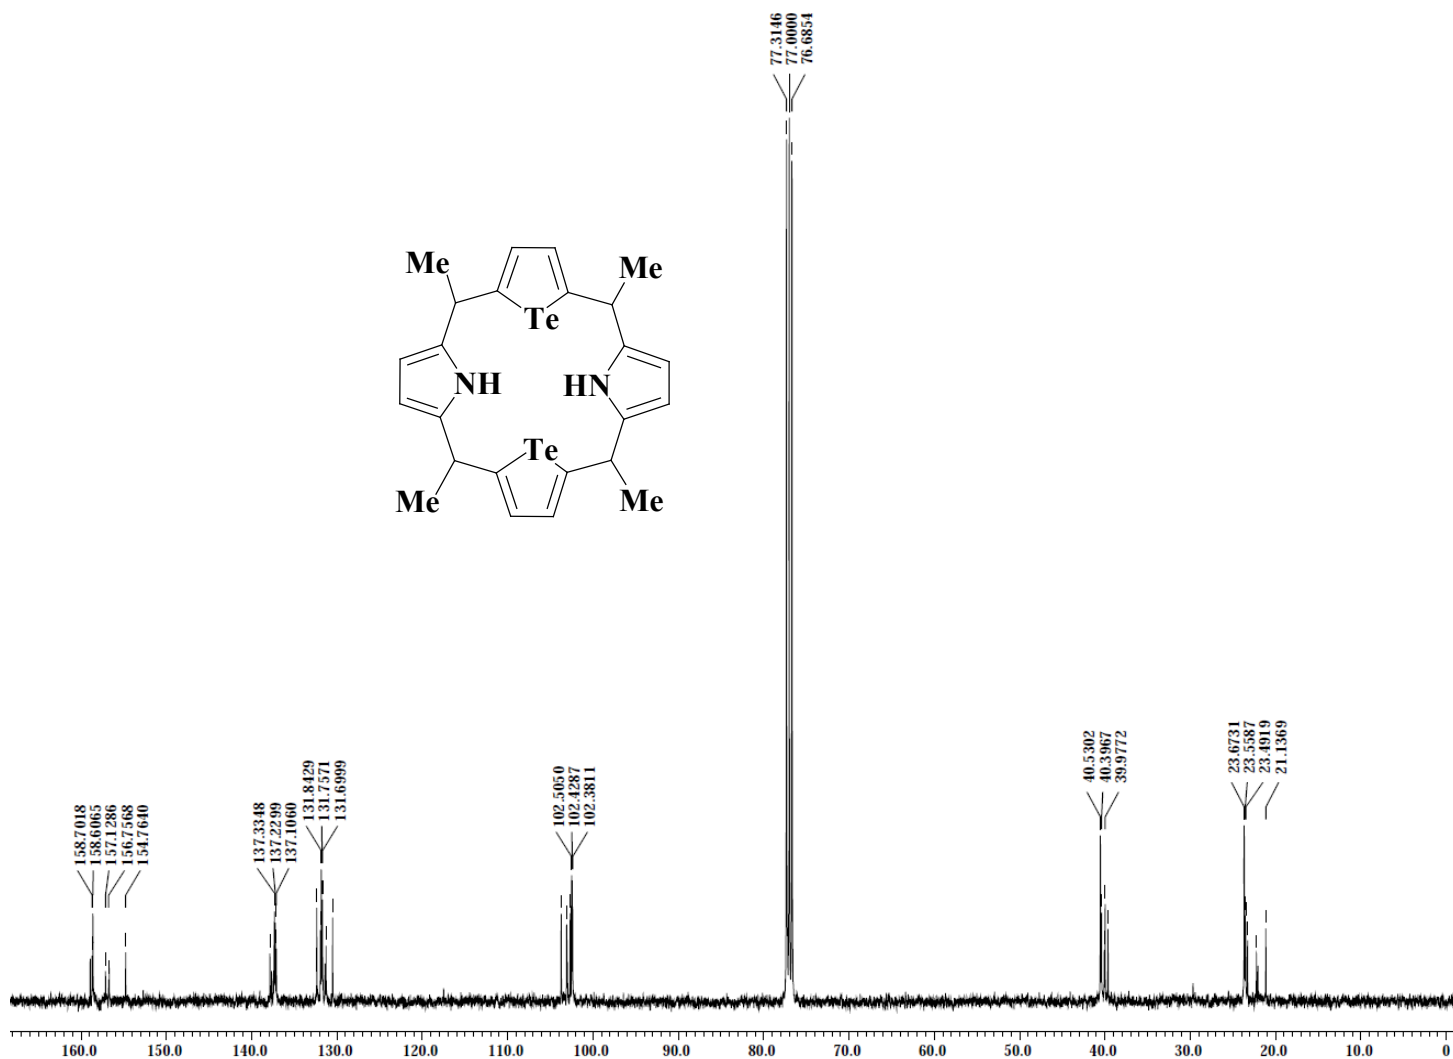



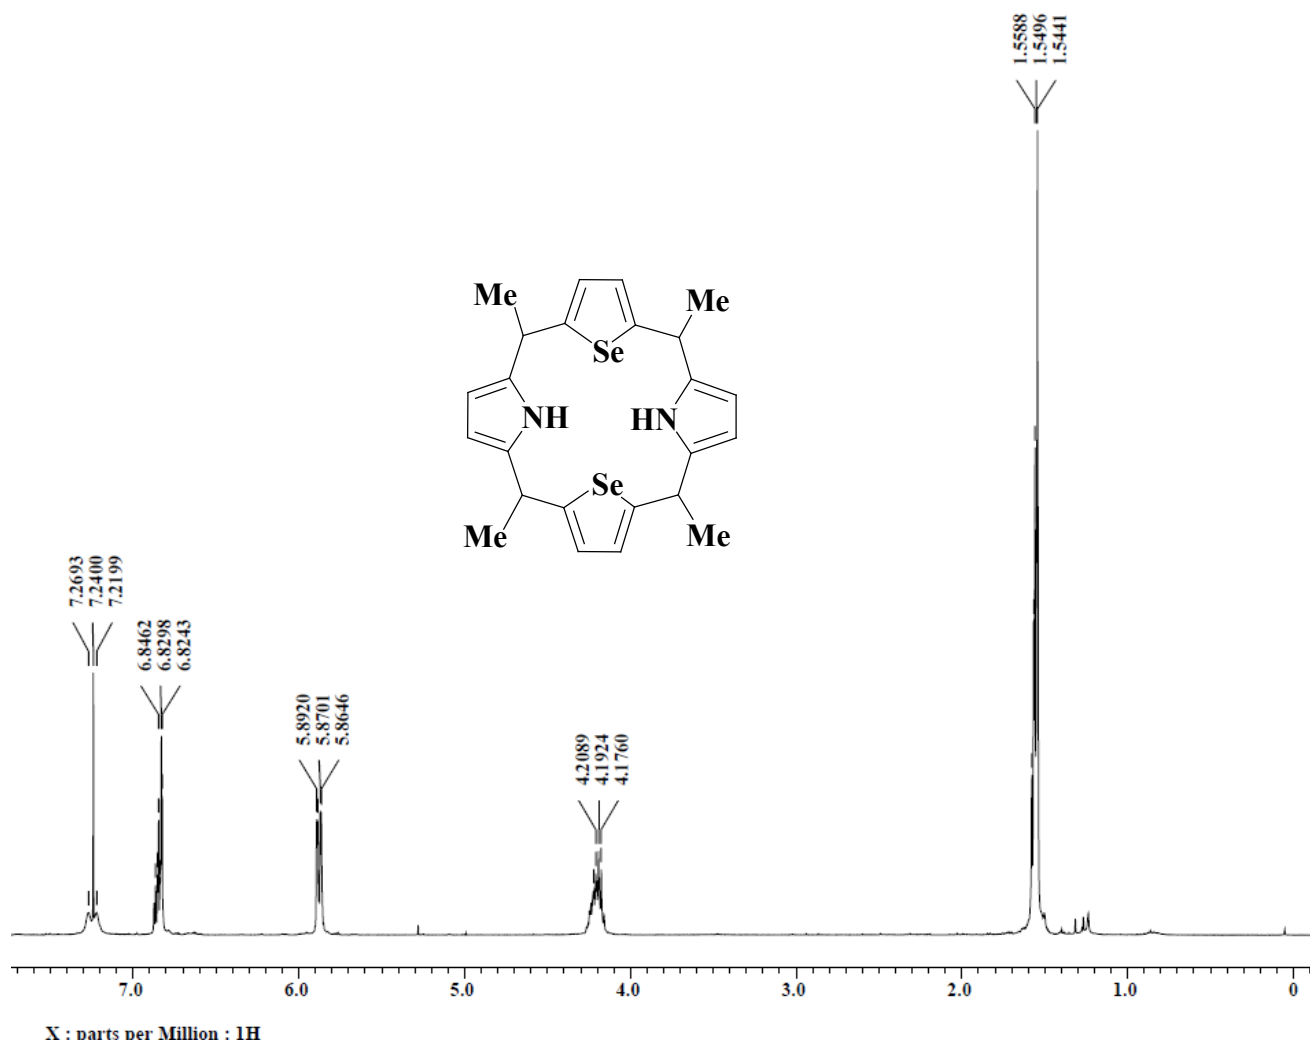

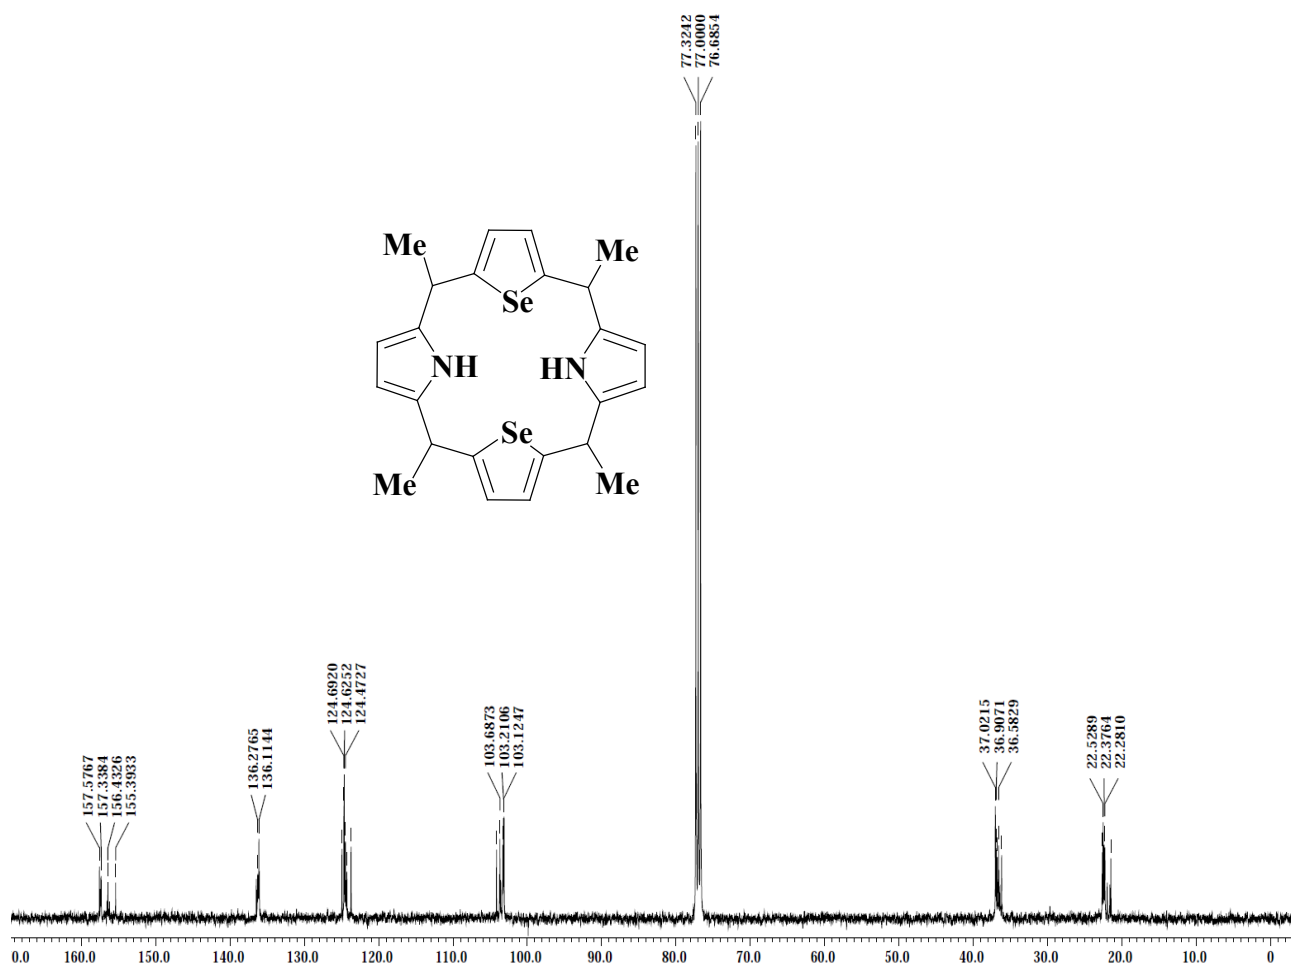

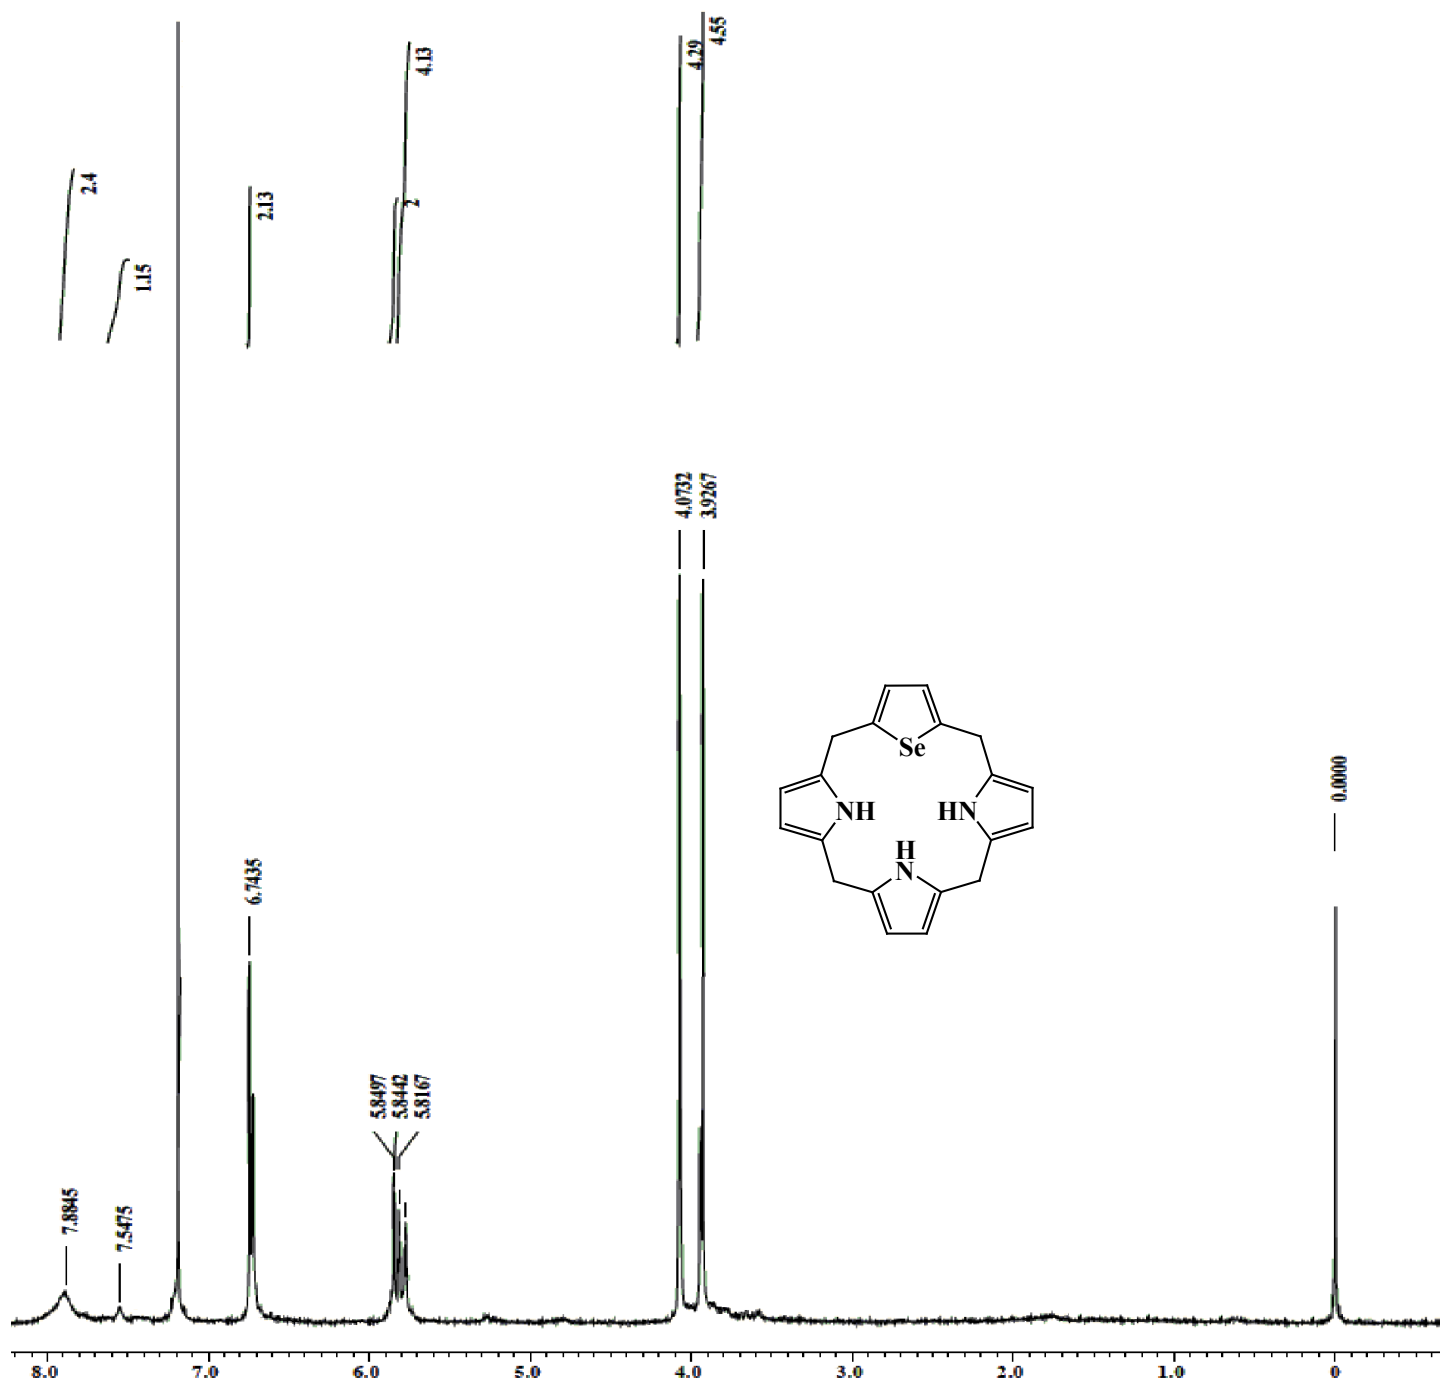

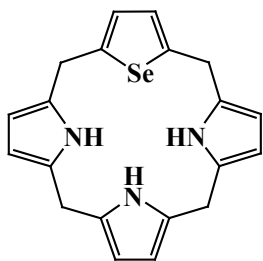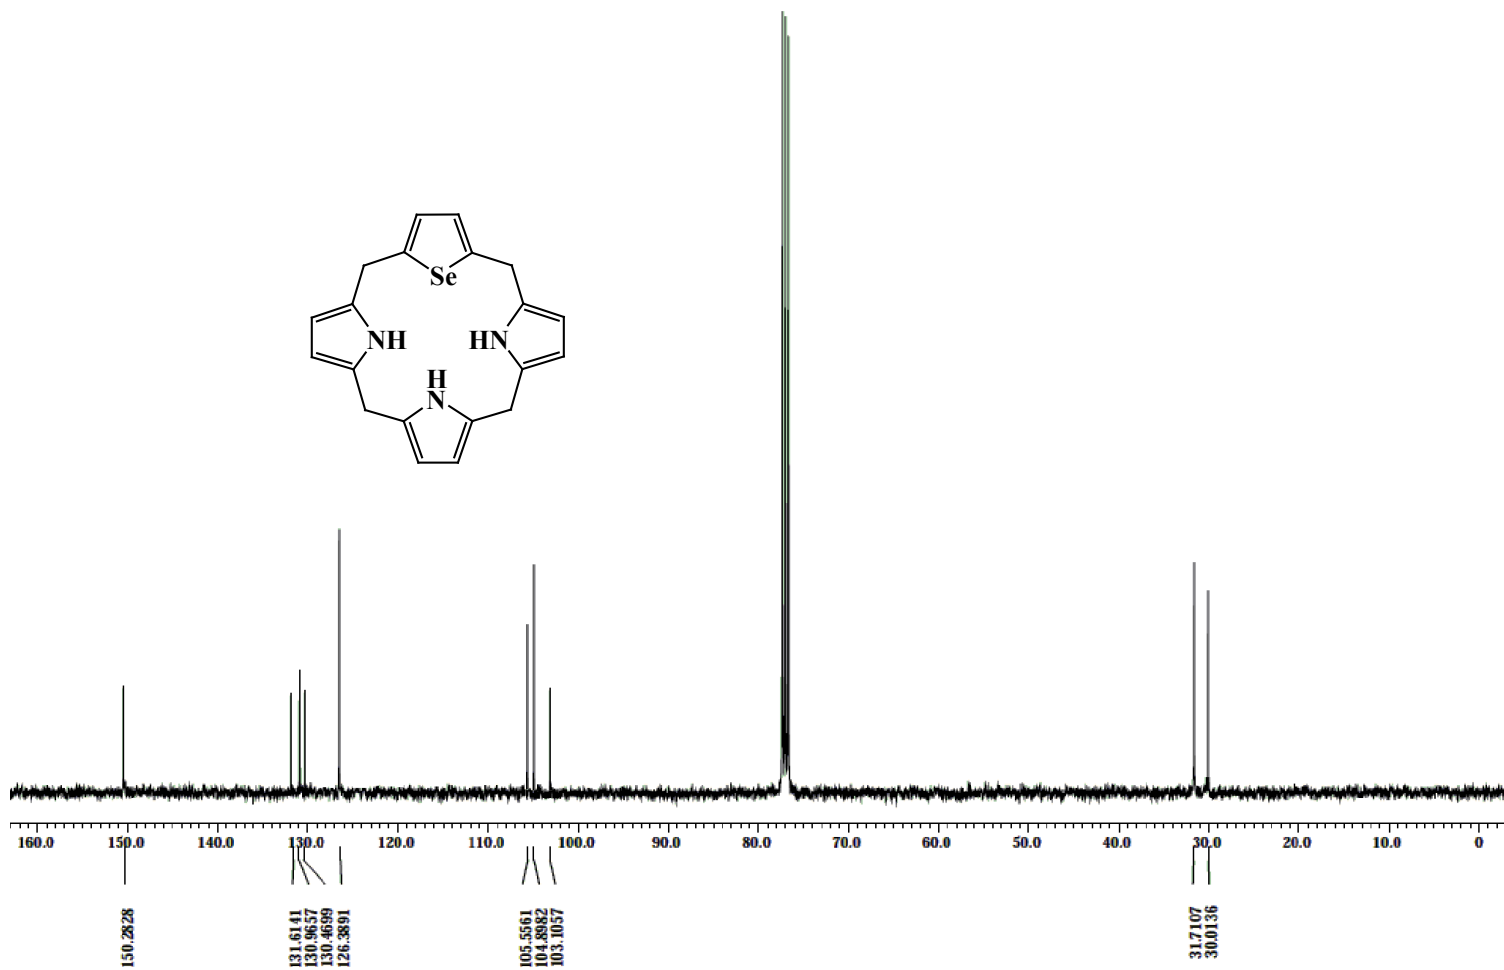

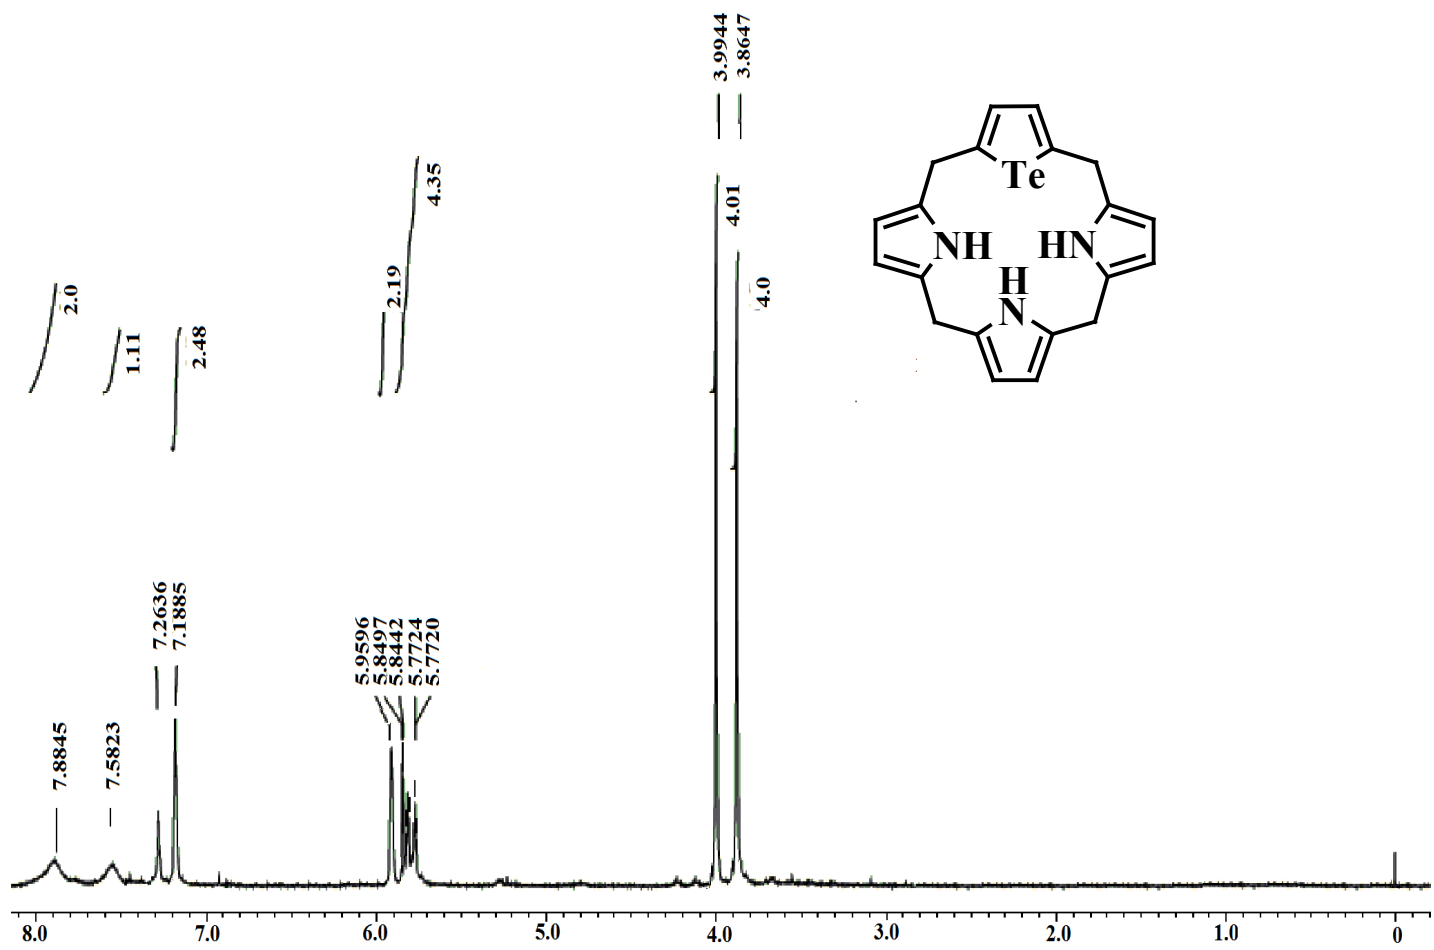

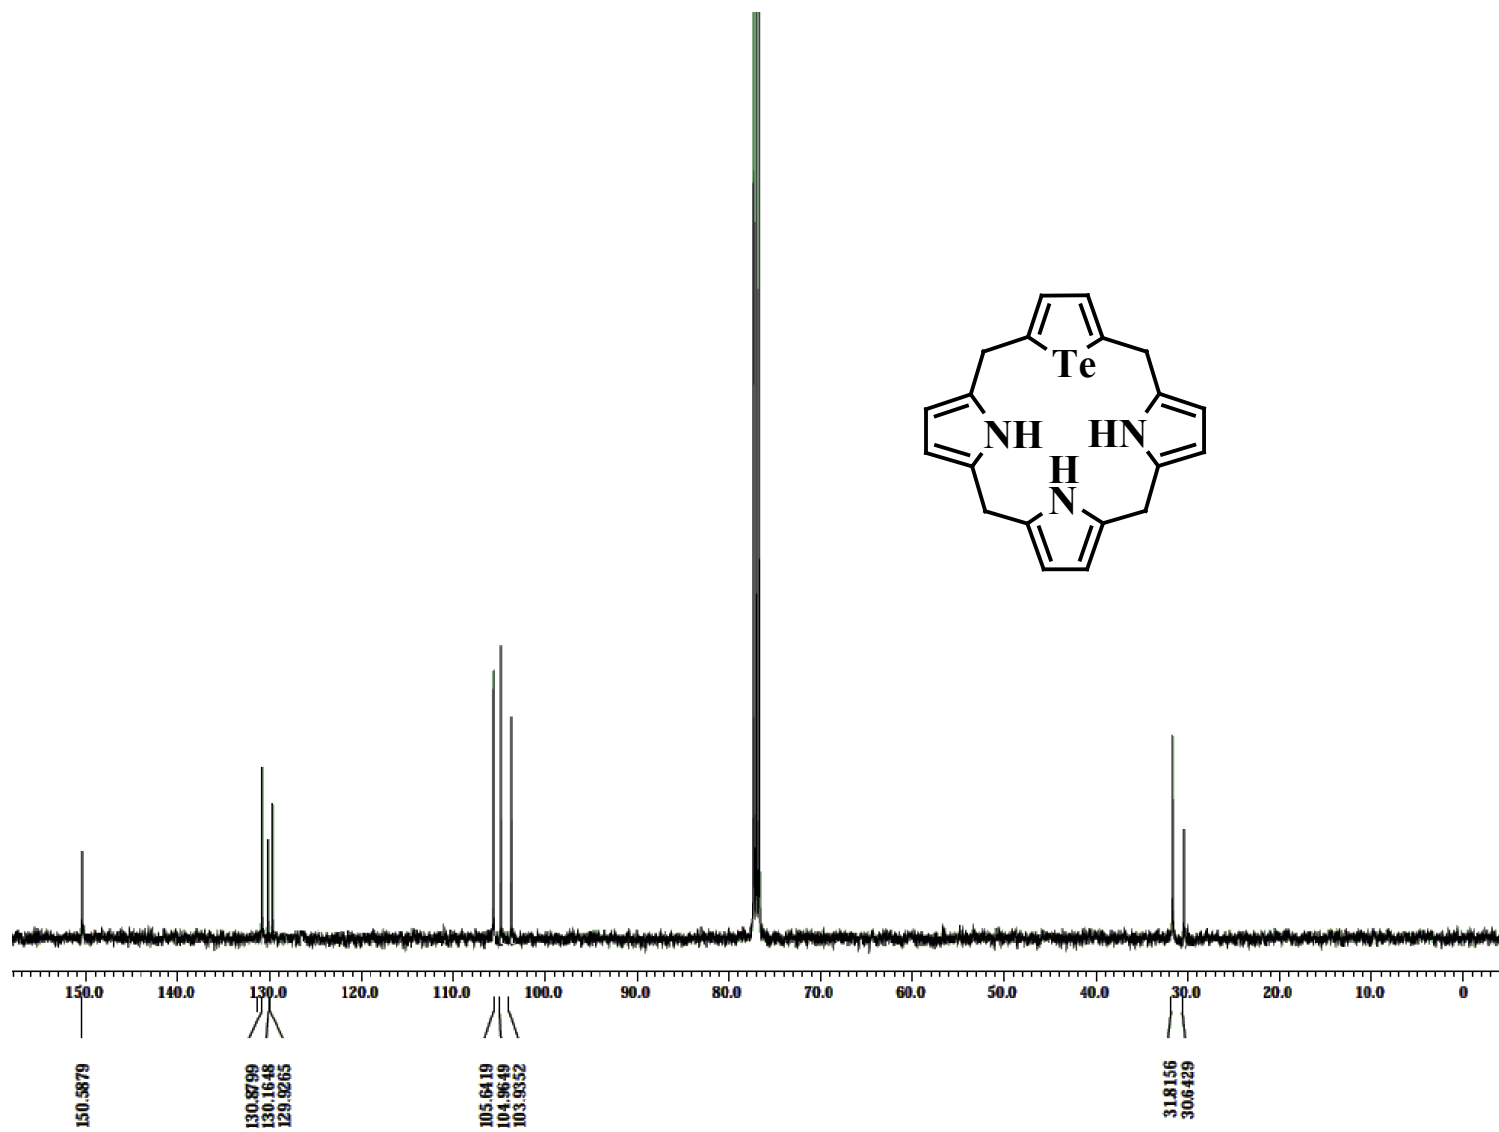

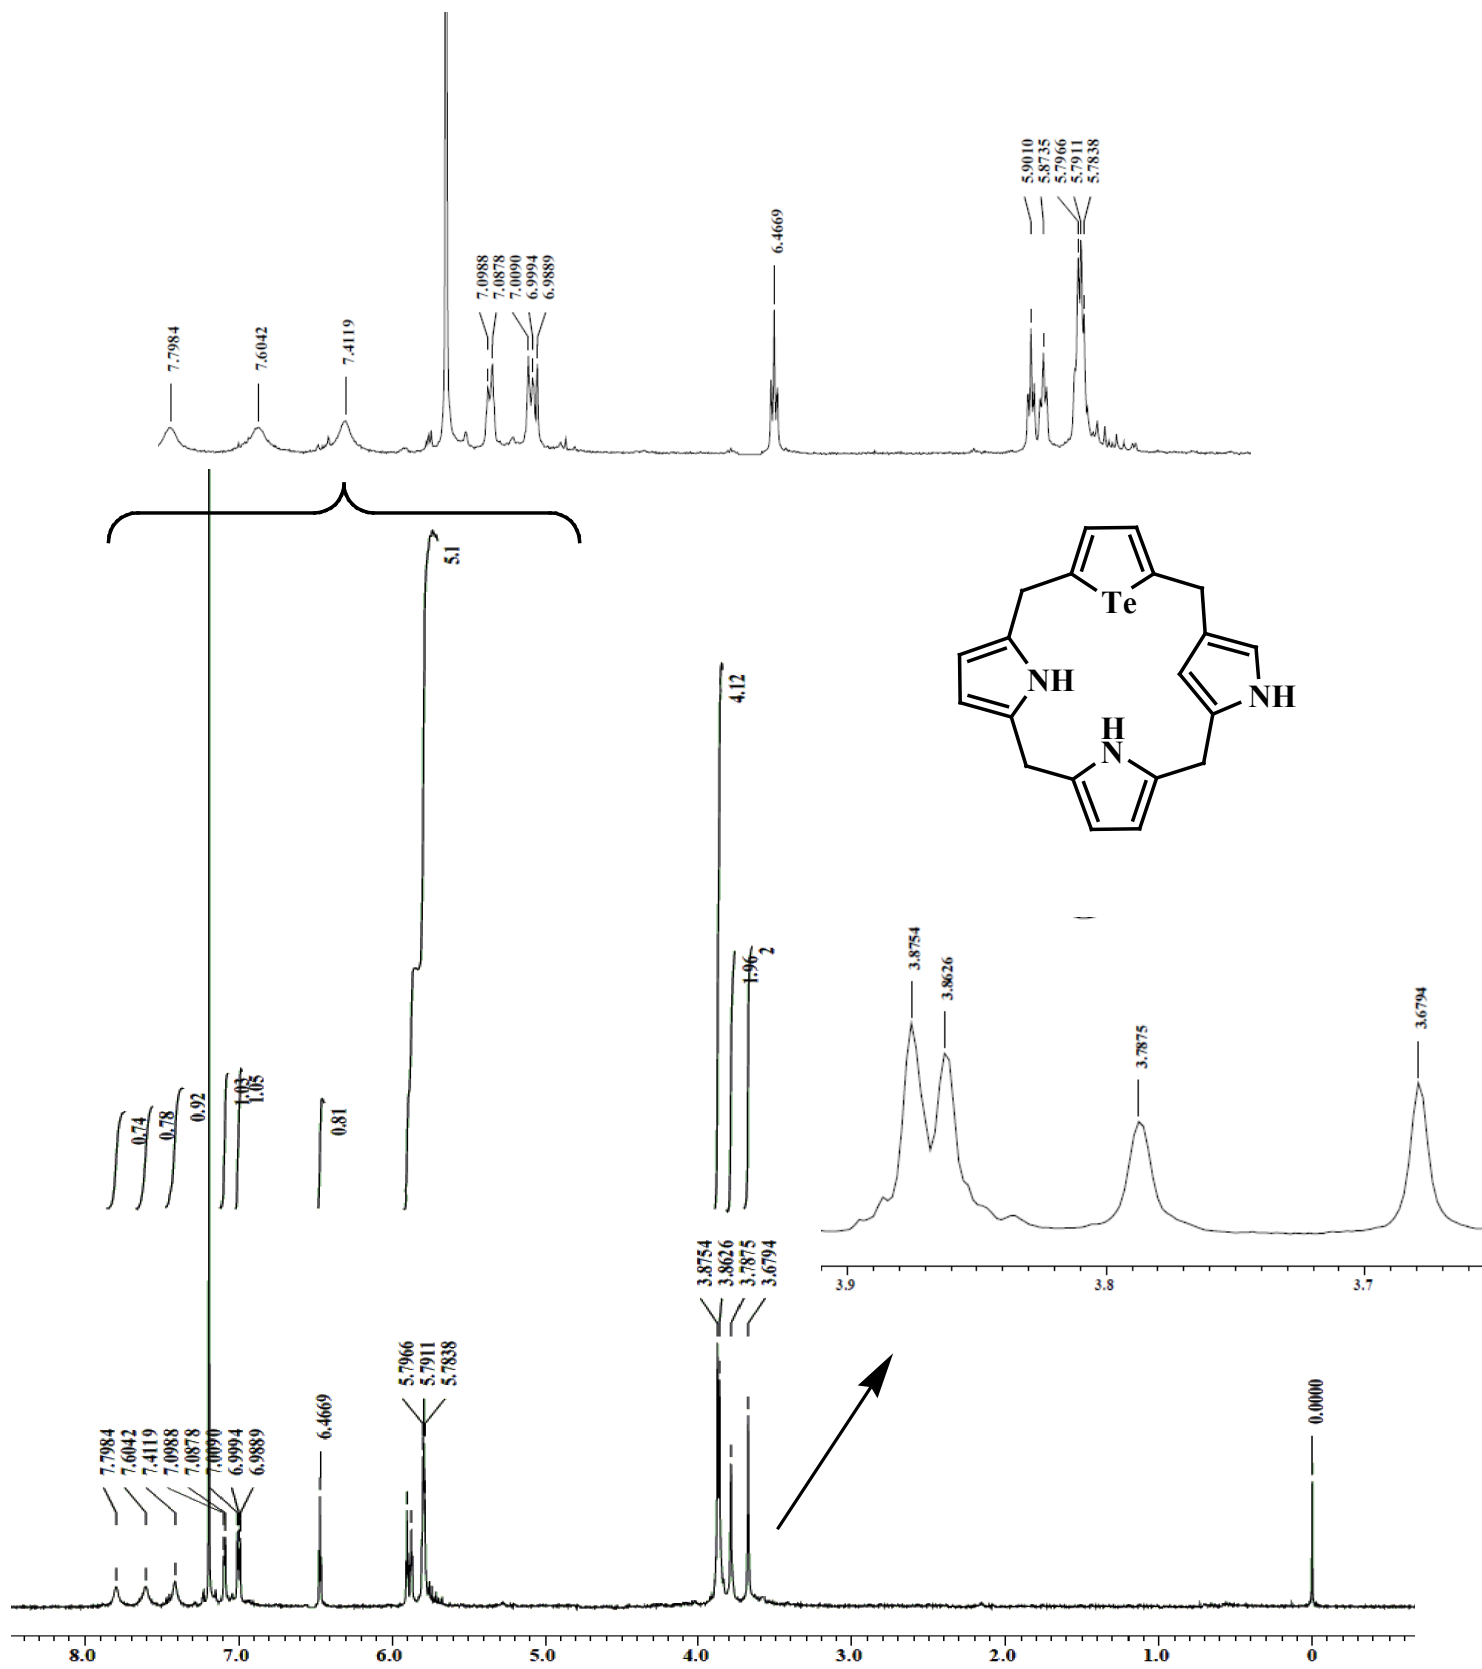

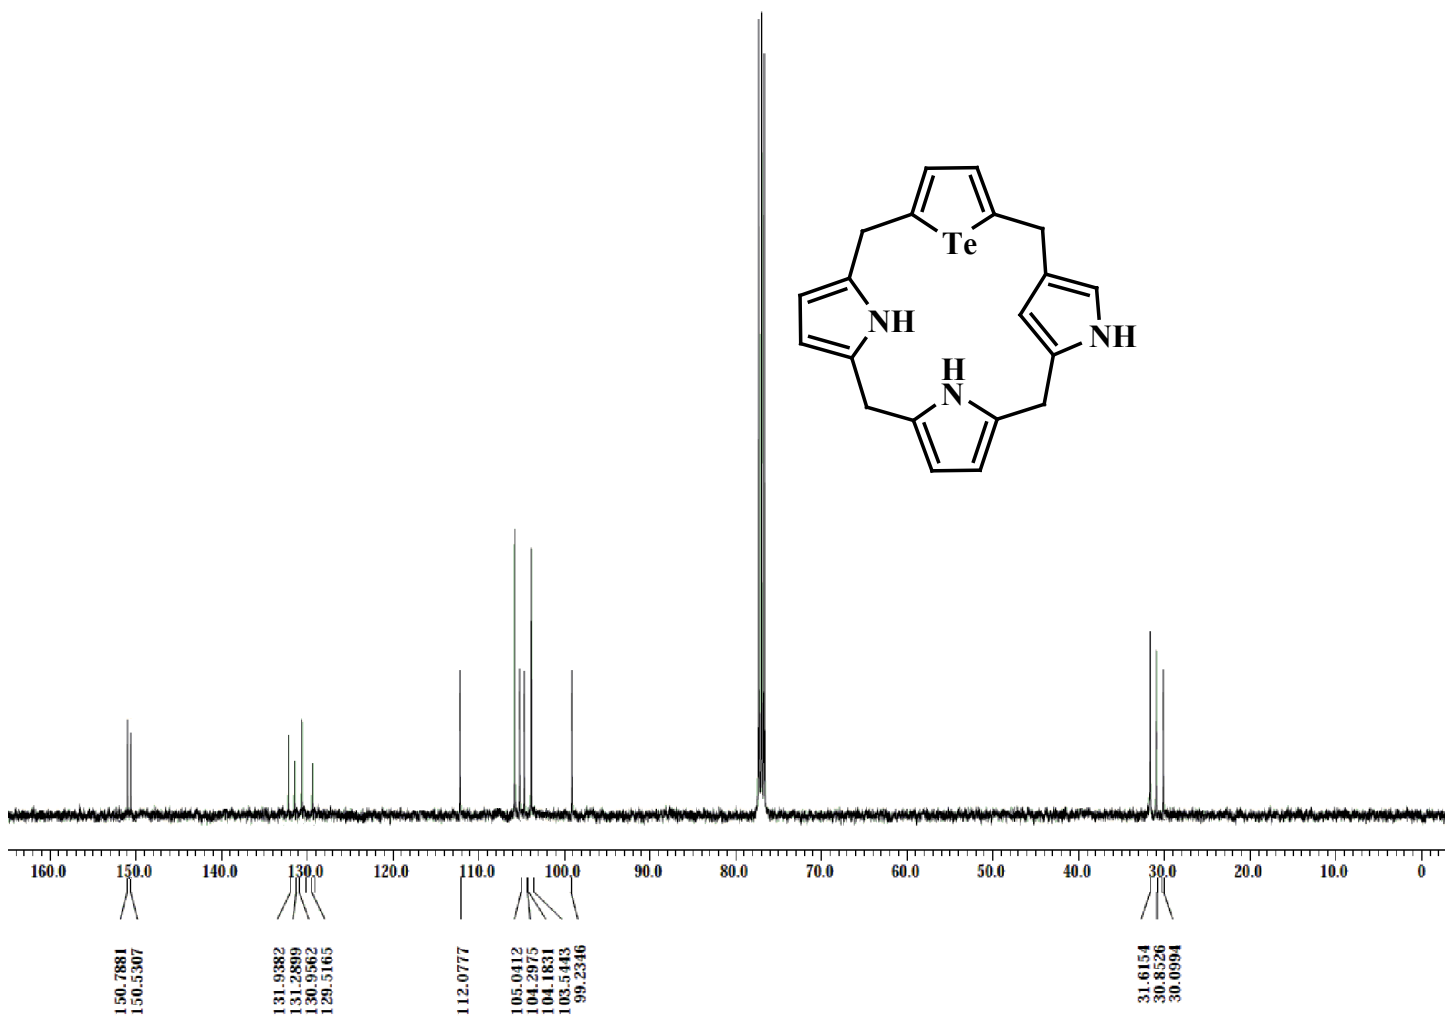



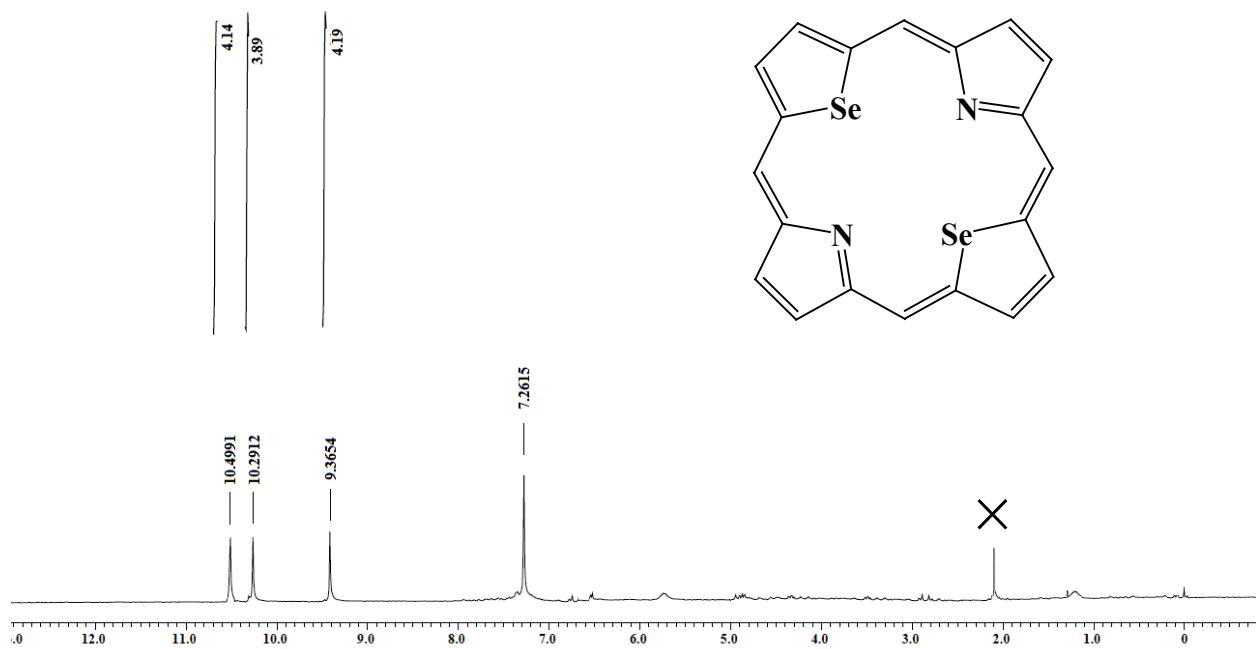

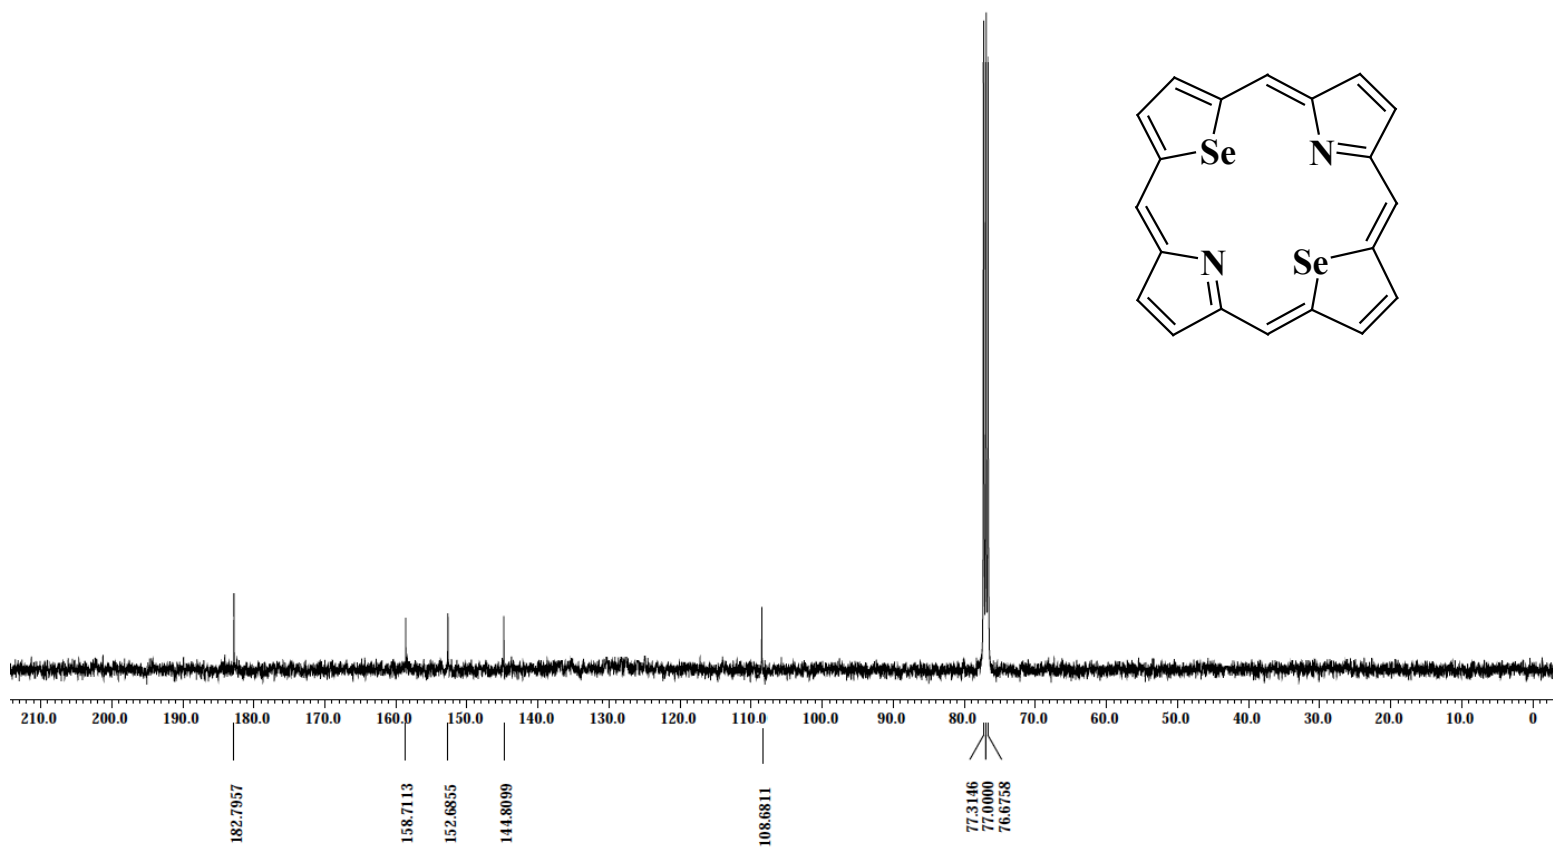

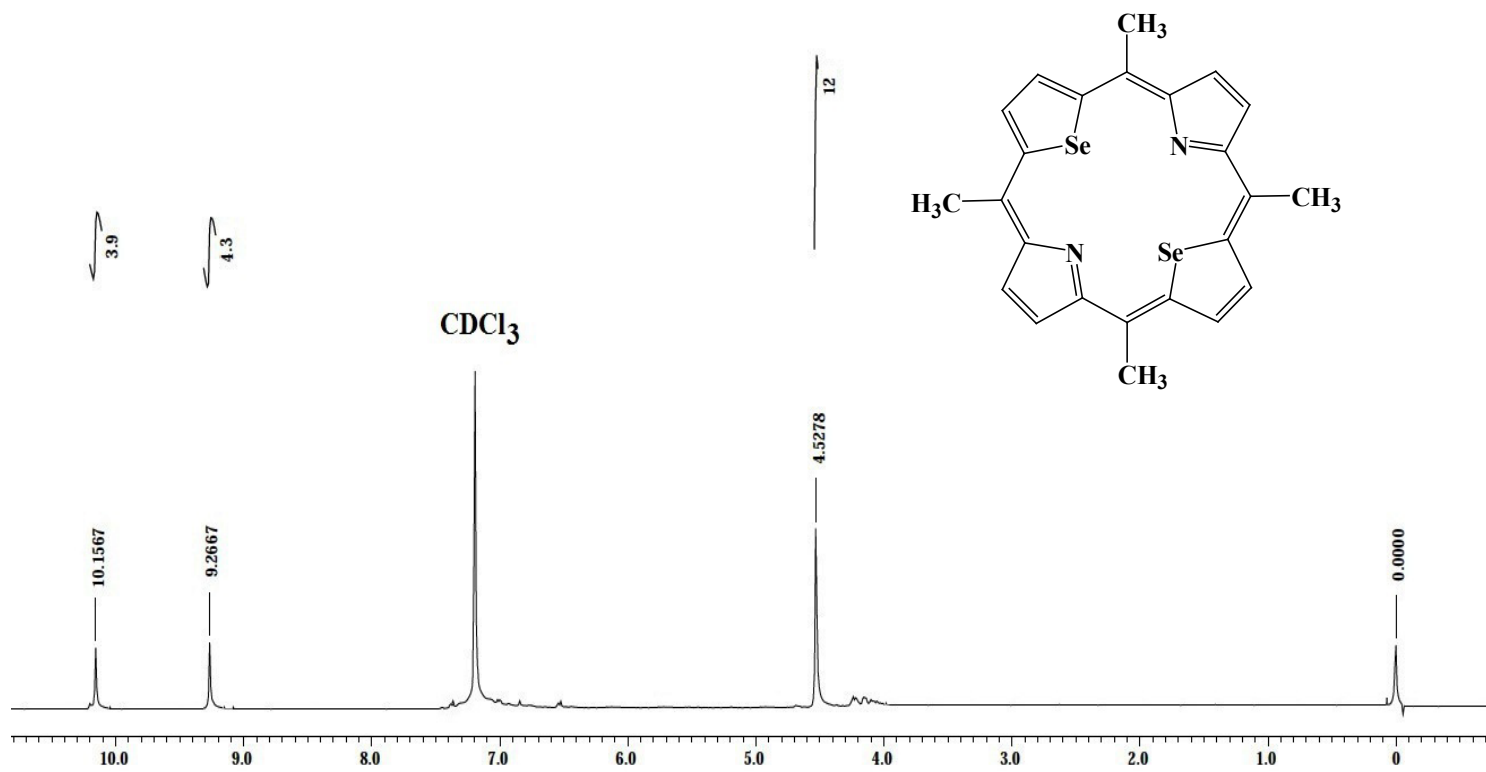

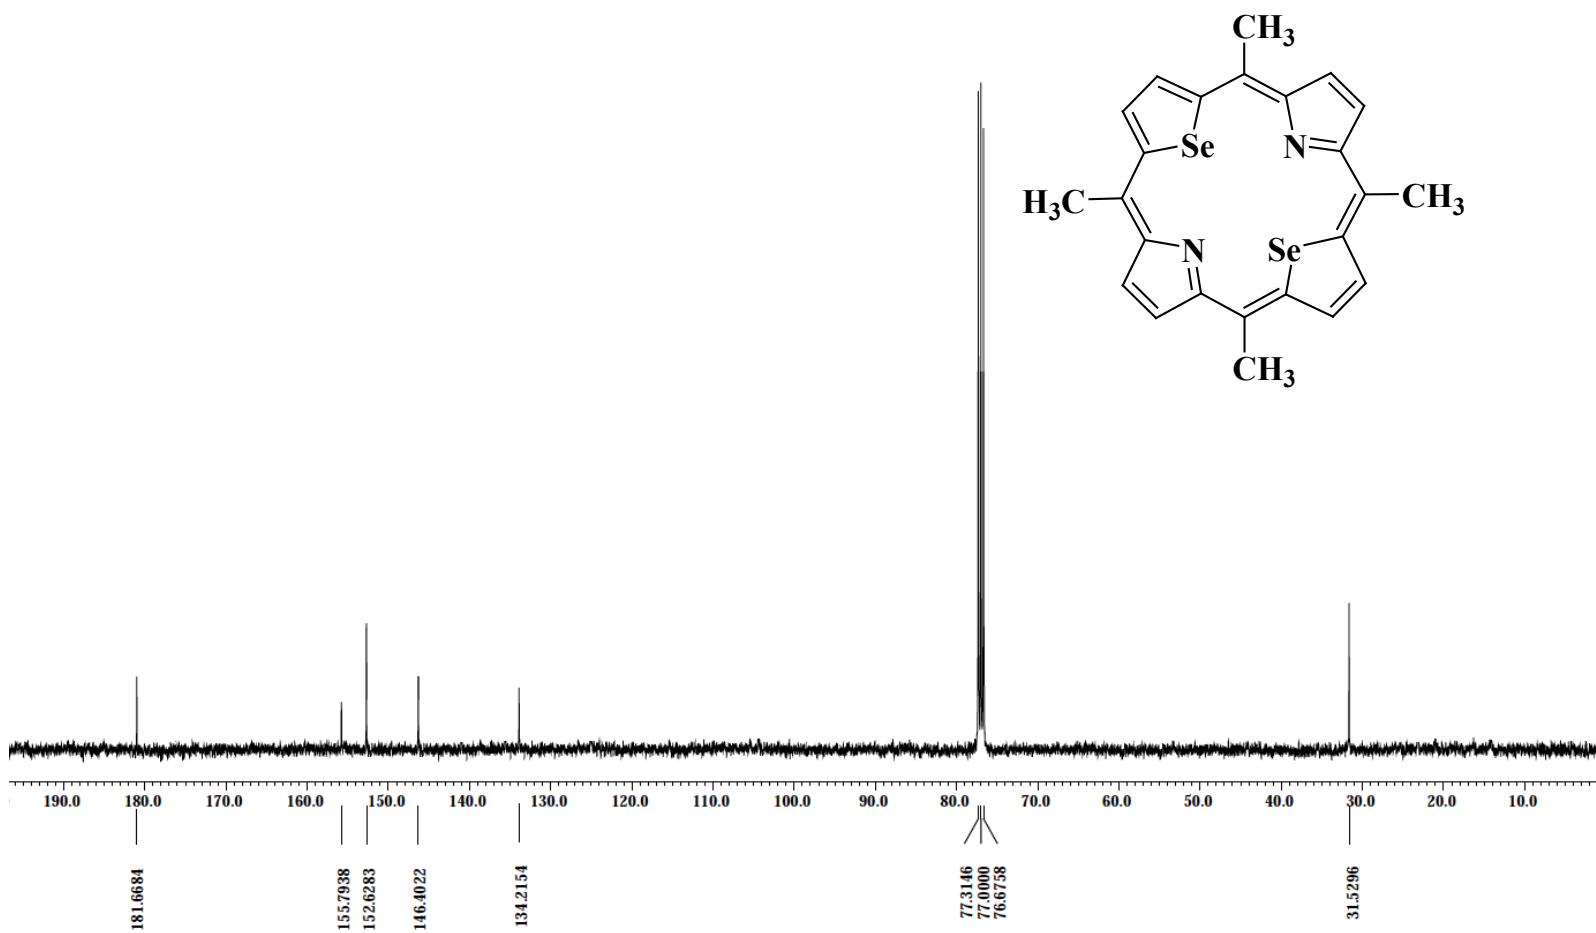

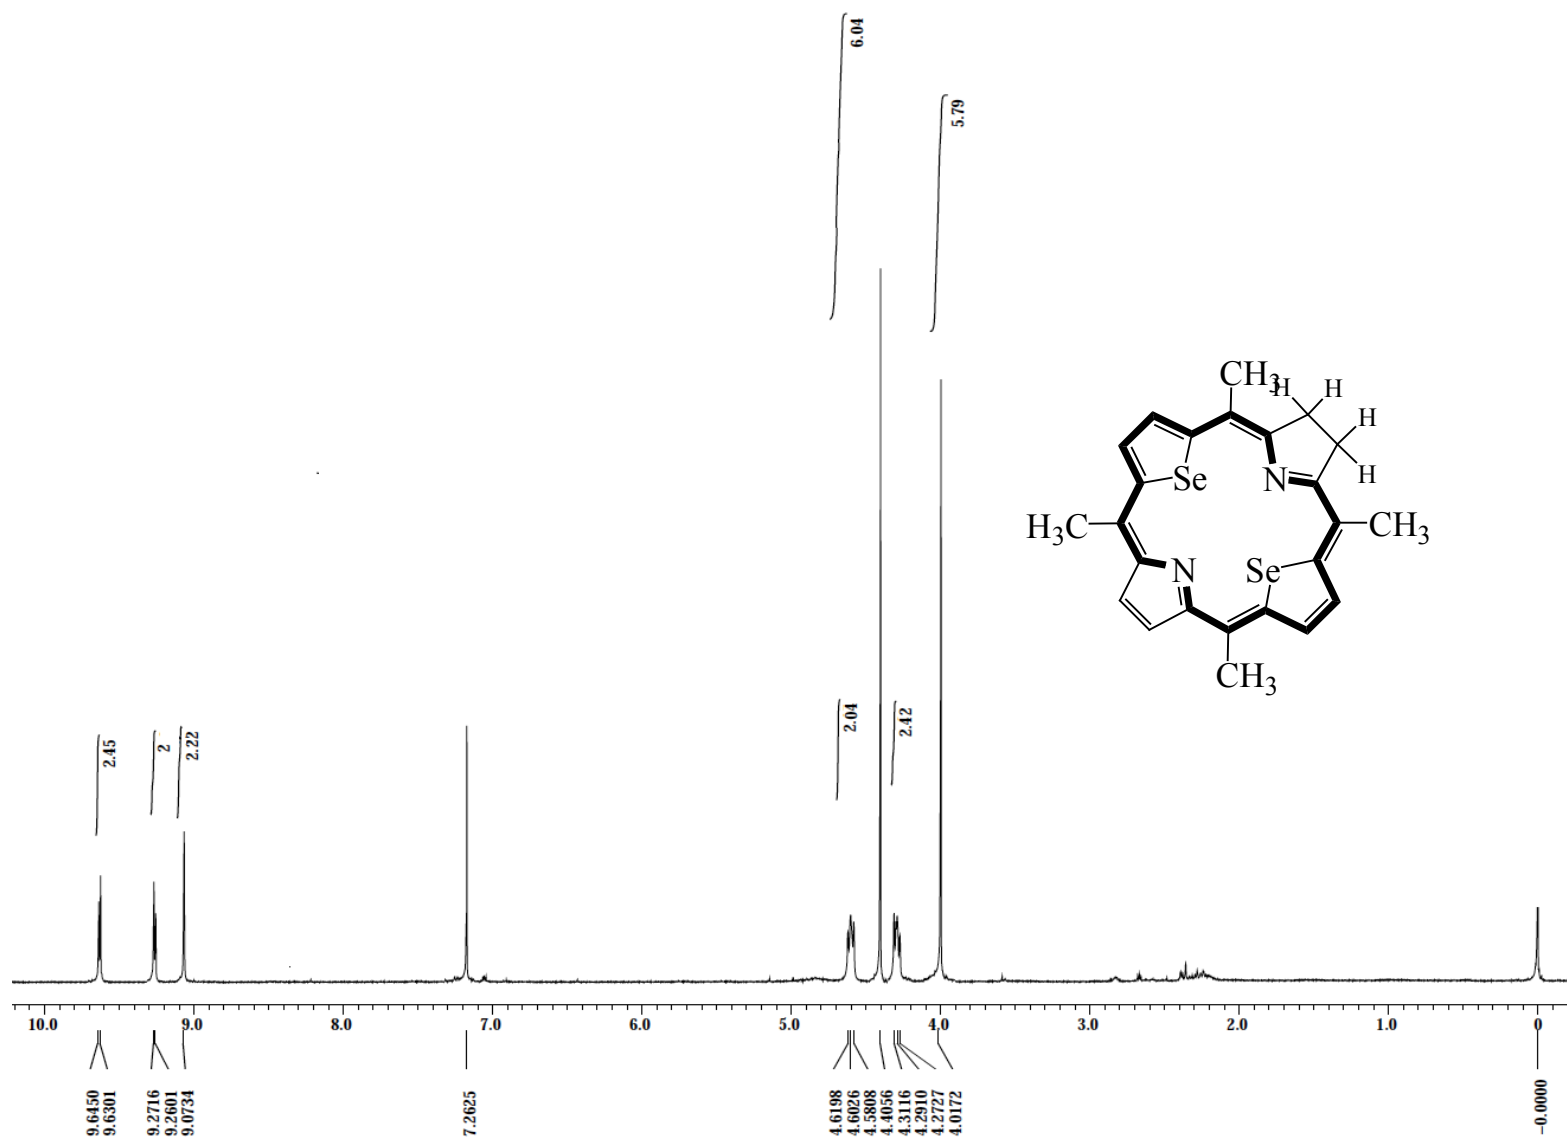

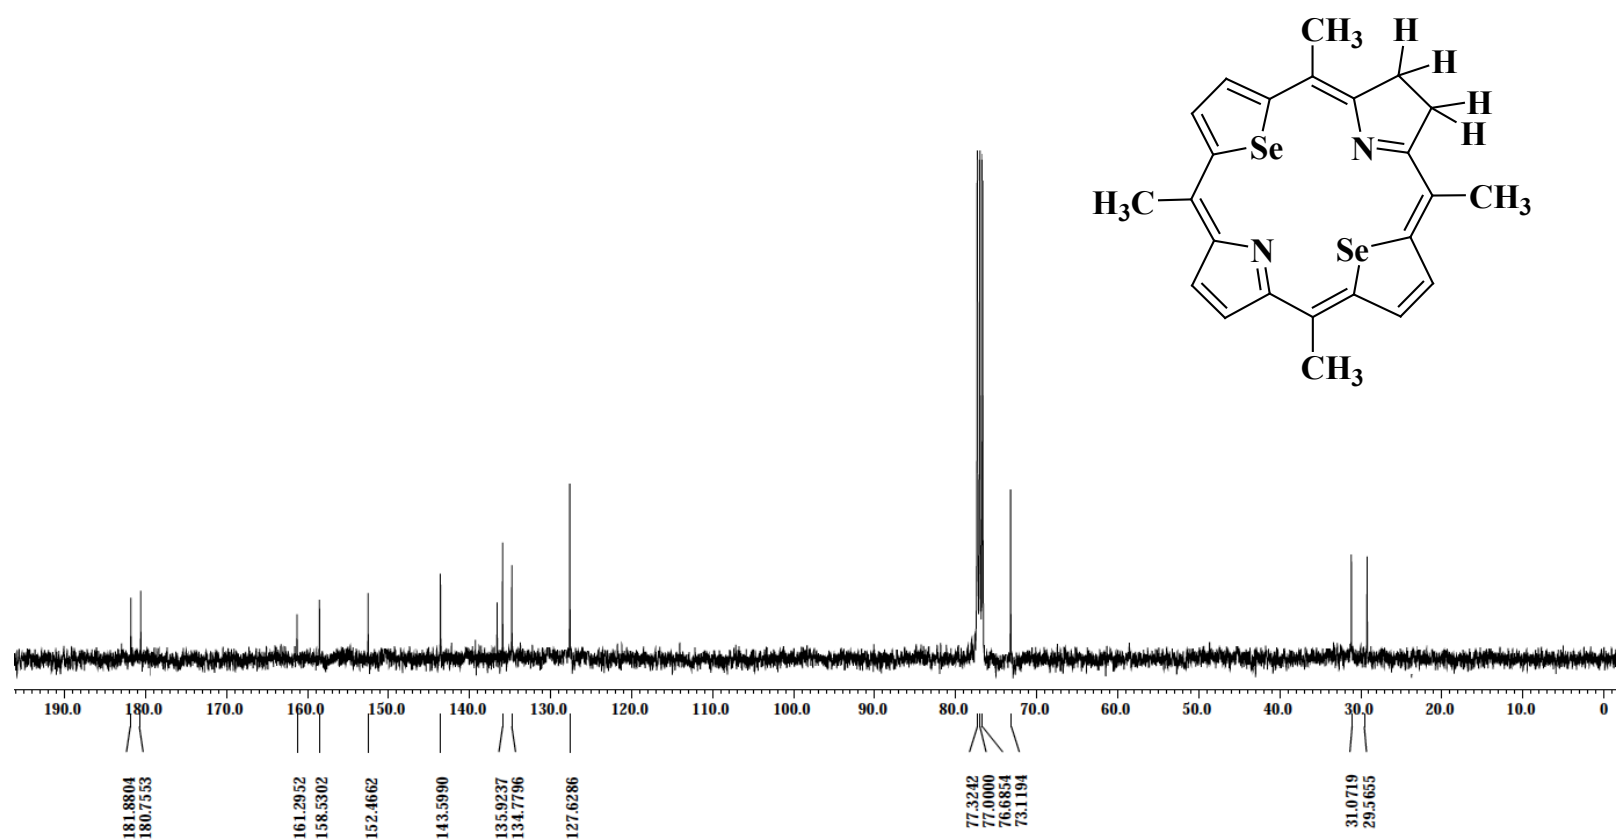

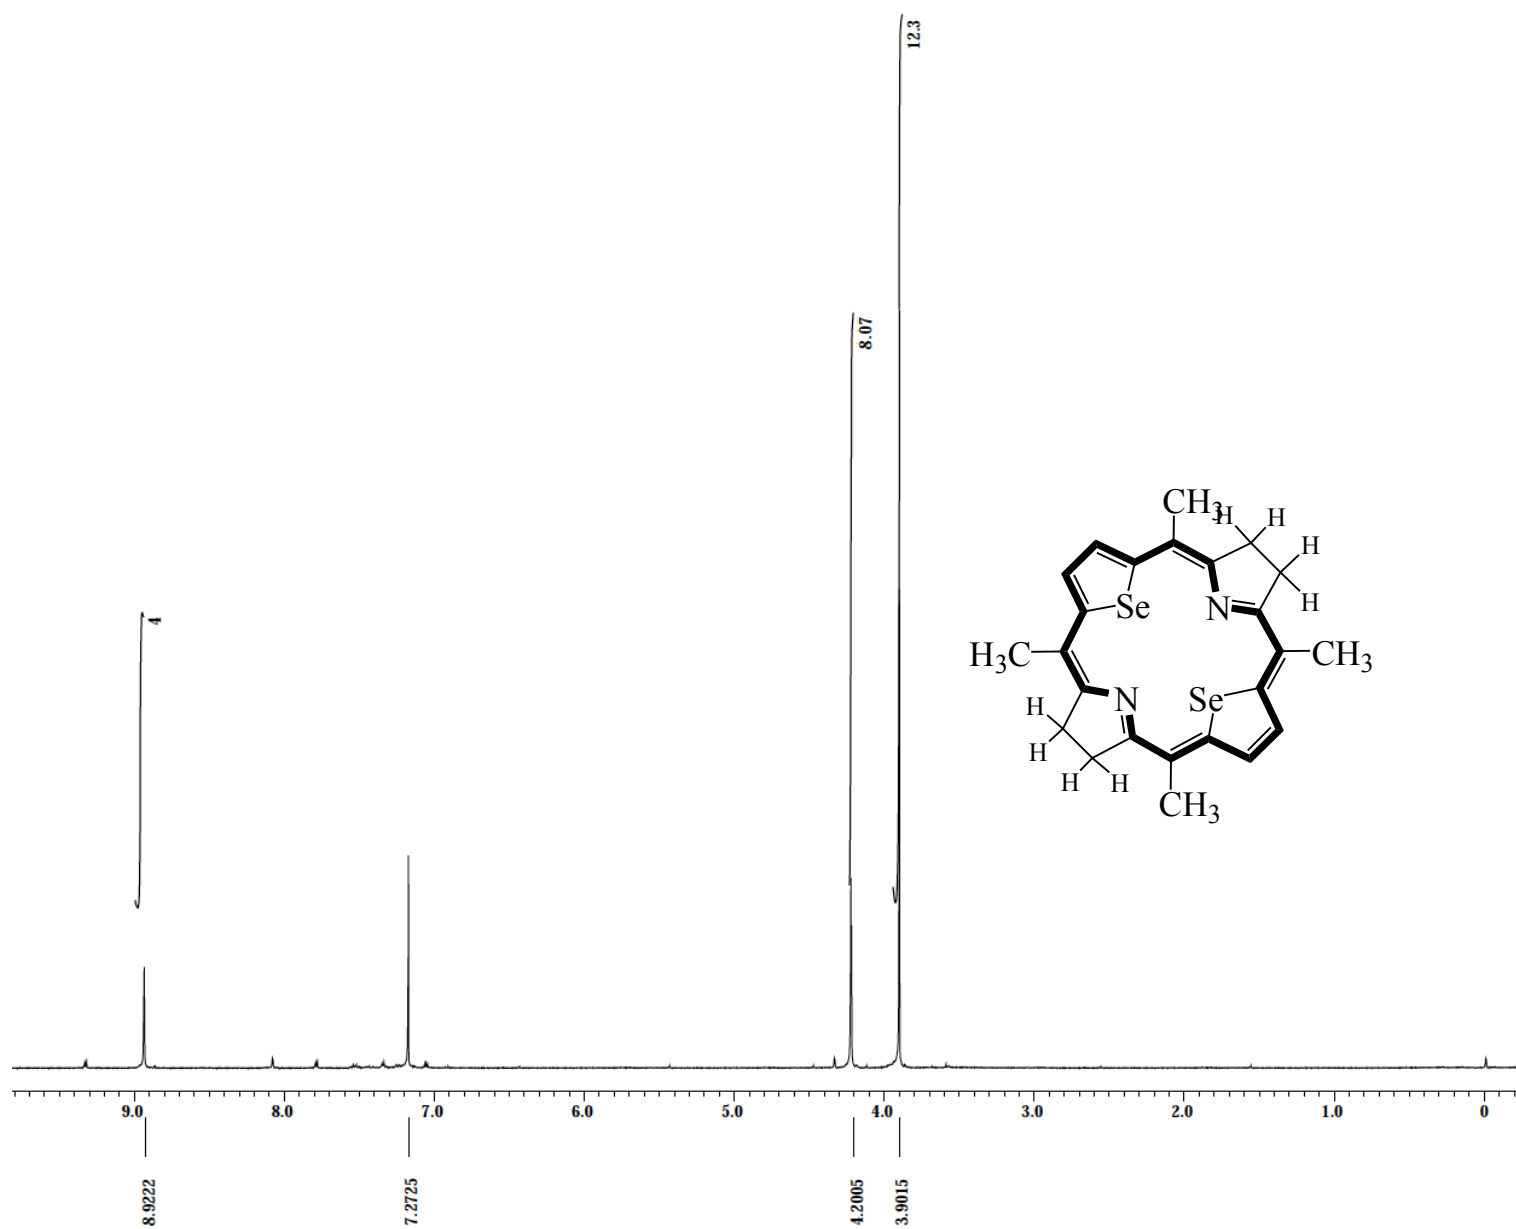

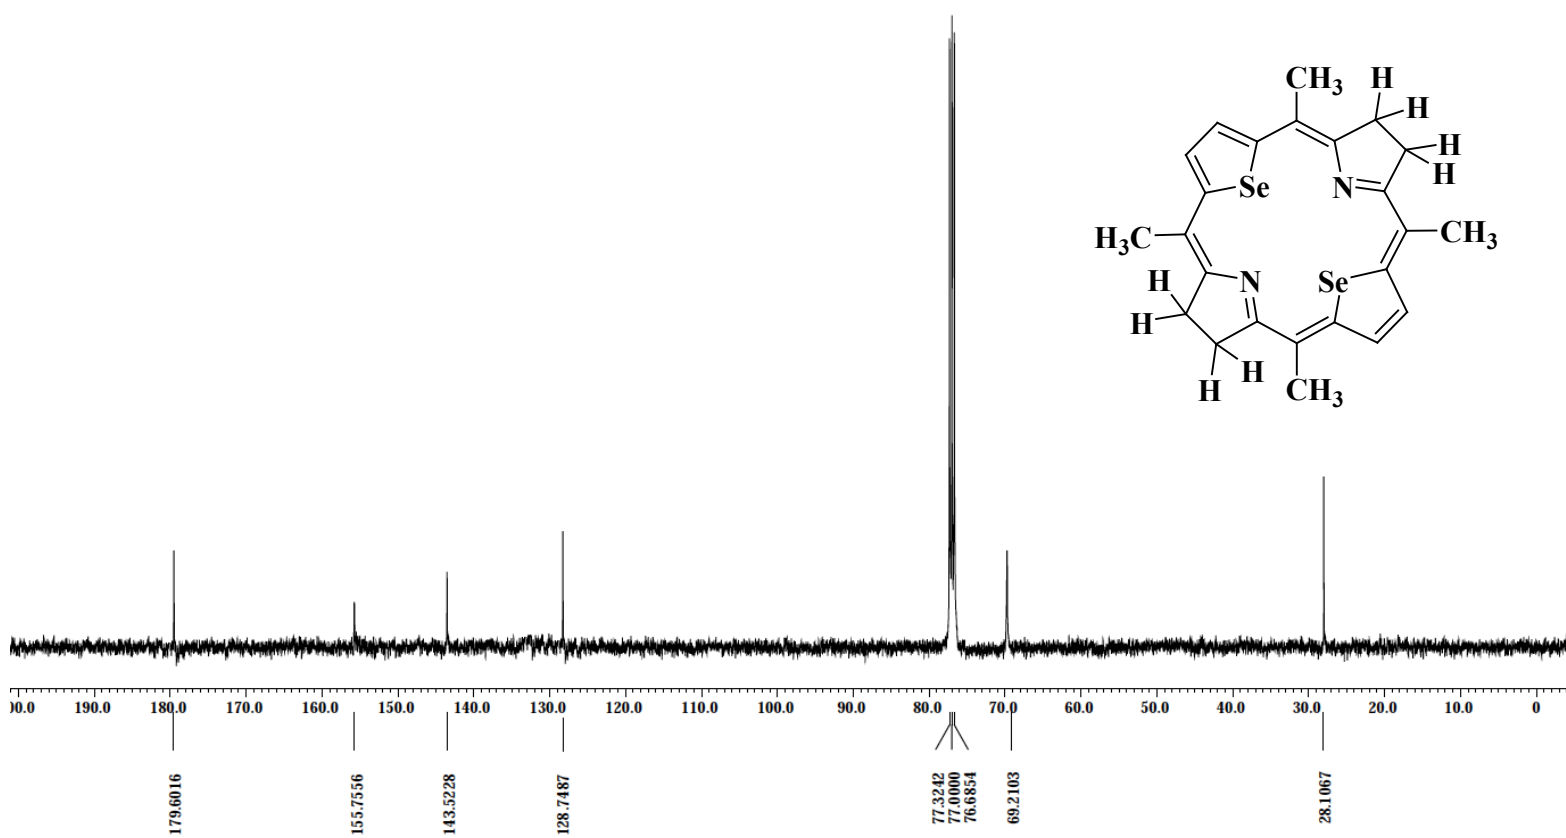



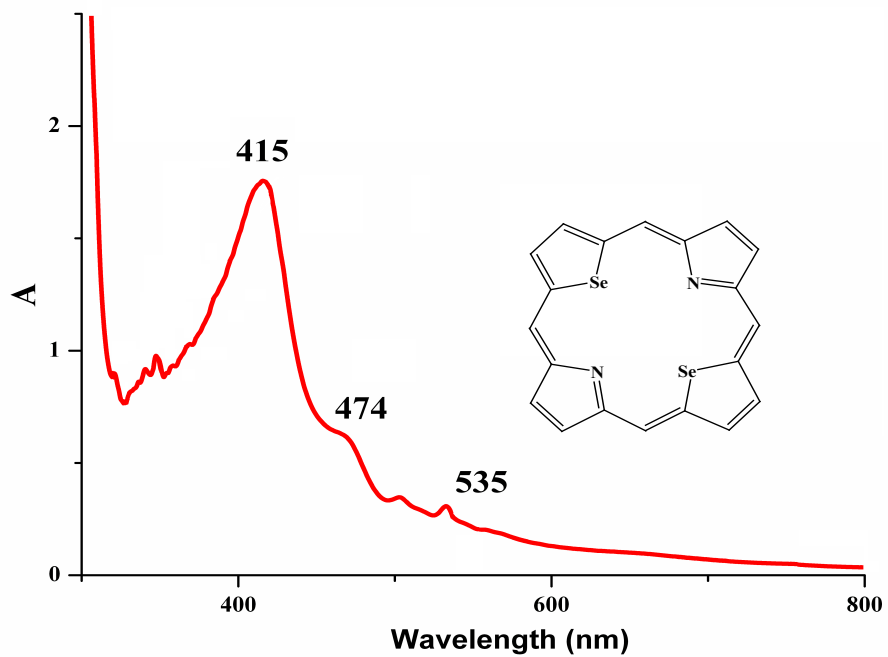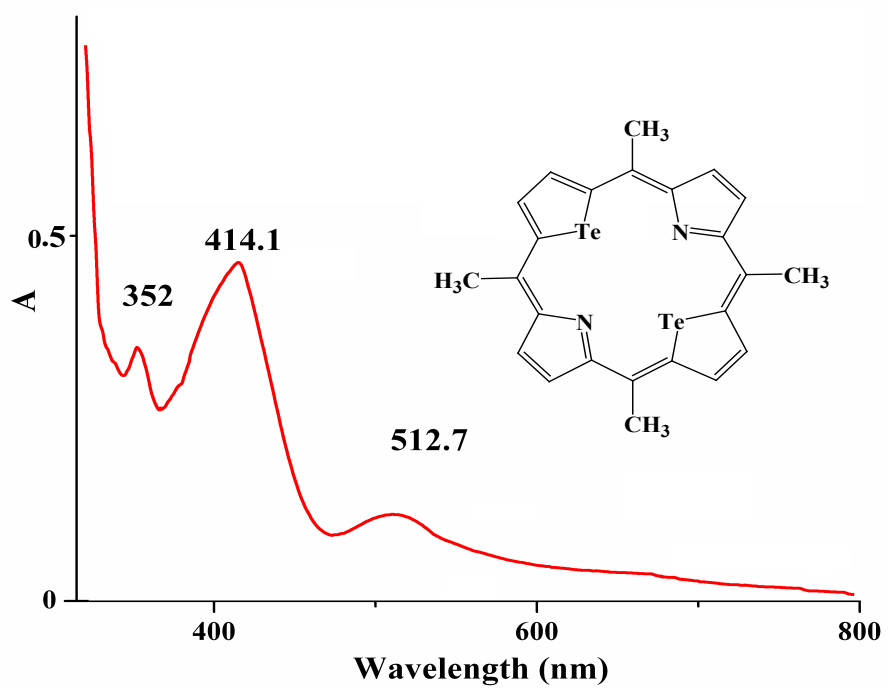

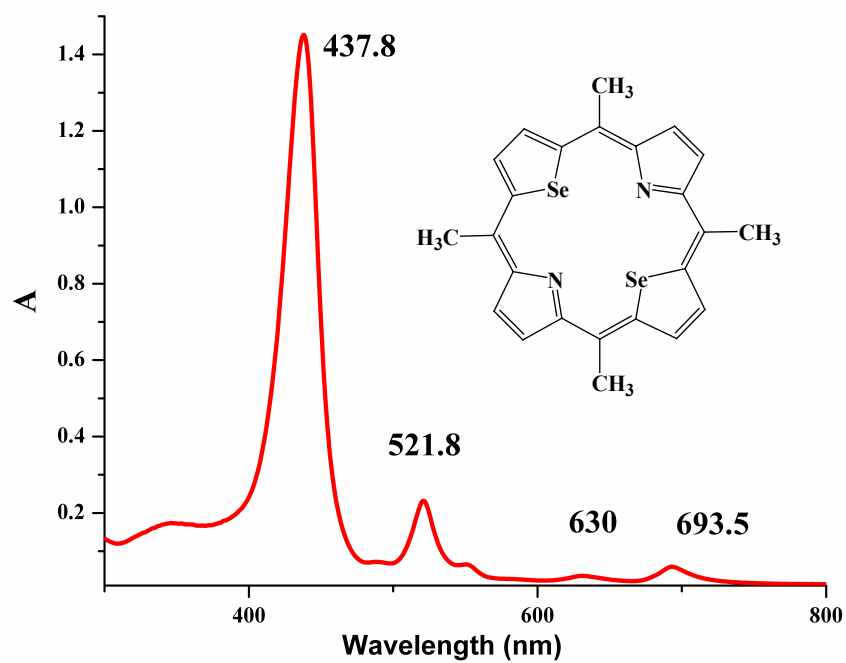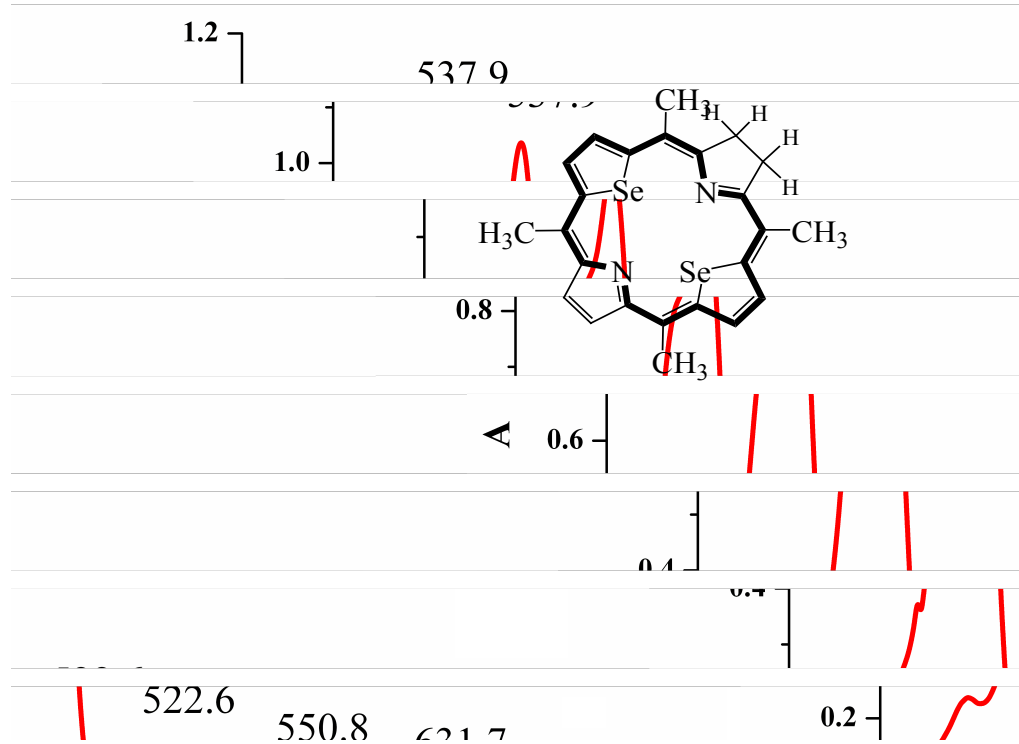

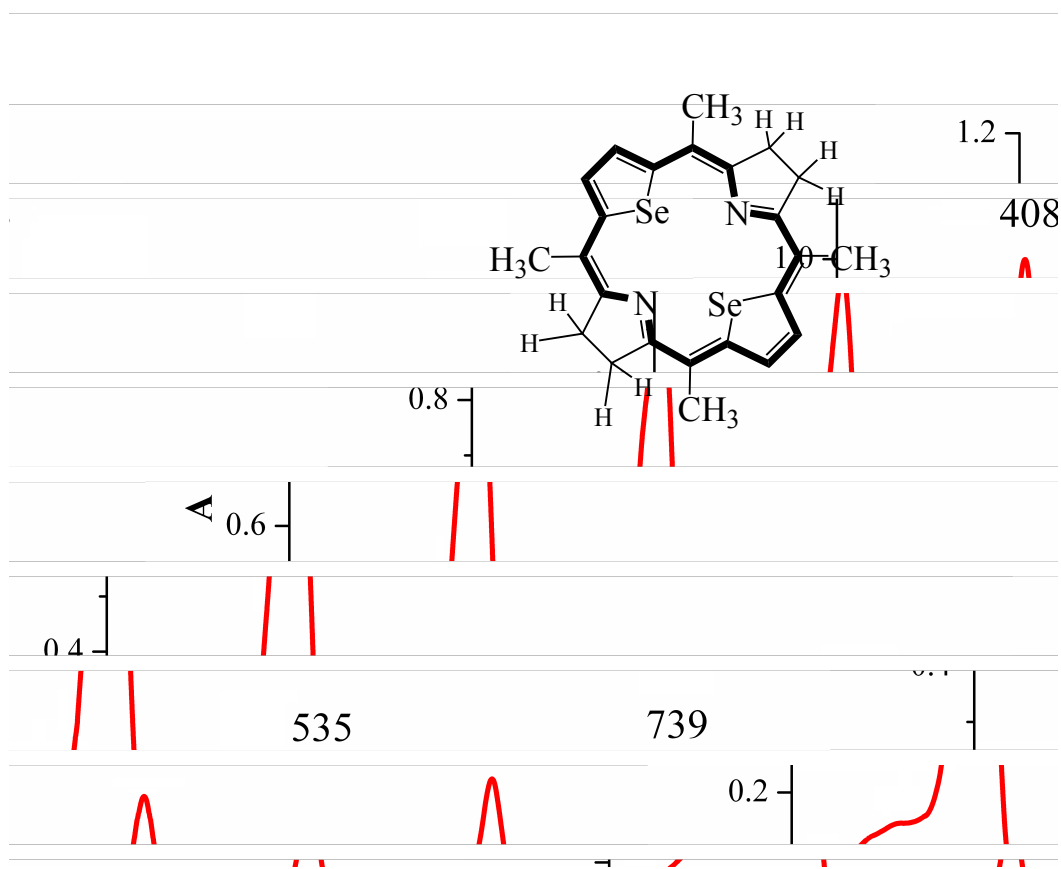

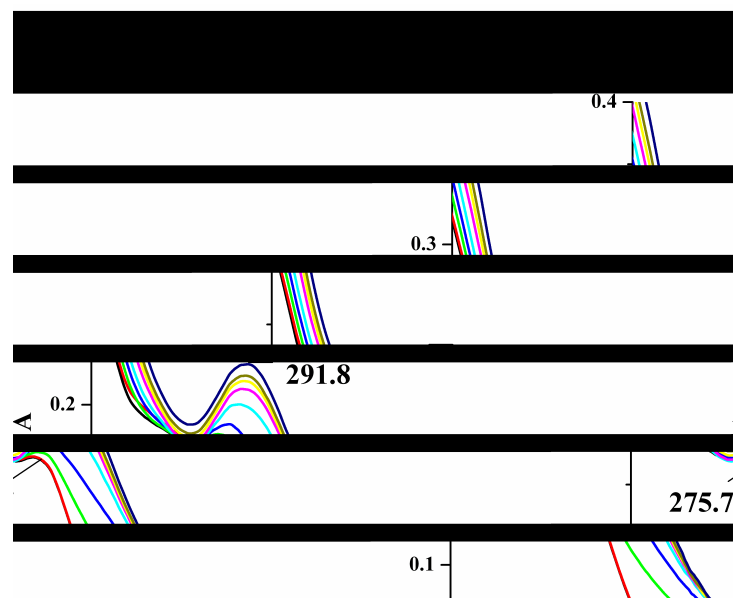

The absorption spectra of **7g** ( $2.0 \times 10^{-3}$ ) in acetonitrile upon the addition of 20  $\mu\text{l}$  stock solution ( $2 \times 10^{-3}$ ) of mercuric perchlorate.

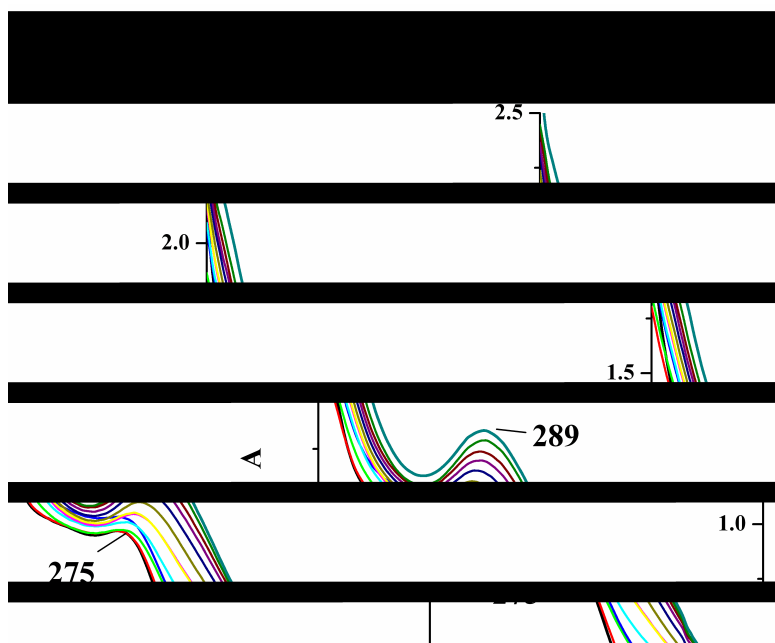

The absorption spectra of **8g** ( $1.8 \times 10^{-3}$ ) in acetonitrile upon the addition of 20  $\mu\text{l}$  stock solution ( $1.8 \times 10^{-3}$ ) of mercuric perchlorate.

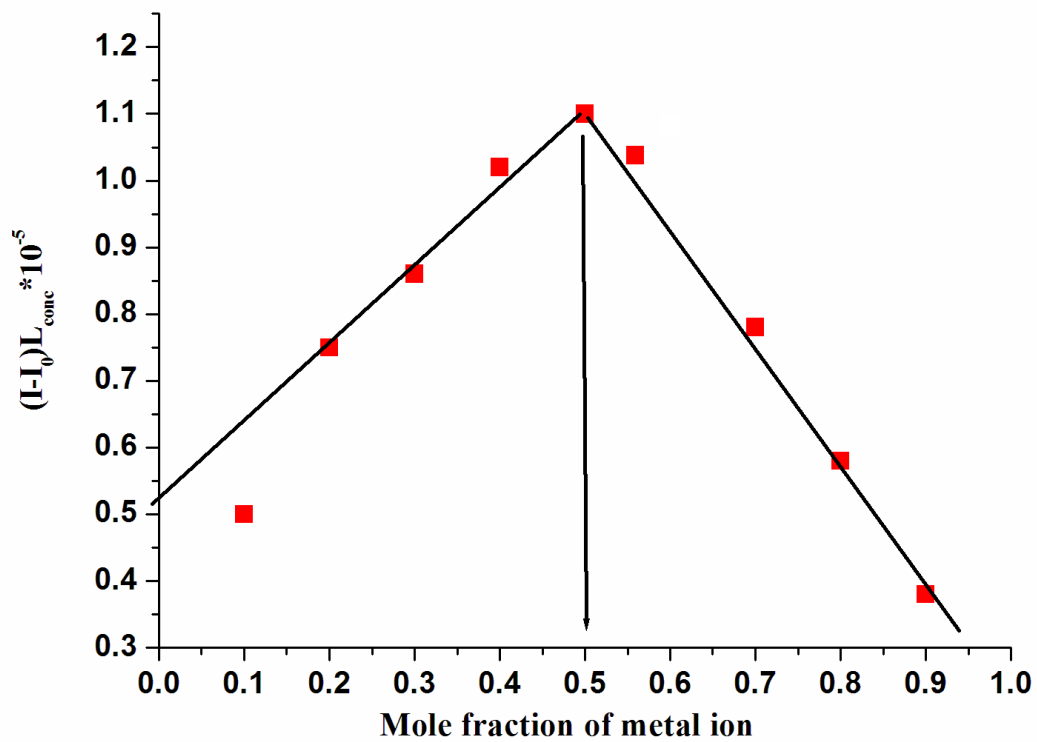

Job's plot for determining the stoichiometry (1:1) of **5g** and Hg<sup>2+</sup> ions in acetonitrile

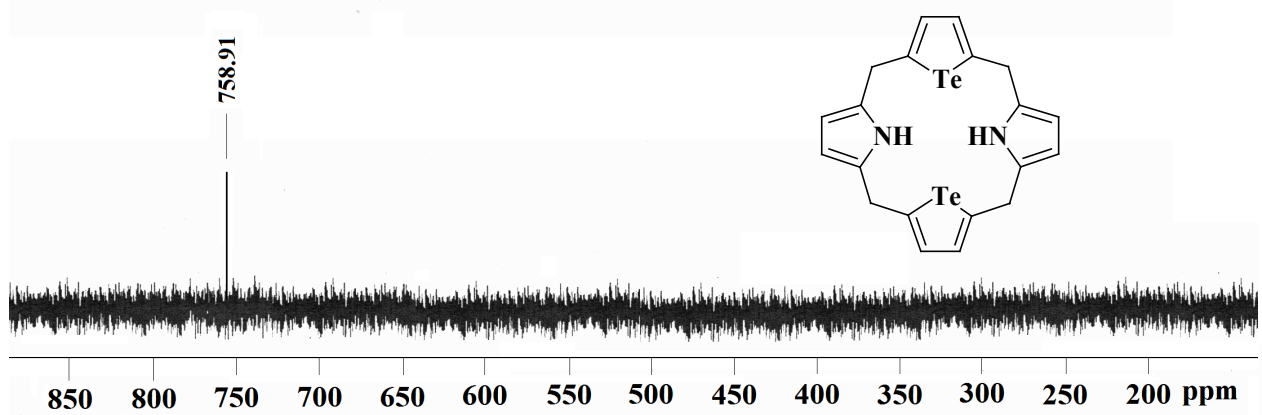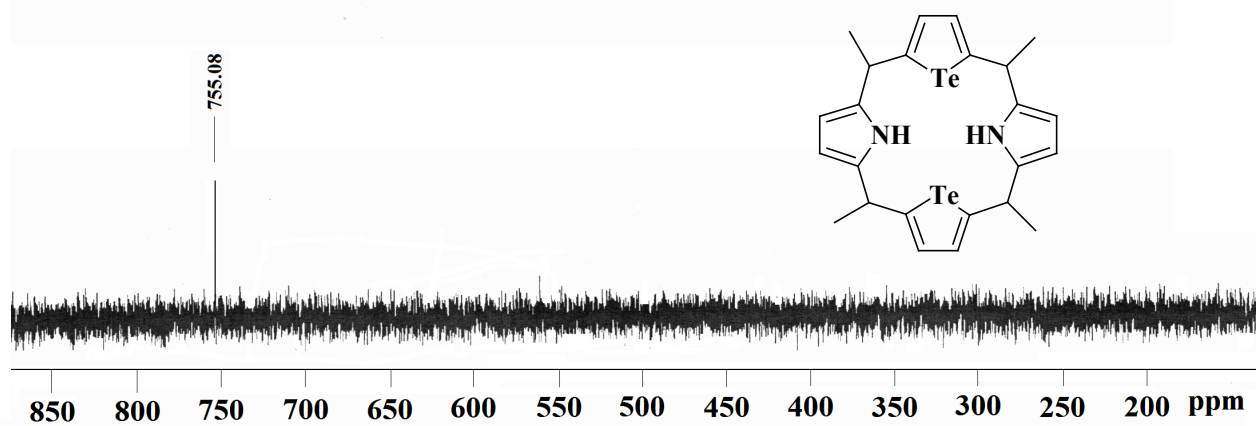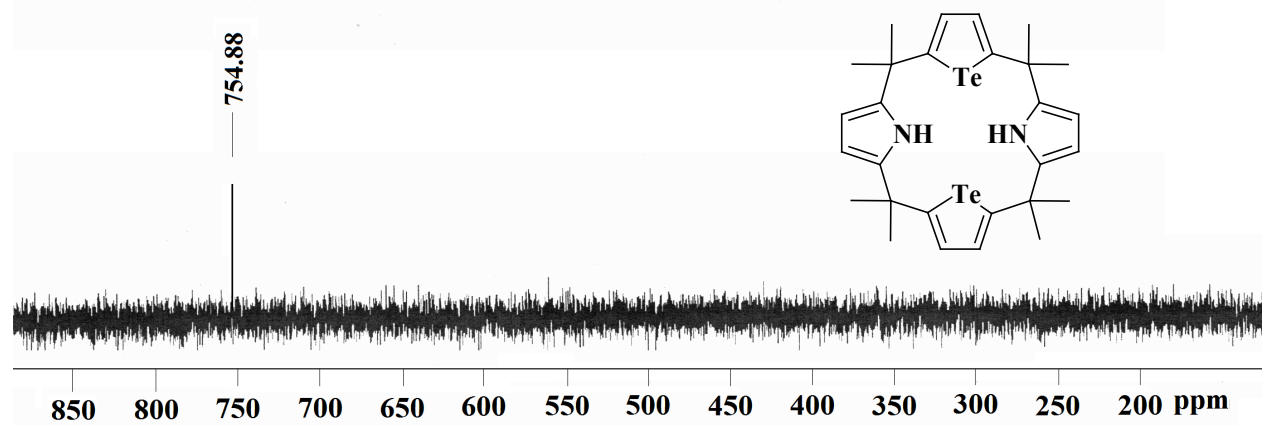

$^{125}\text{Te}$  NMR spectra in  $\text{CDCl}_3$ , relative to  $^{125}\text{TeMe}_2$  ( $\delta$  0.0 ppm).

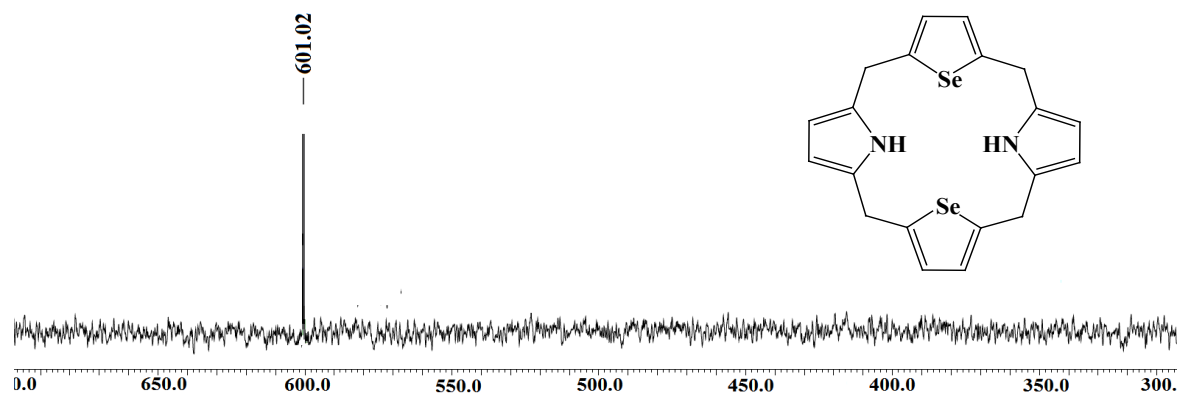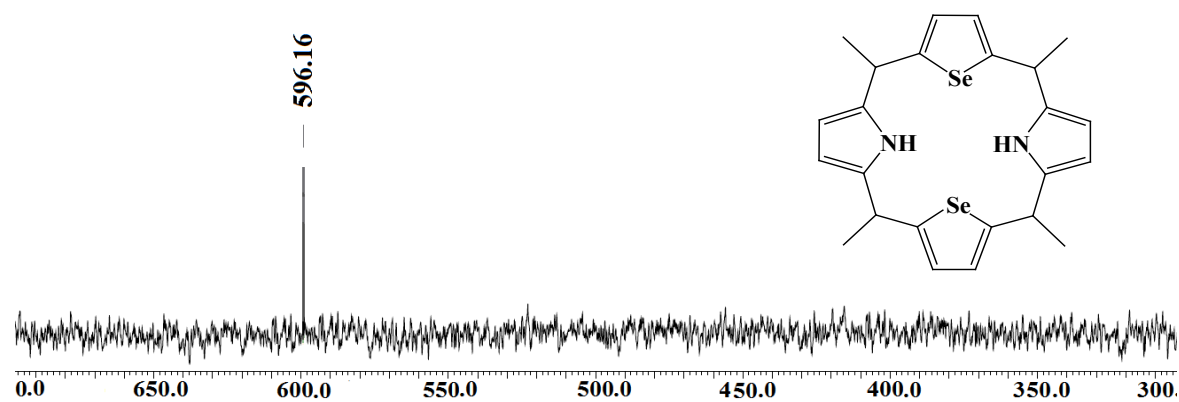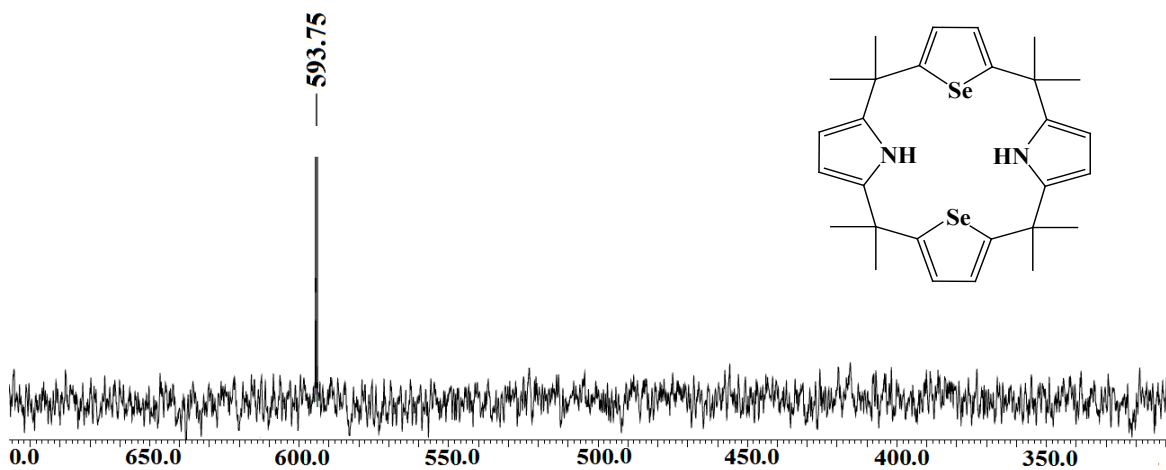

$^{77}\text{Se}$  NMR spectra in  $\text{CDCl}_3$ .

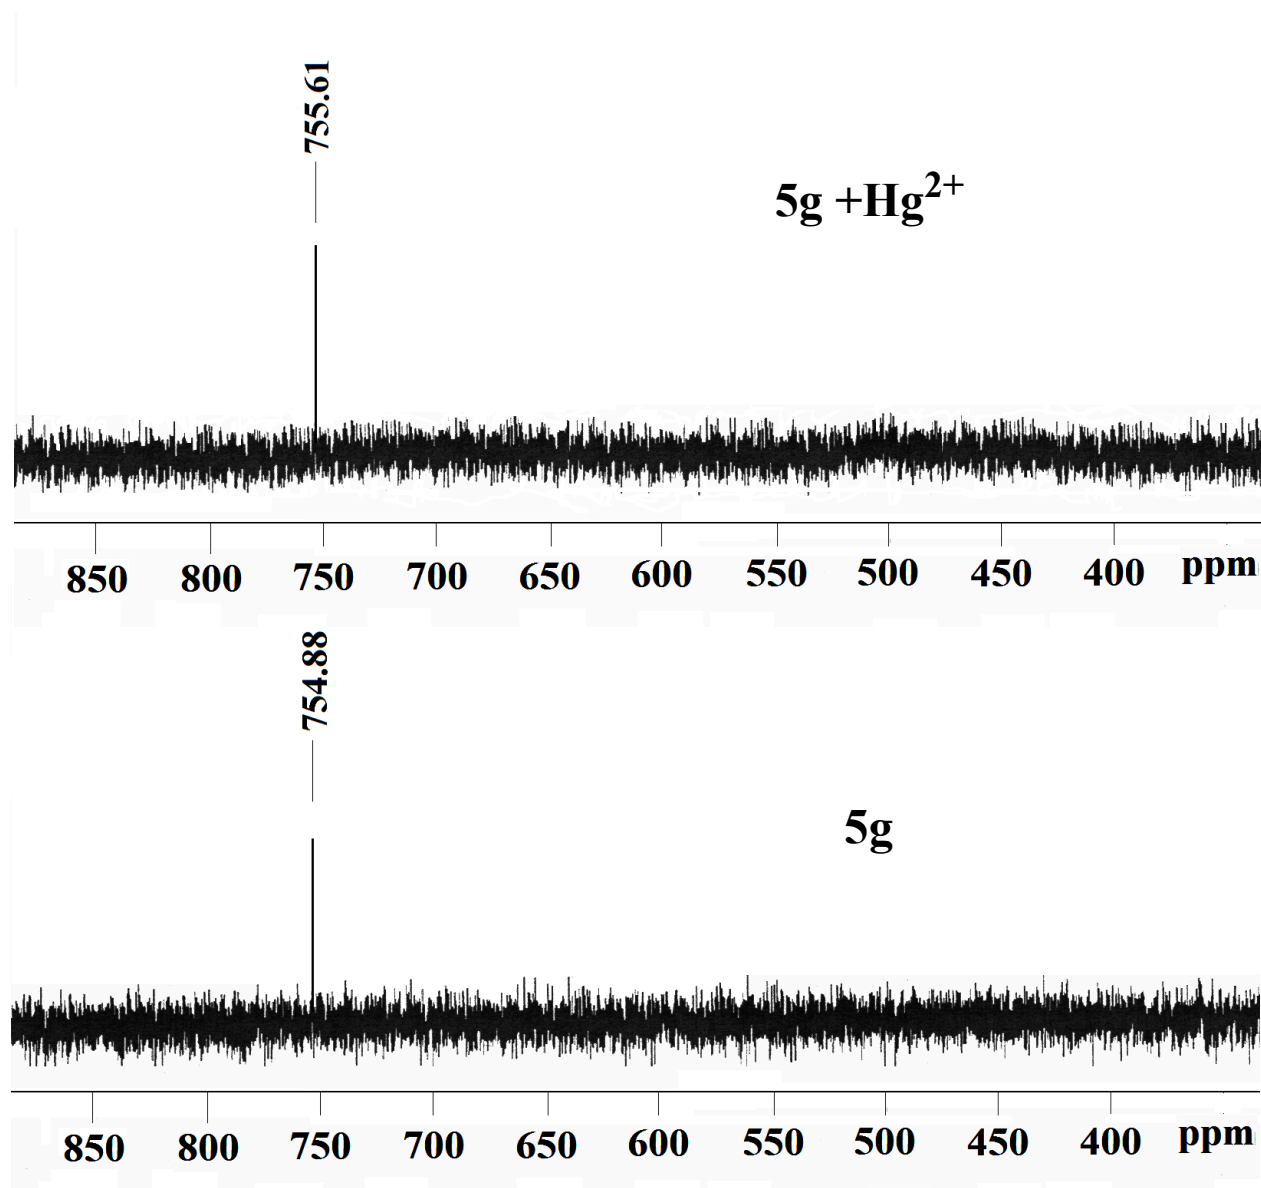

$^{125}\text{Te}$  NMR spectra of **5g** with and without  $\text{Hg}^{2+}$  in  $\text{CDCl}_3$ , relative to  $^{125}\text{TeMe}_2$  ( $\delta$  0.0 ppm).



# Mass

## Qualitative Analysis Report

|                               |                             |                      |                                                                  |
|-------------------------------|-----------------------------|----------------------|------------------------------------------------------------------|
| <b>Data Filename</b>          | A003.d                      | <b>Sample Name</b>   | A <i>C<sub>28</sub>H<sub>34</sub>N<sub>2</sub>Te<sub>2</sub></i> |
| <b>Sample Type</b>            | Sample                      | <b>Position</b>      | P1-F1 <i>Te-Te Dimethyl</i>                                      |
| <b>Instrument Name</b>        | Instrument 1                | <b>User Name</b>     | SANJAY PANDEY                                                    |
| <b>Acq Method</b>             | DAILY MS.m                  | <b>Acquired Time</b> | 15-04-2013 12:57:20                                              |
| <b>IRM Calibration Status</b> | Success                     | <b>DA Method</b>     | default.m                                                        |
| <b>Comment</b>                |                             |                      |                                                                  |
| <b>Sample Group</b>           |                             | <b>Info.</b>         |                                                                  |
| <b>Acquisition SW</b>         | 6200 series TOF/6500 series |                      |                                                                  |
| <b>Version</b>                | Q-TOF B.05.01 (B5125)       |                      |                                                                  |

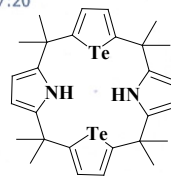

**C<sub>28</sub>H<sub>34</sub>N<sub>2</sub>Te<sub>2</sub>**  
**Exact Mass: 658.08466**

### User Spectra

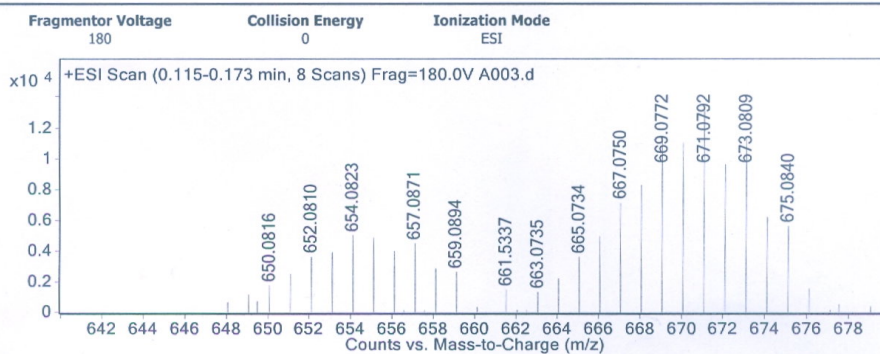

### Peak List

| m/z      | z | Abund    |
|----------|---|----------|
| 536.1635 | 1 | 3088.93  |
| 610.1819 | 1 | 4848.05  |
| 611.1816 | 1 | 3044.42  |
| 612.1798 | 1 | 2233.32  |
| 651.084  |   | 2480.09  |
| 652.081  |   | 3628.41  |
| 653.0844 |   | 3899.03  |
| 654.0823 |   | 5010.23  |
| 655.0858 |   | 4874.52  |
| 656.0836 |   | 4003.2   |
| 657.0871 | 1 | 4492.68  |
| 658.0865 | 1 | 2874.93  |
| 659.0894 | 1 | 2624.35  |
| 664.0719 |   | 2195.83  |
| 665.0734 |   | 3598.56  |
| 666.0734 |   | 4973.82  |
| 667.075  |   | 7113.13  |
| 668.0756 |   | 8263.29  |
| 669.0772 |   | 11380.85 |
| 670.0768 |   | 11029.67 |
| 671.0792 | 1 | 13070.51 |
| 672.0782 | 1 | 9577.67  |
| 673.0809 | 1 | 11303.08 |
| 674.0816 |   | 6222.97  |
| 675.084  | 1 | 5601.15  |
| 683.0716 |   | 2703.74  |

*M<sup>+</sup>*  
*M+1*

|          |   |         |
|----------|---|---------|
| 684.0722 |   | 2575.16 |
| 684.1999 | 1 | 2409.44 |
| 685.0733 | 1 | 4603.34 |
| 686.0724 | 1 | 2886.61 |
| 687.0745 | 1 | 5855.21 |
| 688.0754 | 1 | 2427.34 |
| 689.0762 | 1 | 5058.53 |
| 691.075  |   | 2652.42 |
| 699.0696 |   | 3451.99 |
| 700.0693 |   | 2937.63 |
| 701.0694 | 1 | 5713.9  |
| 702.0696 | 1 | 3540.52 |
| 703.0698 | 1 | 8013.71 |
| 704.0694 | 1 | 3144.64 |
| 705.0687 | 1 | 7200.31 |
| 706.0709 | 1 | 2412.91 |
| 707.066  | 1 | 4535.3  |
| 715.0623 | 1 | 2058.69 |
| 717.0619 | 1 | 3024.07 |
| 719.0607 | 1 | 3054.84 |
| 721.0583 | 1 | 2207.92 |
| 733.0588 | 1 | 2448.3  |
| 735.0585 | 1 | 2614.2  |
| 737.0577 |   | 2234.56 |

## Qualitative Analysis Report

|                               |              |                      |                     |
|-------------------------------|--------------|----------------------|---------------------|
| <b>Data Filename</b>          | C.d          | <b>Sample Name</b>   | C                   |
| <b>Sample Type</b>            | Sample       | <b>Position</b>      | P1-F3               |
| <b>Instrument Name</b>        | Instrument 1 | <b>User Name</b>     | SANJAY PANDEY       |
| <b>Acq Method</b>             | DAILY MS.m   | <b>Acquired Time</b> | 15-04-2013 11:57:12 |
| <b>IRM Calibration Status</b> | Success      | <b>DA Method</b>     | default.m           |

C<sub>24</sub>H<sub>26</sub>N<sub>2</sub>Te<sub>2</sub>  
 Te-Te (Me, H)

|                       |                             |
|-----------------------|-----------------------------|
| <b>Sample Group</b>   | <b>Info.</b>                |
| <b>Acquisition SW</b> | 6200 series TOF/6500 series |
| <b>Version</b>        | Q-TOF B.05.01 (B5125)       |

### User Spectra

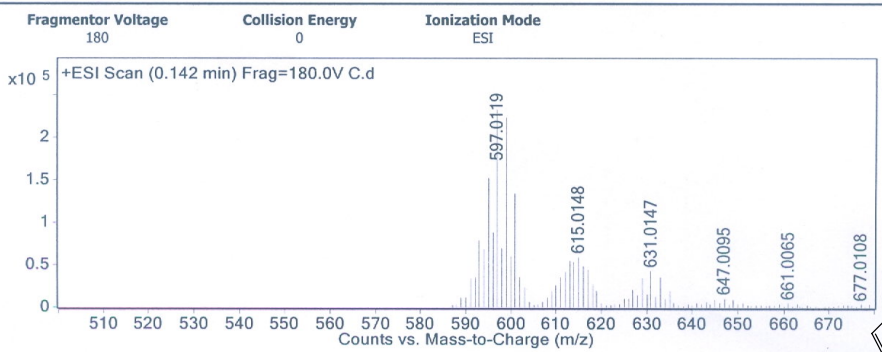

| m/z      | z | Abund     |
|----------|---|-----------|
| 106.0043 |   | 20135.74  |
| 217.1036 | 1 | 25098.11  |
| 591.0078 |   | 33688.94  |
| 592.0097 |   | 35354.34  |
| 593.0088 |   | 79388.07  |
| 594.011  |   | 67978.62  |
| 595.0101 | 1 | 153182.13 |
| 596.0131 | 1 | 87996.23  |
| 597.0119 | 1 | 233012.94 |
| 598.0164 | 1 | 69966.99  |
| 599.014  | 1 | 223999.25 |
| 600.0163 | 1 | 60311.64  |
| 601.0171 | 1 | 134477.61 |
| 602.0195 | 1 | 35858.62  |
| 603.0254 | 1 | 24040.16  |
| 609.0076 |   | 20202.92  |
| 610.01   |   | 26369.15  |
| 611.0103 |   | 35743.45  |
| 612.0111 |   | 41574.18  |
| 613.0118 |   | 55425.52  |
| 614.0137 |   | 54205.99  |
| 615.0148 |   | 59501.16  |
| 616.015  |   | 48483.43  |
| 617.0178 | 1 | 45436.3   |
| 618.0165 | 1 | 27364.58  |
| 619.021  | 1 | 19989.58  |

|          |   |          |
|----------|---|----------|
| 627.0111 | 1 | 20526.82 |
| 629.0126 | 1 | 34530.49 |
| 631.0147 | 1 | 43055.51 |
| 633.0154 | 1 | 35449.29 |

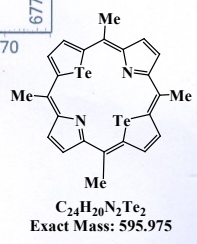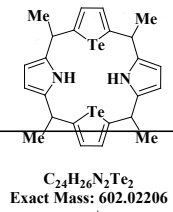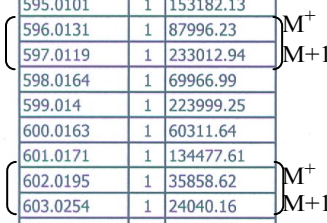

## Qualitative Analysis Report

|                               |                             |                      |                     |
|-------------------------------|-----------------------------|----------------------|---------------------|
| <b>Data Filename</b>          | D.d                         | <b>Sample Name</b>   | D                   |
| <b>Sample Type</b>            | Sample                      | <b>Position</b>      | P1-F4               |
| <b>Instrument Name</b>        | Instrument 1                | <b>User Name</b>     | SANJAY PANDEY       |
| <b>Acq Method</b>             | DAILY MS.m                  | <b>Acquired Time</b> | 15-04-2013 11:59:00 |
| <b>IRM Calibration Status</b> | Success                     | <b>DA Method</b>     | default.m           |
| <b>Comment</b>                |                             |                      |                     |
| <b>Sample Group</b>           |                             | <b>Info.</b>         |                     |
| <b>Acquisition SW</b>         | 6200 series TOF/6500 series |                      |                     |
| <b>Version</b>                | Q-TOF B.05.01 (B5125)       |                      |                     |

C<sub>24</sub> H<sub>26</sub> N<sub>2</sub> Se<sub>2</sub>  
 Se-Se (Me,H)

### User Spectra

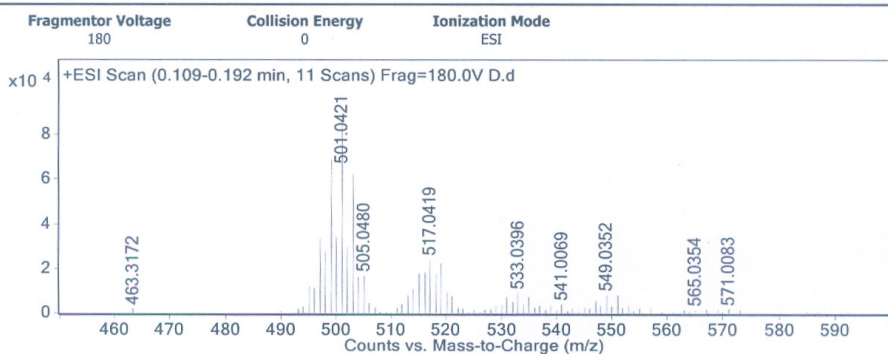

### Peak List

| <i>m/z</i> | <i>z</i> | Abund    |
|------------|----------|----------|
| 104.0088   |          | 6306.67  |
| 106.0044   |          | 24938.39 |
| 108.0809   |          | 7363.07  |
| 138.0302   |          | 5316.96  |
| 495.0403   |          | 11656.38 |
| 496.0425   |          | 11011.62 |
| 497.0406   |          | 33875.86 |
| 498.0425   |          | 27775.81 |
| 499.0411   | 1        | 68723.09 |
| 500.0462   | 1        | 34105.49 |
| 501.0421   | 1        | 90280.62 |
| 502.0448   | 1        | 29364.46 |
| 503.0459   | 1        | 62468.51 |
| 504.0484   | 1        | 16582.54 |
| 505.048    | 1        | 16967.43 |
| 513.0412   |          | 8151.2   |
| 514.0399   |          | 10789.09 |
| 515.0414   |          | 18083.18 |
| 516.0409   |          | 18600.64 |
| 517.0419   |          | 24187.69 |
| 518.0392   |          | 17956.06 |
| 519.0427   | 1        | 22701.88 |
| 520.0413   | 1        | 9131.24  |
| 521.0425   | 1        | 7787.92  |
| 531.0403   |          | 7378.4   |
| 533.0396   | 1        | 9051.95  |

|          |   |         |
|----------|---|---------|
| 535.0376 | 1 | 7347.33 |
| 547.037  | 1 | 5445.25 |
| 549.0352 | 1 | 8203.96 |
| 551.0339 | 1 | 7944.32 |

{

M<sup>+</sup>

M+1

{

M<sup>+</sup>

M+1

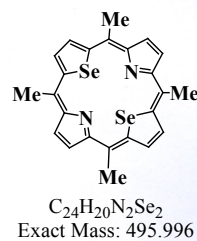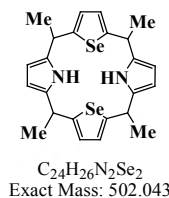

## Qualitative Analysis Report

|                        |              |               |                     |
|------------------------|--------------|---------------|---------------------|
| Data Filename          | B.d          | Sample Name   | B                   |
| Sample Type            | Sample       | Position      | P1-F2               |
| Instrument Name        | Instrument 1 | User Name     | SANJAY PANDEY       |
| Acq Method             | DAILY MS.m   | Acquired Time | 15-04-2013 11:56:25 |
| IRM Calibration Status | Success      | DA Method     | default.m           |

C<sub>20</sub>H<sub>18</sub>N<sub>2</sub>Se<sub>2</sub>  
 Se-Se Prop Calix

**Sample Group** Info.  
**Acquisition SW** 6200 series TOF/6500 series  
**Version** Q-TOF B.05.01 (B5125)

### User Spectra

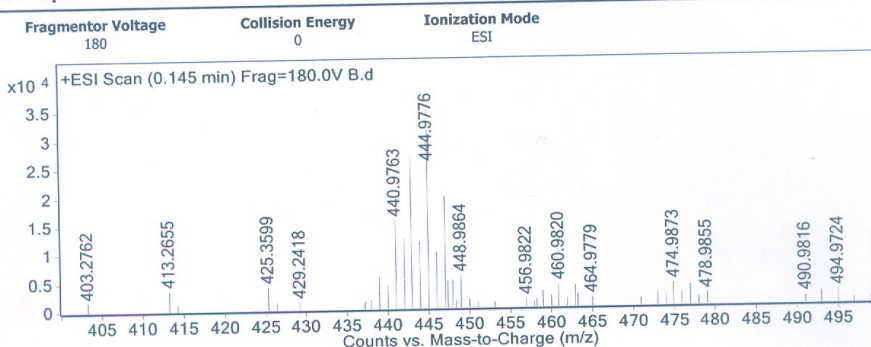

#### Peak List

| m/z      | z | Abund    |
|----------|---|----------|
| 100.0762 |   | 5234.97  |
| 104.0088 |   | 5499.56  |
| 106.0043 |   | 23878.04 |
| 108.0809 |   | 12102.1  |
| 122.9643 |   | 5098.26  |
| 132.0034 |   | 4959.11  |
| 138.0304 |   | 6057.64  |
| 149.0227 |   | 7768.87  |
| 217.1036 | 1 | 17430.88 |
| 261.1297 |   | 6203.27  |
| 376.0703 | 1 | 21439.15 |
| 438.9777 |   | 5805.08  |
| 440.9763 |   | 15559.27 |
| 441.9784 |   | 12402.97 |
| 442.9763 | 1 | 26860.93 |
| 443.982  | 1 | 11874.24 |
| 444.9776 | 1 | 34947.79 |
| 445.9799 | 1 | 9883.26  |
| 446.9817 | 1 | 19789.09 |
| 448.9864 | 1 | 5724.04  |

M+1

M<sup>+</sup>  
M+1

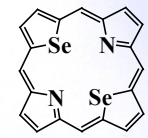

**C<sub>20</sub>H<sub>12</sub>N<sub>2</sub>Se<sub>2</sub>**  
 Exact Mass: 439.933

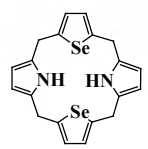

**C<sub>20</sub>H<sub>18</sub>N<sub>2</sub>Se<sub>2</sub>**  
 Exact Mass: 445.980

--- End Of Report ---

## Crystal data of 5g

Table 1. Crystal data and structure refinement for 1.

|                                   |                                                                |                                                                                                                                         |
|-----------------------------------|----------------------------------------------------------------|-----------------------------------------------------------------------------------------------------------------------------------------|
| Identification code               | shelxl                                                         |                                                                                                                                         |
| Empirical formula                 | C <sub>28</sub> H <sub>32</sub> N <sub>2</sub> Te <sub>2</sub> |                                                                                                                                         |
| Formula weight                    |                                                                |                                                                                                                                         |
| Temperature                       | 293(2) K                                                       |                                                                                                                                         |
| Wavelength                        | 0.71073 Å                                                      |                                                                                                                                         |
| Crystal system, space group       | Triclinic, P-1                                                 |                                                                                                                                         |
| Unit cell dimensions              |                                                                | a = 10.361(2) Å    alpha = 101.396(15) deg.<br>b = 11.572(3) Å    beta = 90.972(13) deg.<br>c = 11.8258(15) Å    gamma = 104.51(2) deg. |
| Volume                            | 1342.3(5) Å <sup>3</sup>                                       |                                                                                                                                         |
| Z, Calculated density             | 2, 1.613 Mg/m <sup>3</sup>                                     |                                                                                                                                         |
| Absorption coefficient            | 2.191 mm <sup>-1</sup>                                         |                                                                                                                                         |
| F(000)                            | 636                                                            |                                                                                                                                         |
| Crystal size                      | x x mm                                                         |                                                                                                                                         |
| Theta range for data collection   | 3.52 to 29.04 deg.                                             |                                                                                                                                         |
| Limiting indices                  | -14<=h<=13, -15<=k<=15, -15<=l<=16                             |                                                                                                                                         |
| Reflections collected / unique    | 13052 / 6096 [R(int) = 0.0748]                                 |                                                                                                                                         |
| Completeness to theta = 29.04     | 85.1 %                                                         |                                                                                                                                         |
| Refinement method                 | Full-matrix least-squares on F <sup>2</sup>                    |                                                                                                                                         |
| Data / restraints / parameters    | 6096 / 0 / 290                                                 |                                                                                                                                         |
| Goodness-of-fit on F <sup>2</sup> | 0.656                                                          |                                                                                                                                         |
| Final R indices [I>2sigma(I)]     | R1 = 0.0713, wR2 = 0.1865                                      |                                                                                                                                         |
| R indices (all data)              | R1 = 0.0848, wR2 = 0.2017                                      |                                                                                                                                         |
| Extinction coefficient            | 0.0069(9)                                                      |                                                                                                                                         |
| Largest diff. peak and hole       | 2.490 and -2.417 e.Å <sup>-3</sup>                             |                                                                                                                                         |

Table 2. Atomic coordinates (x 10<sup>4</sup>) and equivalent isotropic displacement parameters (Å<sup>2</sup> x 10<sup>3</sup>) for 1. U(eq) is defined as one third of the trace of the orthogonalized U<sub>ij</sub> tensor.

|       | x         | y        | z        | U(eq) |
|-------|-----------|----------|----------|-------|
| Te(1) | 1005(1)   | 6023(1)  | 1687(1)  | 44(1) |
| Te(2) | -3599(1)  | 4740(1)  | 1379(1)  | 39(1) |
| C(6)  | 2131(10)  | 3411(9)  | 1096(15) | 85(5) |
| C(21) | -4761(9)  | 7342(8)  | 1838(10) | 50(2) |
| N(1)  | -1301(6)  | 2904(5)  | 2247(6)  | 30(1) |
| C(15) | -3845(6)  | 3532(6)  | 2503(6)  | 26(1) |
| C(18) | -3873(6)  | 5952(6)  | 2830(6)  | 26(1) |
| C(25) | -175(7)   | 8554(6)  | 2963(7)  | 31(1) |
| C(8)  | -214(7)   | 2742(7)  | 1636(7)  | 35(2) |
| C(24) | -526(8)   | 9249(7)  | 2262(8)  | 40(2) |
| N(2)  | -1338(6)  | 7811(5)  | 3221(5)  | 29(1) |
| C(22) | -2426(7)  | 7990(6)  | 2665(6)  | 26(1) |
| C(11) | -2466(7)  | 2179(6)  | 1638(6)  | 28(1) |
| C(12) | -3803(7)  | 2205(6)  | 2110(6)  | 29(1) |
| C(10) | -2104(9)  | 1549(9)  | 655(8)   | 47(2) |
| C(4)  | 1221(7)   | 4764(7)  | 2681(9)  | 42(2) |
| C(19) | -3834(7)  | 7286(6)  | 2827(7)  | 31(1) |
| C(9)  | -697(10)  | 1880(9)  | 660(9)   | 51(2) |
| C(23) | -1929(8)  | 8907(7)  | 2079(7)  | 37(2) |
| C(1)  | 1183(7)   | 7165(7)  | 3296(8)  | 36(2) |
| C(17) | -4024(10) | 5381(8)  | 3742(7)  | 45(2) |
| C(14) | -4940(8)  | 1512(8)  | 1170(9)  | 48(2) |
| C(5)  | 1207(7)   | 3440(7)  | 2114(9)  | 44(2) |
| C(27) | 2294(9)   | 9230(9)  | 2826(12) | 64(3) |
| C(7)  | 1666(11)  | 2820(10) | 3036(13) | 76(4) |
| C(26) | 1163(7)   | 8516(7)  | 3462(8)  | 39(2) |
| C(16) | -4002(10) | 4138(8)  | 3577(7)  | 43(2) |
| C(3)  | 1360(10)  | 5379(12) | 3805(9)  | 58(3) |
| C(13) | -4016(9)  | 1539(8)  | 3131(8)  | 43(2) |
| C(20) | -4296(10) | 7896(8)  | 3976(9)  | 50(2) |

|       |          |          |          |       |
|-------|----------|----------|----------|-------|
| C(2)  | 1340(10) | 6465(12) | 4096(8)  | 57(3) |
| C(28) | 1336(10) | 9127(9)  | 4757(10) | 62(3) |

---

Table 3. Selected bond lengths [Å] and angles [deg] for 1.

---

Symmetry transformations used to generate equivalent atoms:

Table 4. Bond lengths [Å] and angles [deg] for 1.

---

|                   |           |
|-------------------|-----------|
| Te(1)-C(1)        | 2.067(9)  |
| Te(1)-C(4)        | 2.095(8)  |
| Te(2)-C(18)       | 2.064(7)  |
| Te(2)-C(15)       | 2.086(7)  |
| C(6)-C(5)         | 1.551(15) |
| C(21)-C(19)       | 1.522(11) |
| N(1)-C(8)         | 1.380(9)  |
| N(1)-C(11)        | 1.380(9)  |
| C(15)-C(16)       | 1.358(10) |
| C(15)-C(12)       | 1.525(9)  |
| C(18)-C(17)       | 1.364(11) |
| C(18)-C(19)       | 1.535(9)  |
| C(25)-C(24)       | 1.367(11) |
| C(25)-N(2)        | 1.371(9)  |
| C(25)-C(26)       | 1.511(10) |
| C(8)-C(9)         | 1.362(13) |
| C(8)-C(5)         | 1.528(11) |
| C(24)-C(23)       | 1.408(11) |
| N(2)-C(22)        | 1.375(9)  |
| C(22)-C(23)       | 1.379(10) |
| C(22)-C(19)       | 1.518(9)  |
| C(11)-C(10)       | 1.356(11) |
| C(11)-C(12)       | 1.507(9)  |
| C(12)-C(13)       | 1.547(11) |
| C(12)-C(14)       | 1.548(10) |
| C(10)-C(9)        | 1.412(13) |
| C(4)-C(3)         | 1.365(14) |
| C(4)-C(5)         | 1.543(11) |
| C(19)-C(20)       | 1.545(11) |
| C(1)-C(2)         | 1.393(13) |
| C(1)-C(26)        | 1.543(10) |
| C(17)-C(16)       | 1.419(12) |
| C(5)-C(7)         | 1.547(15) |
| C(27)-C(26)       | 1.552(12) |
| C(26)-C(28)       | 1.542(14) |
| C(3)-C(2)         | 1.241(16) |
| C(1)-Te(1)-C(4)   | 82.3(4)   |
| C(18)-Te(2)-C(15) | 83.3(3)   |
| C(8)-N(1)-C(11)   | 109.9(6)  |
| C(16)-C(15)-C(12) | 128.7(7)  |
| C(16)-C(15)-Te(2) | 108.8(5)  |
| C(12)-C(15)-Te(2) | 122.4(5)  |
| C(17)-C(18)-C(19) | 128.2(7)  |
| C(17)-C(18)-Te(2) | 108.9(5)  |
| C(19)-C(18)-Te(2) | 122.9(5)  |
| C(24)-C(25)-N(2)  | 107.0(6)  |
| C(24)-C(25)-C(26) | 132.2(7)  |
| N(2)-C(25)-C(26)  | 120.8(7)  |
| C(9)-C(8)-N(1)    | 106.9(7)  |
| C(9)-C(8)-C(5)    | 132.1(7)  |
| N(1)-C(8)-C(5)    | 120.9(7)  |
| C(25)-C(24)-C(23) | 108.0(7)  |

|                   |           |
|-------------------|-----------|
| C(25)-N(2)-C(22)  | 110.7(6)  |
| N(2)-C(22)-C(23)  | 106.1(6)  |
| N(2)-C(22)-C(19)  | 120.8(6)  |
| C(23)-C(22)-C(19) | 132.9(6)  |
| C(10)-C(11)-N(1)  | 106.7(7)  |
| C(10)-C(11)-C(12) | 132.8(7)  |
| N(1)-C(11)-C(12)  | 120.4(6)  |
| C(11)-C(12)-C(15) | 108.7(6)  |
| C(11)-C(12)-C(13) | 110.0(6)  |
| C(15)-C(12)-C(13) | 110.6(6)  |
| C(11)-C(12)-C(14) | 110.0(6)  |
| C(15)-C(12)-C(14) | 110.7(6)  |
| C(13)-C(12)-C(14) | 106.8(7)  |
| C(11)-C(10)-C(9)  | 108.5(8)  |
| C(3)-C(4)-C(5)    | 132.7(9)  |
| C(3)-C(4)-Te(1)   | 105.8(7)  |
| C(5)-C(4)-Te(1)   | 121.5(7)  |
| C(22)-C(19)-C(21) | 108.6(7)  |
| C(22)-C(19)-C(18) | 110.2(5)  |
| C(21)-C(19)-C(18) | 109.9(6)  |
| C(22)-C(19)-C(20) | 109.2(6)  |
| C(21)-C(19)-C(20) | 108.5(7)  |
| C(18)-C(19)-C(20) | 110.5(7)  |
| C(8)-C(9)-C(10)   | 107.8(7)  |
| C(22)-C(23)-C(24) | 108.2(7)  |
| C(2)-C(1)-C(26)   | 131.1(9)  |
| C(2)-C(1)-Te(1)   | 106.0(7)  |
| C(26)-C(1)-Te(1)  | 122.9(6)  |
| C(18)-C(17)-C(16) | 119.9(7)  |
| C(8)-C(5)-C(4)    | 109.2(6)  |
| C(8)-C(5)-C(7)    | 109.3(7)  |
| C(4)-C(5)-C(7)    | 109.1(9)  |
| C(8)-C(5)-C(6)    | 108.1(9)  |
| C(4)-C(5)-C(6)    | 110.9(7)  |
| C(7)-C(5)-C(6)    | 110.3(9)  |
| C(25)-C(26)-C(28) | 109.3(7)  |
| C(25)-C(26)-C(1)  | 107.7(6)  |
| C(28)-C(26)-C(1)  | 110.5(8)  |
| C(25)-C(26)-C(27) | 109.3(8)  |
| C(28)-C(26)-C(27) | 108.9(8)  |
| C(1)-C(26)-C(27)  | 111.1(7)  |
| C(15)-C(16)-C(17) | 119.1(7)  |
| C(2)-C(3)-C(4)    | 123.2(10) |
| C(3)-C(2)-C(1)    | 122.6(10) |

Symmetry transformations used to generate equivalent atoms:

Table 5. Anisotropic displacement parameters ( $\text{\AA}^2 \times 10^3$ ) for 1.

The anisotropic displacement factor exponent takes the form:

$-2 \pi^2 [ h^2 a^{*2} U_{11} + \dots + 2 h k a^* b^* U_{12} ]$

|       | U11   | U22   | U33     | U23   | U13    | U12   |
|-------|-------|-------|---------|-------|--------|-------|
| Te(1) | 46(1) | 34(1) | 53(1)   | 11(1) | 3(1)   | 10(1) |
| Te(2) | 55(1) | 32(1) | 30(1)   | 10(1) | 12(1)  | 8(1)  |
| C(6)  | 38(5) | 36(5) | 171(15) | 4(7)  | 49(7)  | 2(4)  |
| C(21) | 33(4) | 36(4) | 77(7)   | 8(4)  | -20(4) | 5(3)  |
| N(1)  | 20(3) | 26(3) | 40(3)   | 6(2)  | 10(2)  | -3(2) |
| C(15) | 18(3) | 24(3) | 34(3)   | 8(3)  | 4(2)   | -2(2) |
| C(18) | 15(3) | 20(3) | 39(4)   | 10(3) | 6(2)   | -6(2) |
| C(25) | 20(3) | 23(3) | 43(4)   | 3(3)  | 5(3)   | -2(3) |
| C(8)  | 21(3) | 27(3) | 58(5)   | 16(3) | 19(3)  | 3(3)  |
| C(24) | 37(4) | 27(4) | 53(5)   | 18(3) | 11(3)  | -5(3) |
| N(2)  | 23(3) | 29(3) | 38(3)   | 16(3) | 4(2)   | 3(2)  |
| C(22) | 22(3) | 23(3) | 30(3)   | 6(3)  | 2(2)   | 2(3)  |
| C(11) | 26(3) | 23(3) | 34(3)   | 9(3)  | 7(3)   | 1(3)  |
| C(12) | 22(3) | 24(3) | 36(4)   | 6(3)  | 5(3)   | -2(3) |
| C(10) | 46(5) | 48(5) | 40(4)   | -3(4) | 4(4)   | 11(4) |
| C(4)  | 12(3) | 28(4) | 87(7)   | 27(4) | 5(3)   | -4(3) |

|       |       |       |         |        |        |        |
|-------|-------|-------|---------|--------|--------|--------|
| C(19) | 24(3) | 26(3) | 43(4)   | 9(3)   | 6(3)   | 5(3)   |
| C(9)  | 51(5) | 51(5) | 52(5)   | 1(4)   | 19(4)  | 20(4)  |
| C(23) | 34(4) | 32(4) | 45(4)   | 15(3)  | -2(3)  | 3(3)   |
| C(1)  | 14(3) | 29(3) | 61(5)   | 10(3)  | 6(3)   | -1(3)  |
| C(17) | 62(6) | 45(5) | 32(4)   | 9(3)   | 16(4)  | 20(4)  |
| C(14) | 32(4) | 36(4) | 60(6)   | -7(4)  | -7(4)  | -6(3)  |
| C(5)  | 18(3) | 23(3) | 93(7)   | 16(4)  | 12(4)  | 1(3)   |
| C(27) | 25(4) | 39(5) | 123(10) | 24(6)  | 19(5)  | -5(4)  |
| C(7)  | 48(6) | 43(5) | 138(12) | 26(7)  | -20(7) | 14(5)  |
| C(26) | 19(3) | 27(3) | 64(5)   | 5(4)   | 0(3)   | 0(3)   |
| C(16) | 62(5) | 39(4) | 30(4)   | 13(3)  | 18(4)  | 15(4)  |
| C(3)  | 41(5) | 80(8) | 43(5)   | 25(5)  | 0(4)   | -12(5) |
| C(13) | 41(4) | 33(4) | 56(5)   | 23(4)  | 16(4)  | 0(3)   |
| C(20) | 52(5) | 40(5) | 62(6)   | 9(4)   | 22(4)  | 18(4)  |
| C(2)  | 39(5) | 92(8) | 39(5)   | 30(5)  | -3(4)  | 2(5)   |
| C(28) | 51(6) | 47(5) | 72(7)   | -14(5) | -31(5) | 10(4)  |

Table 6. Hydrogen coordinates ( $\times 10^4$ ) and isotropic displacement parameters ( $\text{Å}^2 \times 10^3$ ) for 1.

|        | x     | y     | z    | U(eq) |
|--------|-------|-------|------|-------|
| H(6A)  | 3030  | 3846  | 1378 | 127   |
| H(6B)  | 1830  | 3790  | 526  | 127   |
| H(6C)  | 2103  | 2580  | 754  | 127   |
| H(21A) | -5656 | 6900  | 1930 | 75    |
| H(21B) | -4472 | 6984  | 1116 | 75    |
| H(21C) | -4738 | 8178  | 1845 | 75    |
| H(1)   | -1258 | 3385  | 2909 | 36    |
| H(24)  | 59    | 9843  | 1958 | 48    |
| H(2)   | -1381 | 7303  | 3670 | 35    |
| H(10)  | -2686 | 992   | 75   | 56    |
| H(9)   | -189  | 1564  | 97   | 61    |
| H(23)  | -2433 | 9242  | 1639 | 44    |
| H(17)  | -4141 | 5806  | 4471 | 54    |
| H(14A) | -5788 | 1525  | 1480 | 72    |
| H(14B) | -4893 | 682   | 930  | 72    |
| H(14C) | -4844 | 1898  | 518  | 72    |
| H(27A) | 3146  | 9208  | 3141 | 95    |
| H(27B) | 2248  | 10062 | 2927 | 95    |
| H(27C) | 2188  | 8861  | 2017 | 95    |
| H(7A)  | 2559  | 3256  | 3337 | 113   |
| H(7B)  | 1647  | 1992  | 2691 | 113   |
| H(7C)  | 1076  | 2828  | 3654 | 113   |
| H(16)  | -4094 | 3744  | 4195 | 51    |
| H(3)   | 1475  | 4964  | 4382 | 70    |
| H(13A) | -4869 | 1559  | 3425 | 64    |
| H(13B) | -3322 | 1938  | 3732 | 64    |
| H(13C) | -3987 | 706   | 2868 | 64    |
| H(20A) | -5184 | 7450  | 4085 | 75    |
| H(20B) | -4292 | 8721  | 3952 | 75    |
| H(20C) | -3699 | 7895  | 4606 | 75    |
| H(2)   | 1433  | 6826  | 4879 | 68    |
| H(28A) | 2186  | 9105  | 5076 | 92    |
| H(28B) | 635   | 8696  | 5156 | 92    |
| H(28C) | 1295  | 9960  | 4846 | 92    |

Table 7. Selected torsion angles [deg] for 1.

|  |  |
|--|--|
|  |  |
|  |  |

Symmetry transformations used to generate equivalent atoms:

Table 8. Torsion angles [deg] for 1.

|                         |         |
|-------------------------|---------|
| C(18)-Te(2)-C(15)-C(16) | -2.2(6) |
|-------------------------|---------|



|                         |            |
|-------------------------|------------|
| C(18)-Te(2)-C(15)-C(12) | 179.3(5)   |
| C(15)-Te(2)-C(18)-C(17) | 1.8(6)     |
| C(15)-Te(2)-C(18)-C(19) | 179.3(5)   |
| C(11)-N(1)-C(8)-C(9)    | -2.2(9)    |
| C(11)-N(1)-C(8)-C(5)    | 179.9(7)   |
| N(2)-C(25)-C(24)-C(23)  | -0.8(9)    |
| C(26)-C(25)-C(24)-C(23) | -179.2(8)  |
| C(24)-C(25)-N(2)-C(22)  | 2.1(8)     |
| C(26)-C(25)-N(2)-C(22)  | -179.4(6)  |
| C(25)-N(2)-C(22)-C(23)  | -2.4(8)    |
| C(25)-N(2)-C(22)-C(19)  | -179.1(6)  |
| C(8)-N(1)-C(11)-C(10)   | 1.1(9)     |
| C(8)-N(1)-C(11)-C(12)   | -178.8(6)  |
| C(10)-C(11)-C(12)-C(15) | -131.9(9)  |
| N(1)-C(11)-C(12)-C(15)  | 47.9(9)    |
| C(10)-C(11)-C(12)-C(13) | 106.8(10)  |
| N(1)-C(11)-C(12)-C(13)  | -73.4(8)   |
| C(10)-C(11)-C(12)-C(14) | -10.6(12)  |
| N(1)-C(11)-C(12)-C(14)  | 169.2(7)   |
| C(16)-C(15)-C(12)-C(11) | -119.1(9)  |
| Te(2)-C(15)-C(12)-C(11) | 59.1(7)    |
| C(16)-C(15)-C(12)-C(13) | 1.8(11)    |
| Te(2)-C(15)-C(12)-C(13) | 180.0(5)   |
| C(16)-C(15)-C(12)-C(14) | 120.0(9)   |
| Te(2)-C(15)-C(12)-C(14) | -61.8(8)   |
| N(1)-C(11)-C(10)-C(9)   | 0.5(10)    |
| C(12)-C(11)-C(10)-C(9)  | -179.7(8)  |
| C(1)-Te(1)-C(4)-C(3)    | -0.2(6)    |
| C(1)-Te(1)-C(4)-C(5)    | 179.9(6)   |
| N(2)-C(22)-C(19)-C(21)  | -161.4(7)  |
| C(23)-C(22)-C(19)-C(21) | 23.0(11)   |
| N(2)-C(22)-C(19)-C(18)  | -41.0(9)   |
| C(23)-C(22)-C(19)-C(18) | 143.4(8)   |
| N(2)-C(22)-C(19)-C(20)  | 80.5(8)    |
| C(23)-C(22)-C(19)-C(20) | -95.1(10)  |
| C(17)-C(18)-C(19)-C(22) | 108.5(9)   |
| Te(2)-C(18)-C(19)-C(22) | -68.4(7)   |
| C(17)-C(18)-C(19)-C(21) | -132.0(9)  |
| Te(2)-C(18)-C(19)-C(21) | 51.1(8)    |
| C(17)-C(18)-C(19)-C(20) | -12.2(11)  |
| Te(2)-C(18)-C(19)-C(20) | 170.8(5)   |
| N(1)-C(8)-C(9)-C(10)    | 2.4(10)    |
| C(5)-C(8)-C(9)-C(10)    | 180.0(9)   |
| C(11)-C(10)-C(9)-C(8)   | -1.9(11)   |
| N(2)-C(22)-C(23)-C(24)  | 1.8(9)     |
| C(19)-C(22)-C(23)-C(24) | 177.9(8)   |
| C(25)-C(24)-C(23)-C(22) | -0.6(10)   |
| C(4)-Te(1)-C(1)-C(2)    | 0.0(6)     |
| C(4)-Te(1)-C(1)-C(26)   | 178.7(6)   |
| C(19)-C(18)-C(17)-C(16) | -178.5(8)  |
| Te(2)-C(18)-C(17)-C(16) | -1.2(11)   |
| C(9)-C(8)-C(5)-C(4)     | 142.4(10)  |
| N(1)-C(8)-C(5)-C(4)     | -40.4(11)  |
| C(9)-C(8)-C(5)-C(7)     | -98.4(12)  |
| N(1)-C(8)-C(5)-C(7)     | 78.9(10)   |
| C(9)-C(8)-C(5)-C(6)     | 21.7(13)   |
| N(1)-C(8)-C(5)-C(6)     | -161.1(8)  |
| C(3)-C(4)-C(5)-C(8)     | 108.4(10)  |
| Te(1)-C(4)-C(5)-C(8)    | -71.8(8)   |
| C(3)-C(4)-C(5)-C(7)     | -11.0(12)  |
| Te(1)-C(4)-C(5)-C(7)    | 168.8(6)   |
| C(3)-C(4)-C(5)-C(6)     | -132.6(11) |
| Te(1)-C(4)-C(5)-C(6)    | 47.2(10)   |
| C(24)-C(25)-C(26)-C(28) | 105.2(11)  |
| N(2)-C(25)-C(26)-C(28)  | -73.0(9)   |
| C(24)-C(25)-C(26)-C(1)  | -134.7(9)  |
| N(2)-C(25)-C(26)-C(1)   | 47.2(10)   |

|                         |           |
|-------------------------|-----------|
| C(24)-C(25)-C(26)-C(27) | -13.9(12) |
| N(2)-C(25)-C(26)-C(27)  | 167.9(7)  |
| C(2)-C(1)-C(26)-C(25)   | -120.2(9) |
| Te(1)-C(1)-C(26)-C(25)  | 61.5(8)   |
| C(2)-C(1)-C(26)-C(28)   | -0.8(11)  |
| Te(1)-C(1)-C(26)-C(28)  | -179.2(6) |
| C(2)-C(1)-C(26)-C(27)   | 120.2(10) |
| Te(1)-C(1)-C(26)-C(27)  | -58.2(9)  |
| C(12)-C(15)-C(16)-C(17) | -179.3(8) |
| Te(2)-C(15)-C(16)-C(17) | 2.2(10)   |
| C(18)-C(17)-C(16)-C(15) | -0.8(14)  |
| C(5)-C(4)-C(3)-C(2)     | -179.7(9) |
| Te(1)-C(4)-C(3)-C(2)    | 0.4(12)   |
| C(4)-C(3)-C(2)-C(1)     | -0.5(16)  |
| C(26)-C(1)-C(2)-C(3)    | -178.3(9) |
| Te(1)-C(1)-C(2)-C(3)    | 0.3(12)   |

---

Symmetry transformations used to generate equivalent atoms:

Table 9. Hydrogen bonds for 1 [A and deg.].

---

| D-H...A | d(D-H) | d(H...A) | d(D...A) | <(DHA) |
|---------|--------|----------|----------|--------|
|---------|--------|----------|----------|--------|

---
